# Supplementary material for: Mono-, Di- and Tetra-iron Complexes with Selenium or Sulphur Functionalized Vinyliminium Ligands: Synthesis, Structural Characterization and Antiproliferative Activity
Source: MDPI journal article supplement (doi:10.3390/molecules25071656), 2020-04-03

# checkCIF/PLATON report

Structure factors have been supplied for datablock(s) 3

THIS REPORT IS FOR GUIDANCE ONLY. IF USED AS PART OF A REVIEW PROCEDURE FOR PUBLICATION, IT SHOULD NOT REPLACE THE EXPERTISE OF AN EXPERIENCED CRYSTALLOGRAPHIC REFEREE.

No syntax errors found.      CIF dictionary      Interpreting this report

## Datablock: 3

---

Bond precision:    C-C = 0.0675 Å                      Wavelength=0.71073

Cell:                      a=13.454(3)              b=7.675(2)              c=12.285(2)  
                                alpha=90              beta=99.07(3)              gamma=90  
Temperature:              100 K

|                | Calculated        | Reported          |
|----------------|-------------------|-------------------|
| Volume         | 1252.7(5)         | 1252.5(5)         |
| Space group    | P c               | P c               |
| Hall group     | P -2yc            | P -2yc            |
| Moiety formula | C12 H15 Fe N O Se | ?                 |
| Sum formula    | C12 H15 Fe N O Se | C12 H15 Fe N O Se |
| Mr             | 324.06            | 324.06            |
| Dx,g cm-3      | 1.718             | 1.719             |
| Z              | 4                 | 4                 |
| Mu (mm-1)      | 4.087             | 4.088             |
| F000           | 648.0             | 648.0             |
| F000'          | 649.21            |                   |
| h,k,lmax       | 15,9,14           | 15,9,14           |
| Nref           | 4399[ 2204]       | 2119              |
| Tmin,Tmax      | 0.441,0.542       | 0.355,0.745       |
| Tmin'          | 0.408             |                   |

Correction method= # Reported T Limits: Tmin=0.355 Tmax=0.745  
AbsCorr = EMPIRICAL

Data completeness= 0.96/0.48                      Theta(max)= 24.999

R(reflections)= 0.1174( 1870)                      wR2(reflections)= 0.2914( 2119)

S = 1.116                      Npar= 290

---

The following ALERTS were generated. Each ALERT has the format

**test-name\_ALERT\_alert-type\_alert-level.**

Click on the hyperlinks for more details of the test.

---

### Alert level B

PLAT341\_ALERT\_3\_B Low Bond Precision on C-C Bonds ..... 0.0675 Ang.

---

### Alert level C

PLAT082\_ALERT\_2\_C High R1 Value ..... 0.12 Report  
PLAT084\_ALERT\_3\_C High wR2 Value (i.e. > 0.25) ..... 0.29 Report  
PLAT090\_ALERT\_3\_C Poor Data / Parameter Ratio (Zmax > 18) ..... 7.30 Note  
PLAT147\_ALERT\_1\_C s.u. on Symmetry Constrained Cell Angle(s) ..... Please Check  
PLAT213\_ALERT\_2\_C Atom C3 has ADP max/min Ratio ..... 4.0 oblate  
PLAT369\_ALERT\_2\_C Long C(sp2)-C(sp2) Bond C28 - C29 ..... 1.56 Ang.  
PLAT906\_ALERT\_3\_C Large K Value in the Analysis of Variance ..... 2.534 Check  
PLAT911\_ALERT\_3\_C Missing FCF Refl Between Thmin & STh/L= 0.595 ..... 87 Report  
PLAT914\_ALERT\_3\_C No Bijvoet Pairs in FCF for Non-centro Structure ..... Please Check

---

### Alert level G

PLAT003\_ALERT\_2\_G Number of Uiso or Uij Restrained non-H Atoms ... 32 Report  
PLAT083\_ALERT\_2\_G SHELXL Second Parameter in WGHT Unusually Large 143.84 Why ?  
PLAT178\_ALERT\_4\_G The CIF-Embedded .res File Contains SIMU Records 1 Report  
PLAT186\_ALERT\_4\_G The CIF-Embedded .res File Contains ISOR Records 2 Report  
PLAT380\_ALERT\_4\_G Incorrectly? Oriented X(sp2)-Methyl Moiety ..... C5 Check  
PLAT380\_ALERT\_4\_G Incorrectly? Oriented X(sp2)-Methyl Moiety ..... C6 Check  
PLAT380\_ALERT\_4\_G Incorrectly? Oriented X(sp2)-Methyl Moiety ..... C7 Check  
PLAT380\_ALERT\_4\_G Incorrectly? Oriented X(sp2)-Methyl Moiety ..... C25 Check  
PLAT380\_ALERT\_4\_G Incorrectly? Oriented X(sp2)-Methyl Moiety ..... C26 Check  
PLAT380\_ALERT\_4\_G Incorrectly? Oriented X(sp2)-Methyl Moiety ..... C27 Check  
PLAT860\_ALERT\_3\_G Number of Least-Squares Restraints ..... 350 Note  
PLAT870\_ALERT\_4\_G ALERTS Related to Twinning Effects Suppressed .. ! Info  
PLAT883\_ALERT\_1\_G No Info/Value for \_atom\_sites\_solution\_primary . Please Do !  
PLAT909\_ALERT\_3\_G Percentage of I>2sig(I) Data at Theta(Max) Still 84% Note

---

0 **ALERT level A** = Most likely a serious problem - resolve or explain  
1 **ALERT level B** = A potentially serious problem, consider carefully  
9 **ALERT level C** = Check. Ensure it is not caused by an omission or oversight  
14 **ALERT level G** = General information/check it is not something unexpected

2 ALERT type 1 CIF construction/syntax error, inconsistent or missing data  
5 ALERT type 2 Indicator that the structure model may be wrong or deficient  
8 ALERT type 3 Indicator that the structure quality may be low  
9 ALERT type 4 Improvement, methodology, query or suggestion  
0 ALERT type 5 Informative message, check

---

It is advisable to attempt to resolve as many as possible of the alerts in all categories. Often the minor alerts point to easily fixed oversights, errors and omissions in your CIF or refinement strategy, so attention to these fine details can be worthwhile. In order to resolve some of the more serious problems it may be necessary to carry out additional measurements or structure refinements. However, the purpose of your study may justify the reported deviations and the more serious of these should normally be commented upon in the discussion or experimental section of a paper or in the "special\_details" fields of the CIF. checkCIF was carefully designed to identify outliers and unusual parameters, but every test has its limitations and alerts that are not important in a particular case may appear. Conversely, the absence of alerts does not guarantee there are no aspects of the results needing attention. It is up to the individual to critically assess their own results and, if necessary, seek expert advice.

### **Publication of your CIF in IUCr journals**

A basic structural check has been run on your CIF. These basic checks will be run on all CIFs submitted for publication in IUCr journals (*Acta Crystallographica*, *Journal of Applied Crystallography*, *Journal of Synchrotron Radiation*); however, if you intend to submit to *Acta Crystallographica Section C* or *E* or *IUCrData*, you should make sure that full publication checks are run on the final version of your CIF prior to submission.

### **Publication of your CIF in other journals**

Please refer to the *Notes for Authors* of the relevant journal for any special instructions relating to CIF submission.

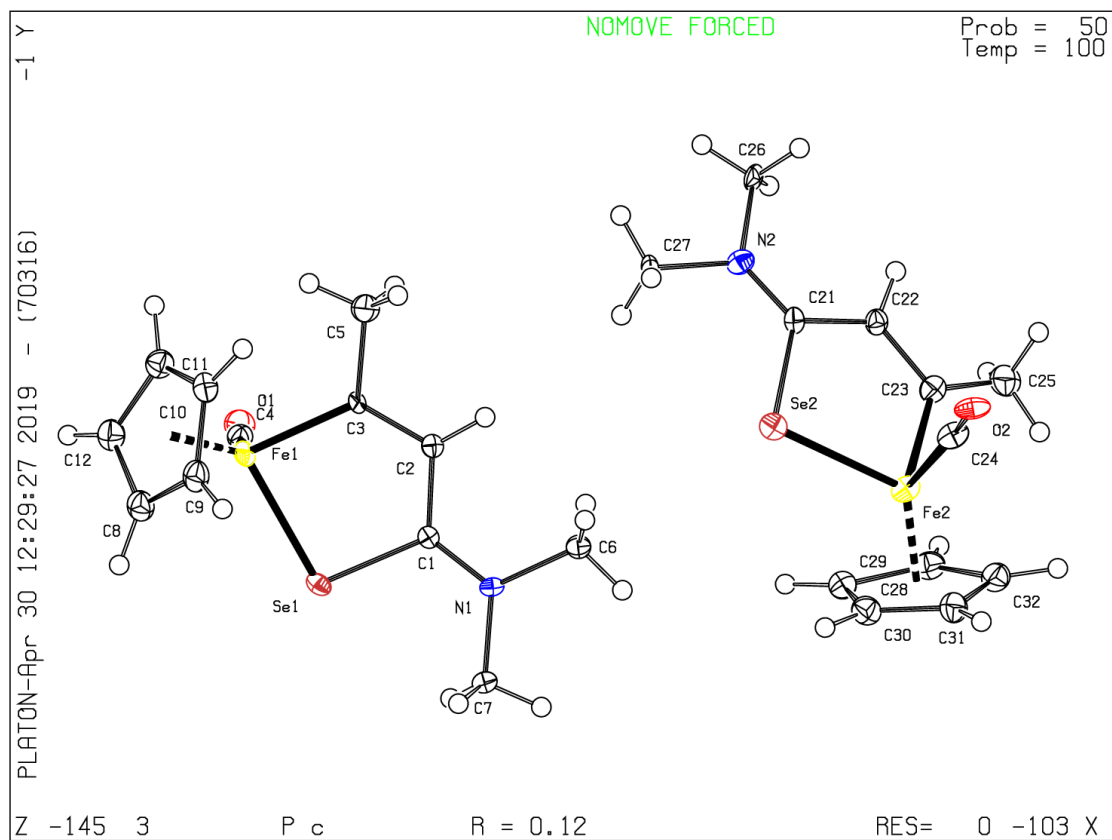

Supplement: s1 [file s1]
