# Supplementary material for: Mono-, Di- and Tetra-iron Complexes with Selenium or Sulphur Functionalized Vinyliminium Ligands: Synthesis, Structural Characterization and Antiproliferative Activity
Source: MDPI journal article supplement (doi:10.3390/molecules25071656), 2020-04-03

# **Mono-, Di- and Tetra-iron Complexes with Selenium or Sulphur Functionalized Vinyliminium Ligands: Synthesis, Structural Characterization and Antiproliferative Activity**

Gabriele Agonigi, Lucinda K. Batchelor, Eleonora Ferretti, Silvia Schoch, Marco Bortoluzzi,  
Simona Braccini, Federica Chiellini, Lorenzo Biancalana, Stefano Zacchini, Guido Pampaloni,  
Biprajit Sarkar, Paul J. Dyson, Fabio Marchetti

## **Supporting Information**

| <b><u>Table of contents</u></b>             | <i>Pages</i> |
|---------------------------------------------|--------------|
| <b>Figures S1-S3:</b> DFT structures        | S2           |
| <b>Figures S4-S14:</b> Cyclic voltammograms | S4           |
| <b>Figures S15-S34:</b> NMR spectra         | S10          |

**Figure S1.** Electrostatic potential surfaces (isovalue =  $-20 \text{ kcal mol}^{-1}$ ) of the E-Z isomers of **2b**. EDF2/6-31G\*\* calculations. Color map: Fe, green; S, yellow; O, red; N, blue; C, grey; H, white.

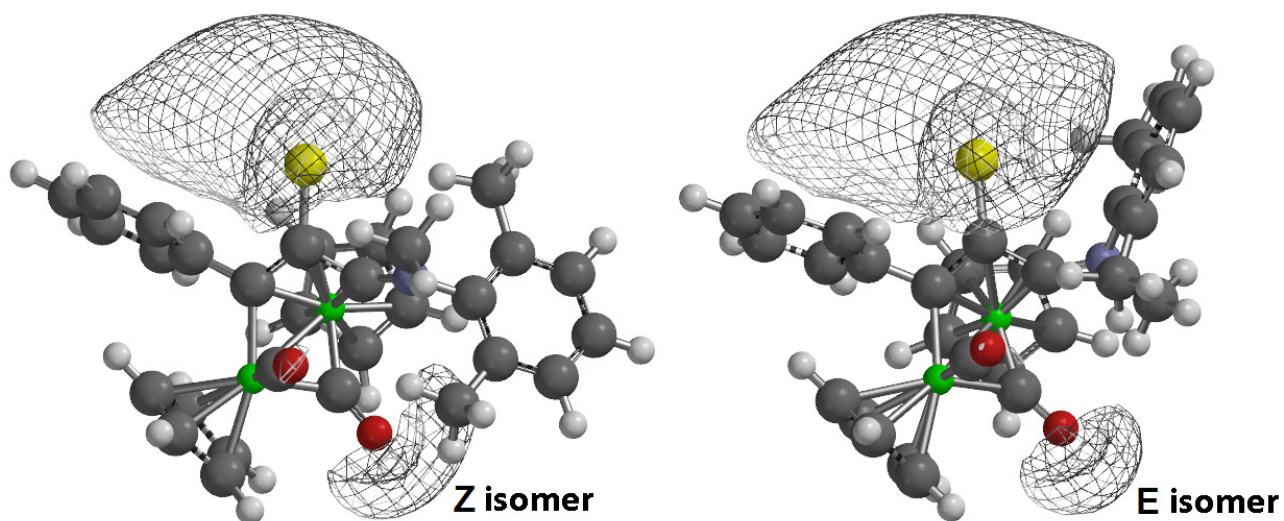

**Figure S2.** DFT-optimized structure of **4b** (Z configuration). C-PCM/ $\omega$ B97X/def2-SVP calculation. Color map: Fe, green; S, yellow; O, red; N, blue; C, grey. Hydrogen atoms are omitted for clarity. Cartesian coordinates are collected in a separated .xyz file.

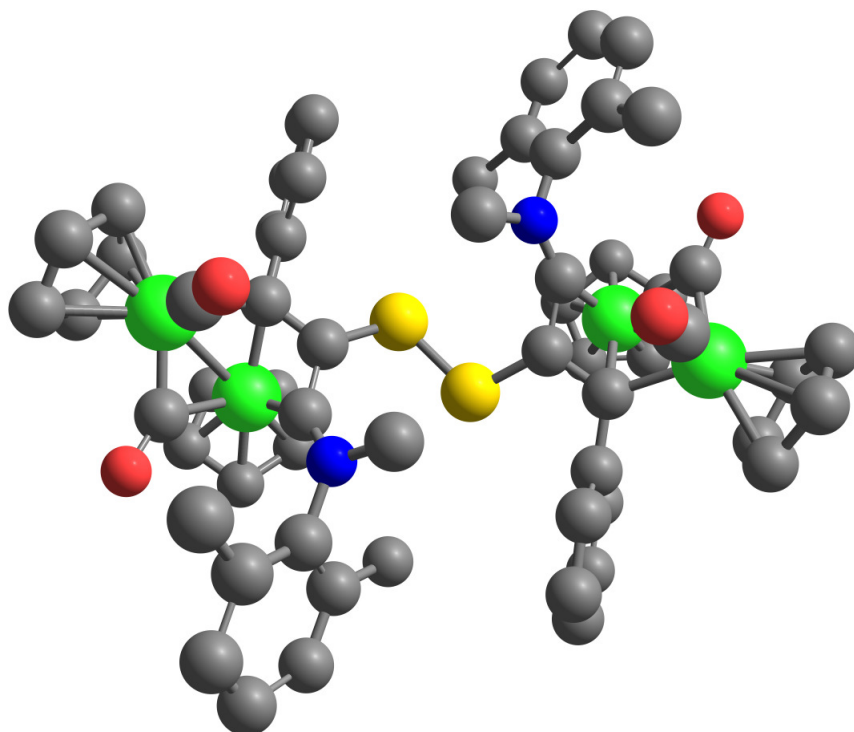

**Figure S3.** DFT-optimized structure of **4d** (Z configuration). C-PCM/ $\omega$ B97X/def2-SVP calculation. Color map: Fe, green; Se, orange; O, red; N, blue; C, grey. Hydrogen atoms are omitted for clarity. Cartesian coordinates are collected in a separated .xyz file.

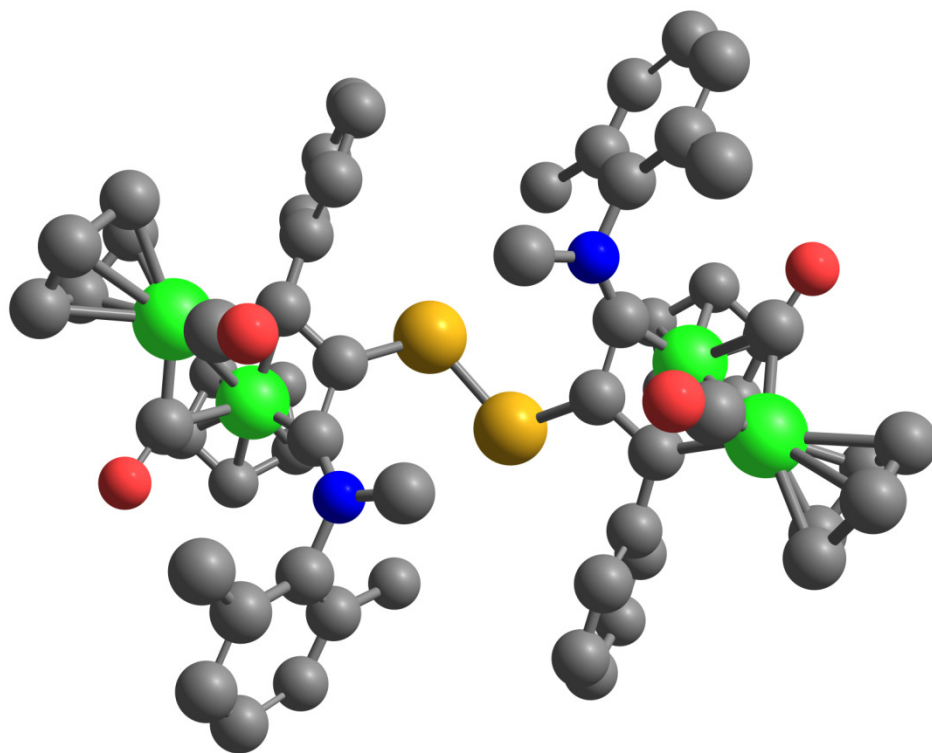

**Figure S4.** Cyclic voltammogram of **1a** recorded in MeCN at a scan rate of 100 mV/s with NBu<sub>4</sub>PF<sub>6</sub> (0.1 M) as the supporting electrolyte; potentials reported versus the ferrocenium/ferrocene (Fc<sup>+</sup>/Fc) redox couple.

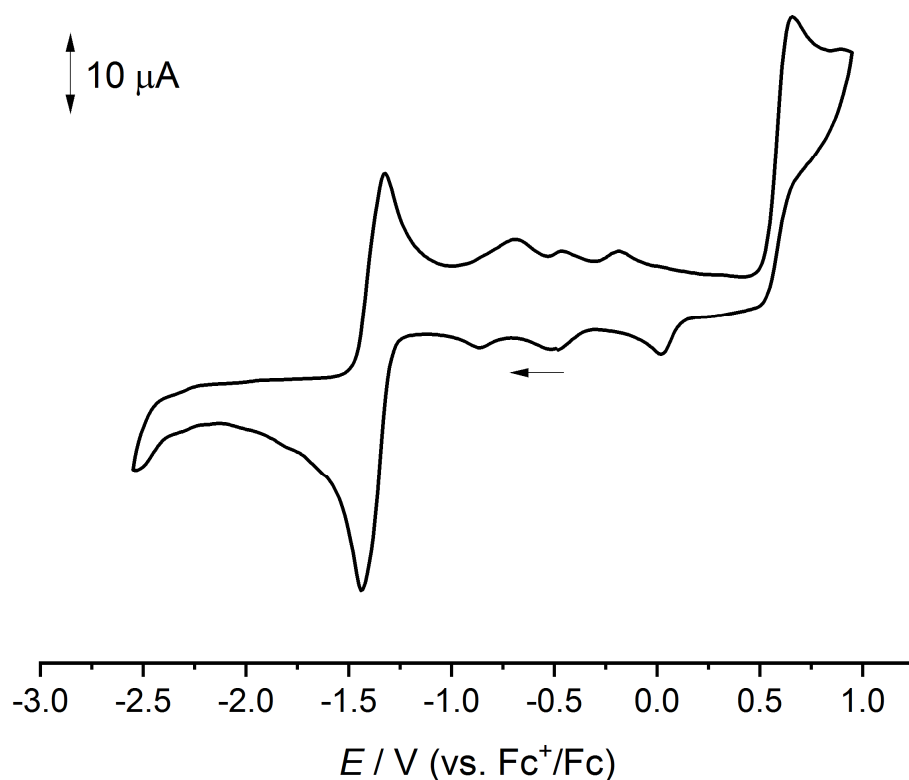

**Figure S5.** Cyclic voltammogram of the oxidation processes of **1a** recorded in MeCN at a scan rate of 25 mV/s (grey curve), 100 mV/s (red curve), and 500 mV/s (blue curve) with NBu<sub>4</sub>PF<sub>6</sub> (0.1 M) as the supporting electrolyte; potentials reported versus the ferrocenium/ferrocene (Fc<sup>+</sup>/Fc) redox couple.

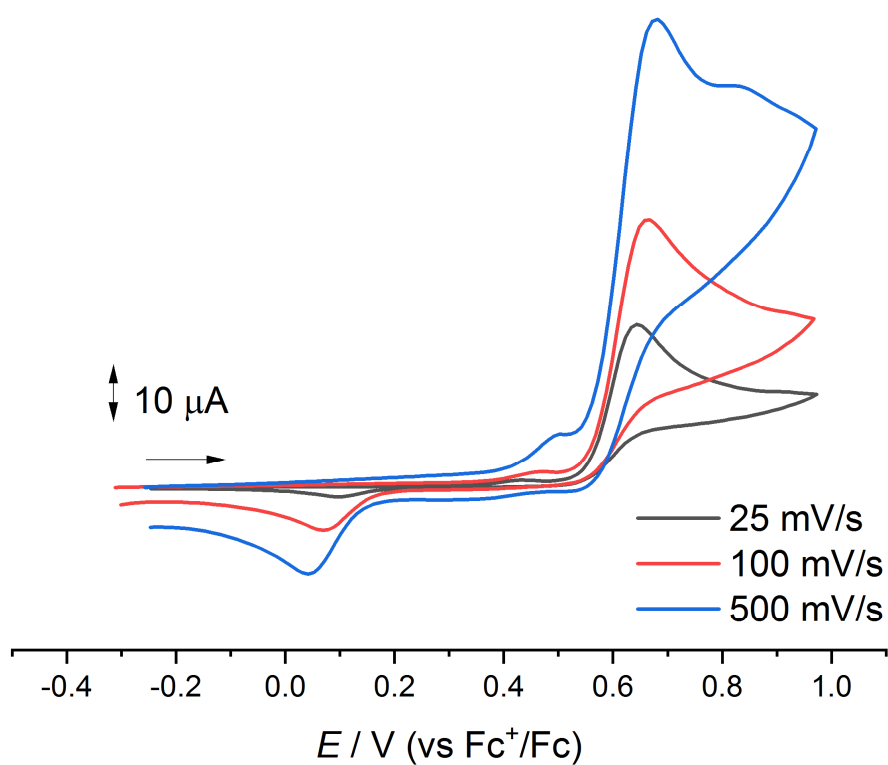

**Figure S6.** Cyclic voltammogram of the reduction processes of **1a** recorded in MeCN at a scan rate of 25 mV/s (grey curve), 100 mV/s (red curve), and 500 mV/s (blue curve) with NBu<sub>4</sub>PF<sub>6</sub> (0.1 M) as the supporting electrolyte; potentials reported versus the ferrocenium/ferrocene (Fc<sup>+</sup>/Fc) redox couple.

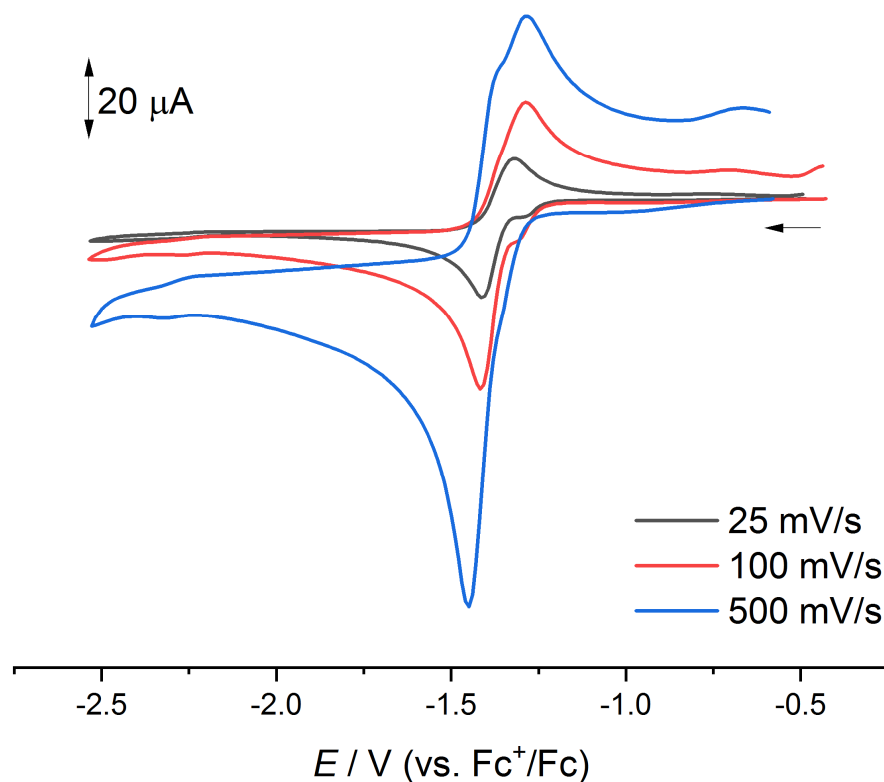

**Figure S7.** Cyclic voltammogram of **1c** recorded in MeCN at a scan rate of 100 mV/s with NBu<sub>4</sub>PF<sub>6</sub> (0.1 M) as the supporting electrolyte; potentials reported versus the ferrocenium/ferrocene (Fc<sup>+</sup>/Fc) redox couple.

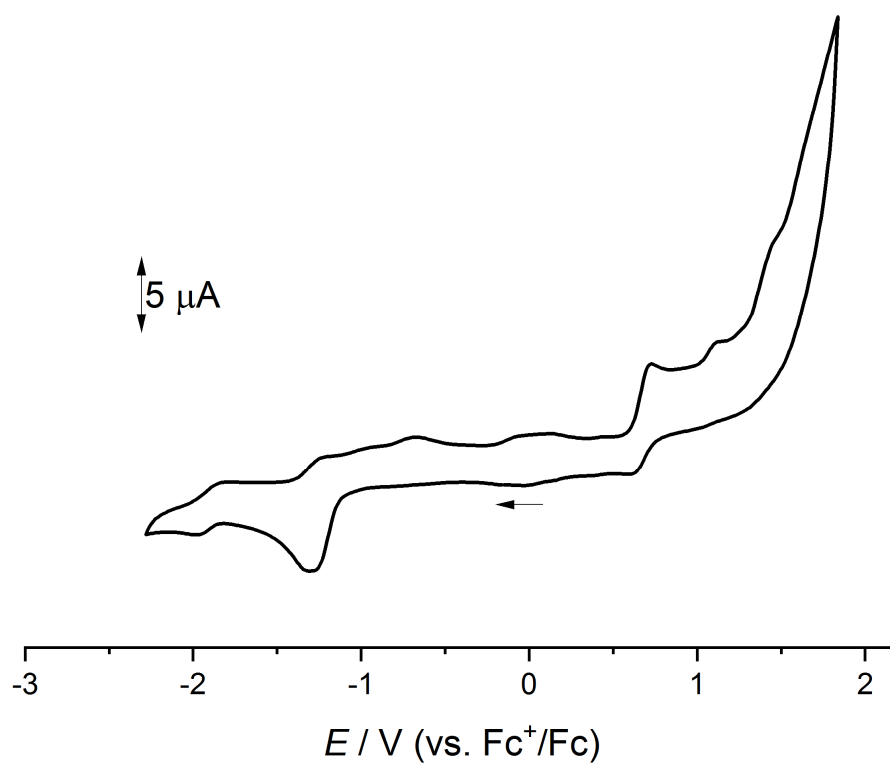

**Figure S8.** Cyclic voltammogram of **1c** recorded in MeCN at a scan rate of 25 mV/s (grey curve), 100 mV/s (red curve), and 500 mV/s (blue curve) with NBu<sub>4</sub>PF<sub>6</sub> (0.1 M) as the supporting electrolyte; potentials reported versus the ferrocenium/ferrocene (Fc<sup>+</sup>/Fc) redox couple.

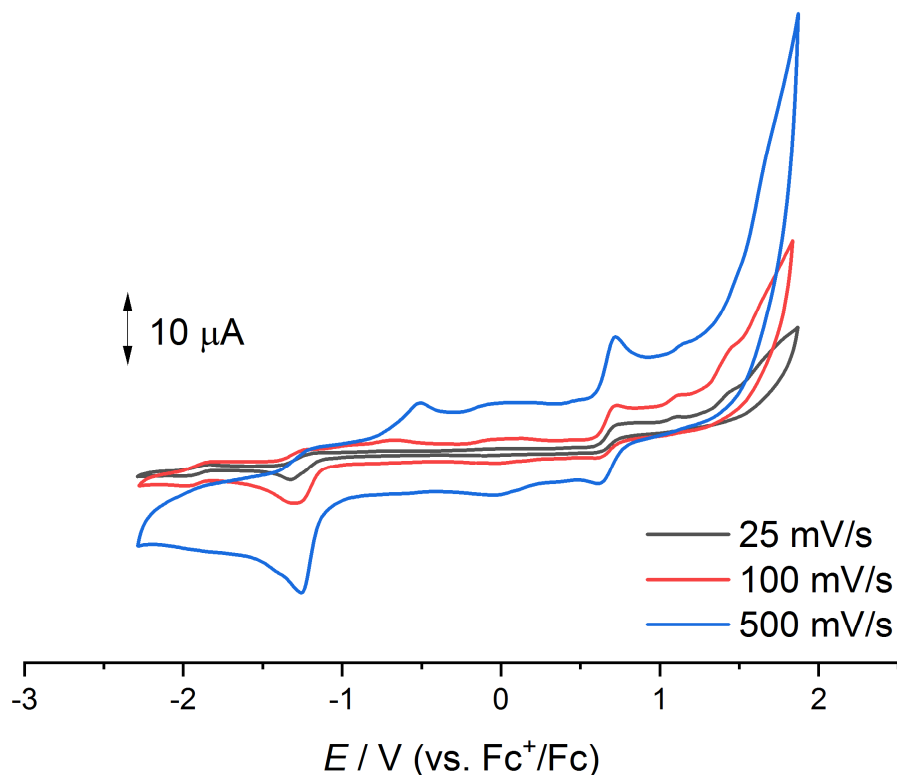

**Figure S9.** Cyclic voltammogram of **2c** recorded in MeCN at a scan rate of 100 mV/s with NBu<sub>4</sub>PF<sub>6</sub> (0.1 M) as the supporting electrolyte; potentials reported versus the ferrocenium/ferrocene (Fc<sup>+</sup>/Fc) redox couple.

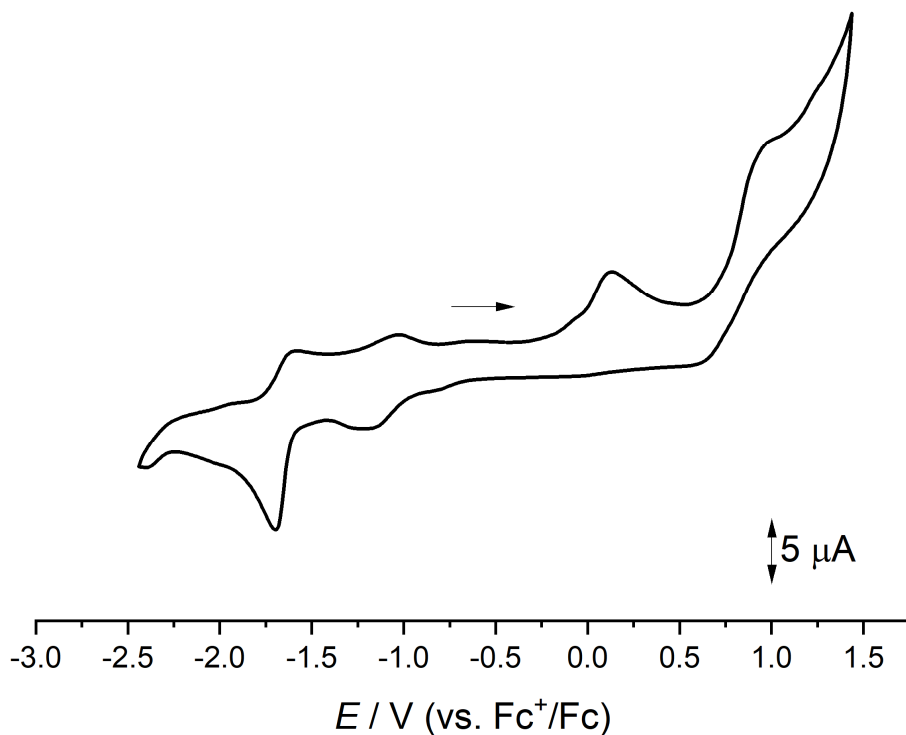

**Figure S10.** Cyclic voltammogram of **2c** recorded in MeCN at a scan rate of 25 mV/s (black curve), 100 mV/s (red curve), and 500 mV/s (blue curve) with NBu<sub>4</sub>PF<sub>6</sub> (0.1 M) as the supporting electrolyte; potentials reported versus the ferrocenium/ferrocene (Fc<sup>+</sup>/Fc) redox couple.

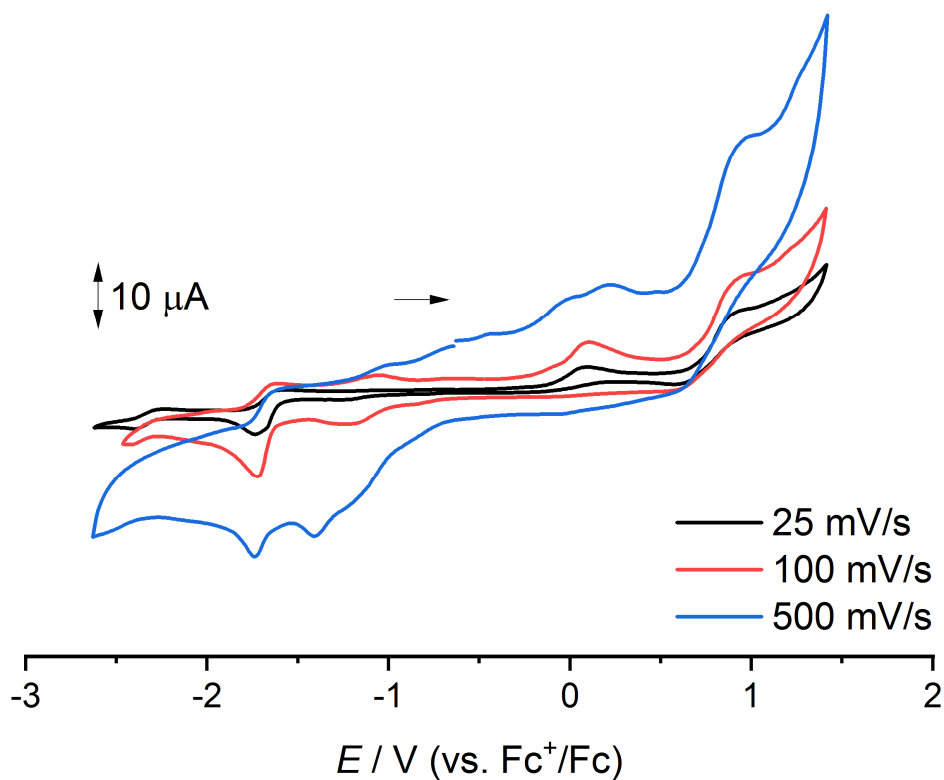

**Figure S11.** Cyclic voltammogram of the reduction of **4c** recorded in MeCN at a scan rate of 100 mV/s with NBu<sub>4</sub>PF<sub>6</sub> (0.1 M) as the supporting electrolyte; potentials reported versus the ferrocenium/ferrocene (Fc<sup>+</sup>/Fc) redox couple.

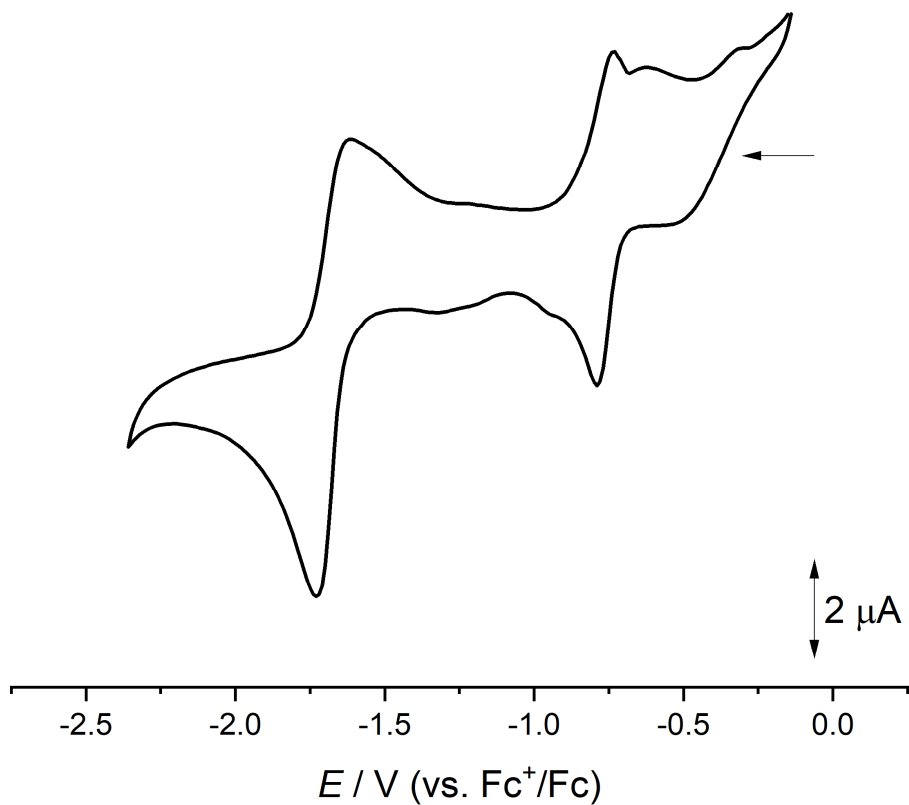

**Figure S12.** Cyclic voltammogram of **5a** recorded in MeCN at a scan rate of 100 mV/s with NBu<sub>4</sub>PF<sub>6</sub> (0.1 M) as the supporting electrolyte (initial scan towards reduction and then oxidation); potentials reported versus the ferrocenium/ferrocene (Fc<sup>+</sup>/Fc) redox couple.

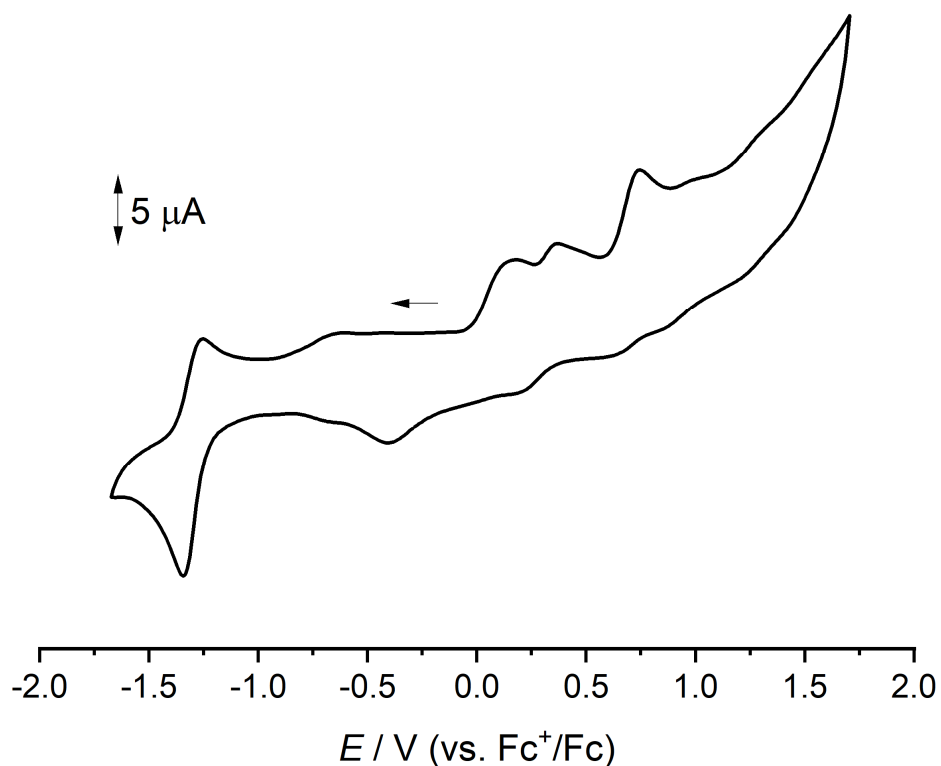

**Figure S13.** Cyclic voltammogram of **5a** recorded in MeCN at a scan rate of 100 mV/s with NBu<sub>4</sub>PF<sub>6</sub> (0.1 M) as the supporting electrolyte (initial scan towards oxidation and then reduction); potentials reported versus the ferrocenium/ferrocene (Fc<sup>+</sup>/Fc) redox couple.

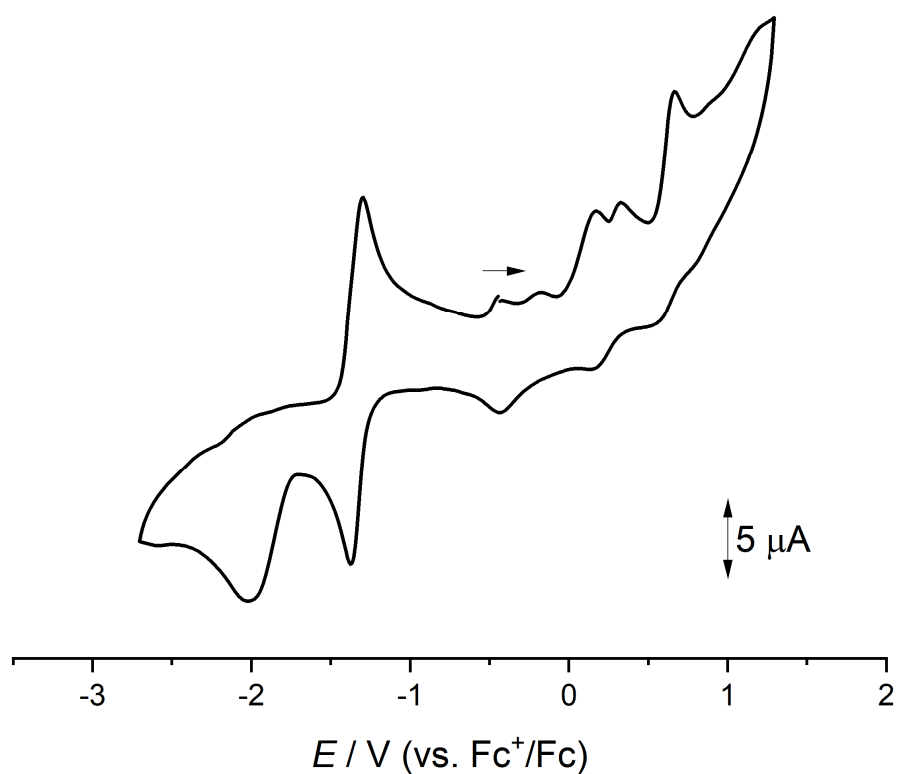

**Figure S14.** Cyclic voltammogram of **5a** (only reduction) recorded in MeCN at a scan rate of 25 mV/s (grey curve) and 100 mV/s (red curve) with  $\text{NBu}_4\text{PF}_6$  (0.1 M) as the supporting electrolyte; potentials reported versus the ferrocenium/ferrocene ( $\text{Fc}^+/\text{Fc}$ ) redox couple.

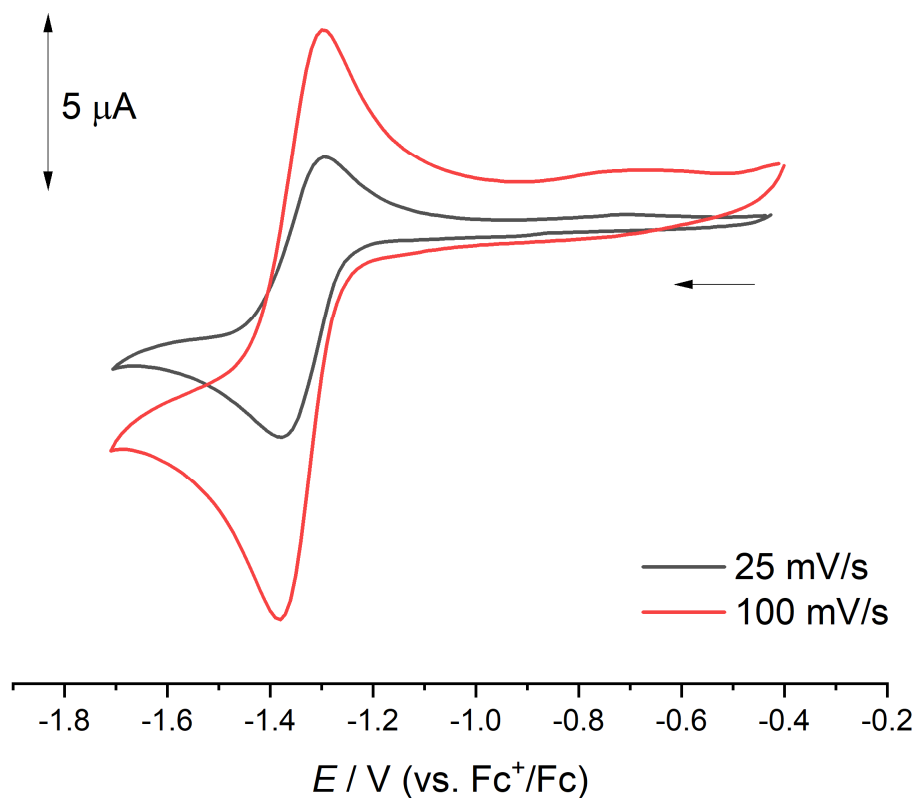

**Figure S15.**  $^1\text{H}$  NMR spectrum (401 MHz,  $\text{CDCl}_3$ ) of  $[\text{Fe}_2\text{Cp}_2(\text{CO})(\mu\text{-CO})\{\mu\text{-}\eta^1\text{:}\eta^3\text{-C}^3(\text{Ph})\text{C}^2(\text{S})\text{C}^1\text{N}(\text{Me})(\text{Xyl})\}]$ , **2b**.

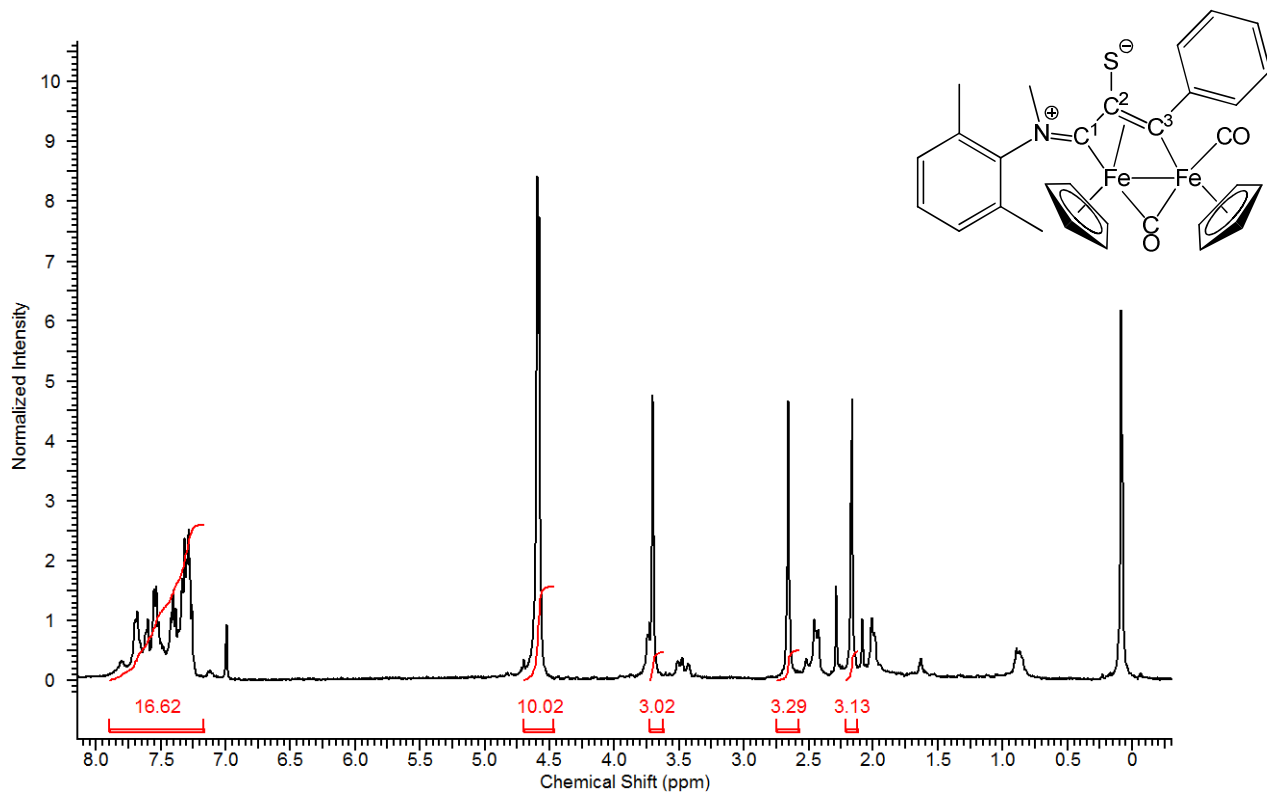

**Figure S16.**  $^{13}\text{C}\{^1\text{H}\}$  NMR spectrum (101 MHz,  $\text{CDCl}_3$ ) of **2b**.

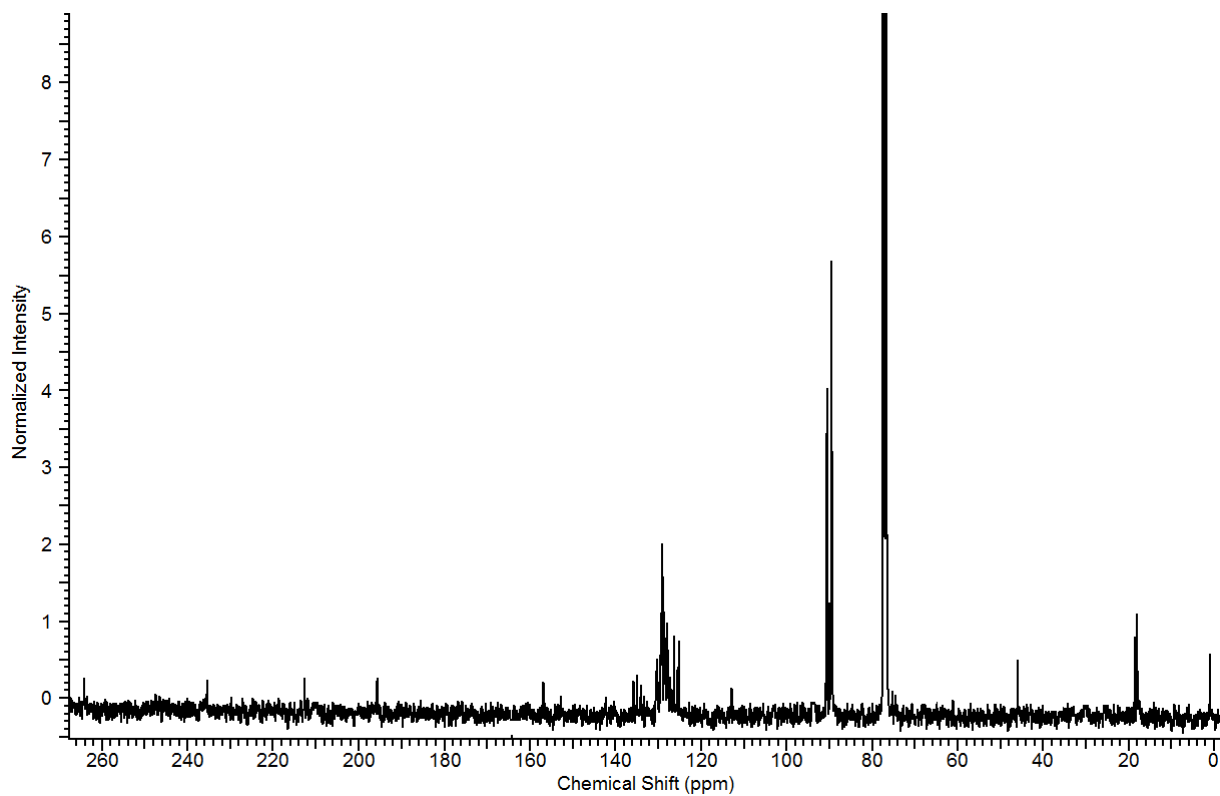

**Figure S17.**  $^1\text{H}$  NMR spectrum (401 MHz,  $\text{CDCl}_3$ ) of  $[\text{Fe}_2\text{Cp}_2(\text{CO})(\mu\text{-CO})\{\mu\text{-}\eta^1\text{:}\eta^3\text{-C}^3(\text{Ph})\text{C}^2(\text{Se})\text{C}^1\text{N}(\text{Me})(\text{Xyl})\}]]$ , **2d**.

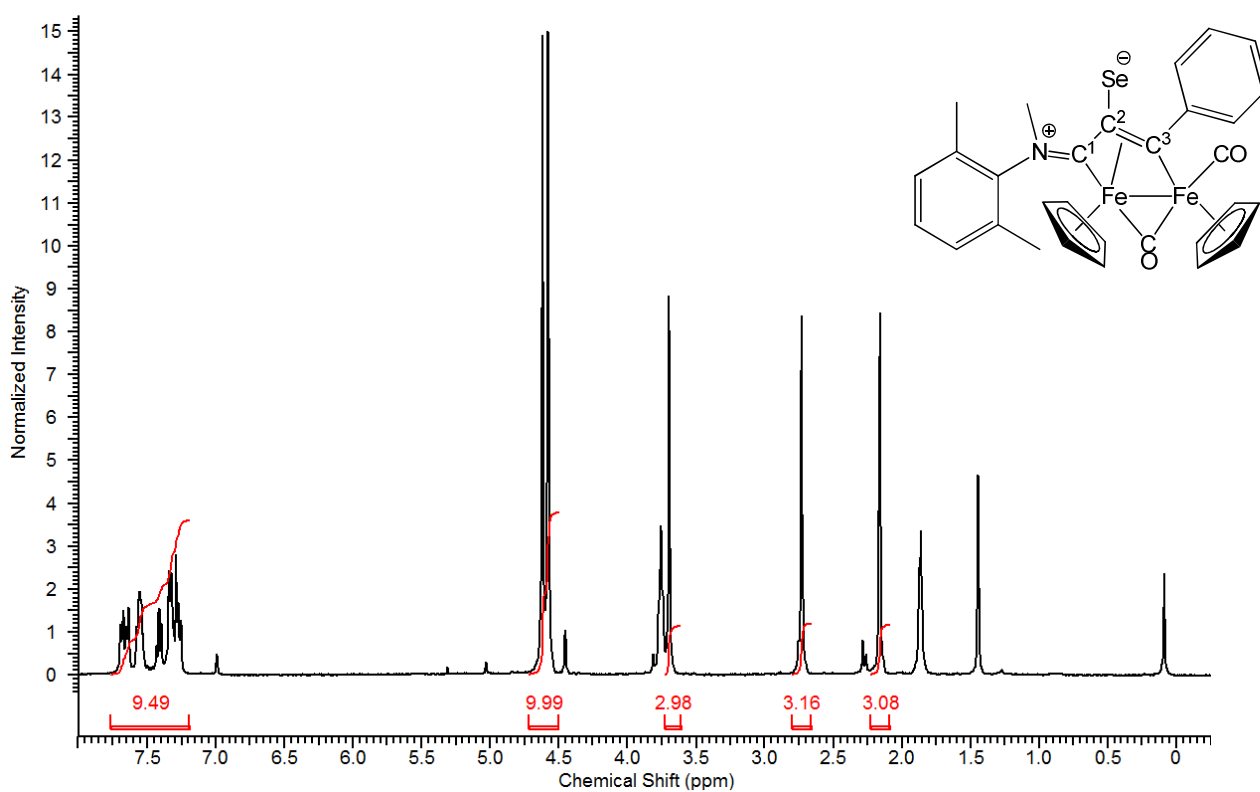

**Figure S18.**  $^{13}\text{C}\{^1\text{H}\}$  NMR spectrum (101 MHz,  $\text{CDCl}_3$ ) of **2d**.

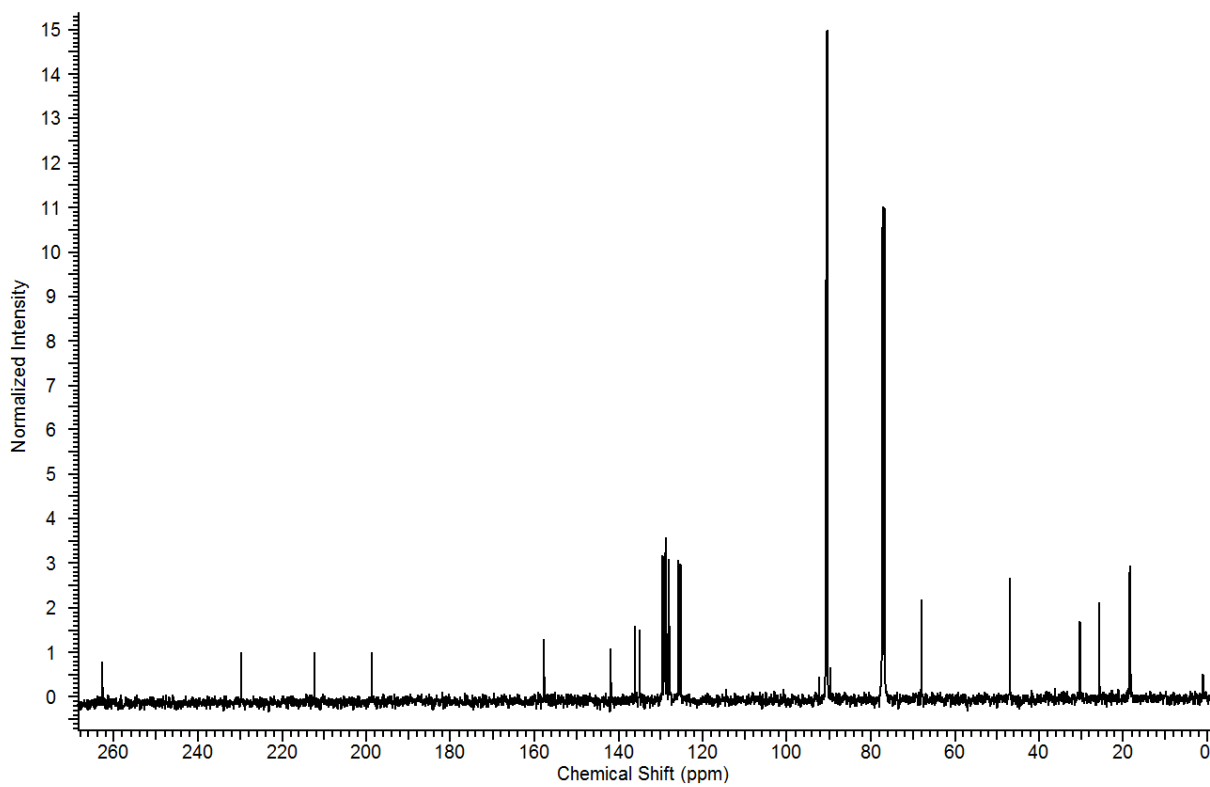

**Figure S19.**  $^{77}\text{Se}$  NMR spectrum (76 MHz,  $\text{CDCl}_3$ ) of **2d**.

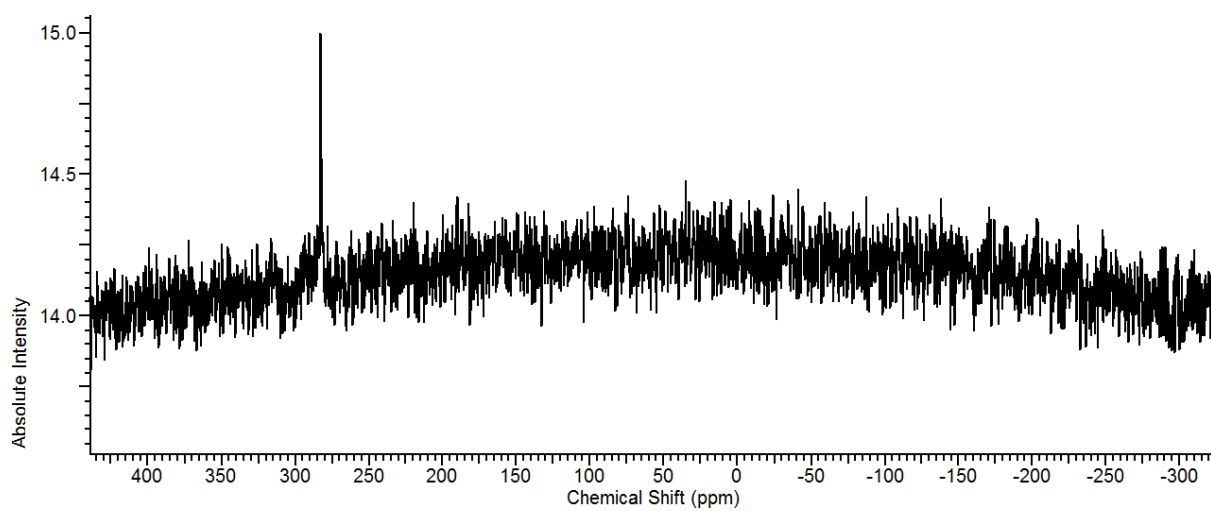

**Figure S20.**  $^1\text{H}$  NMR spectrum (401 MHz, acetone- $d_6$ ) of  $[\text{FeCp}(\text{CO})\{\text{C}^1(\text{NMe}_2)\text{C}^2\text{HC}^3(\text{Me})\text{Se}\}]$ , **3**.

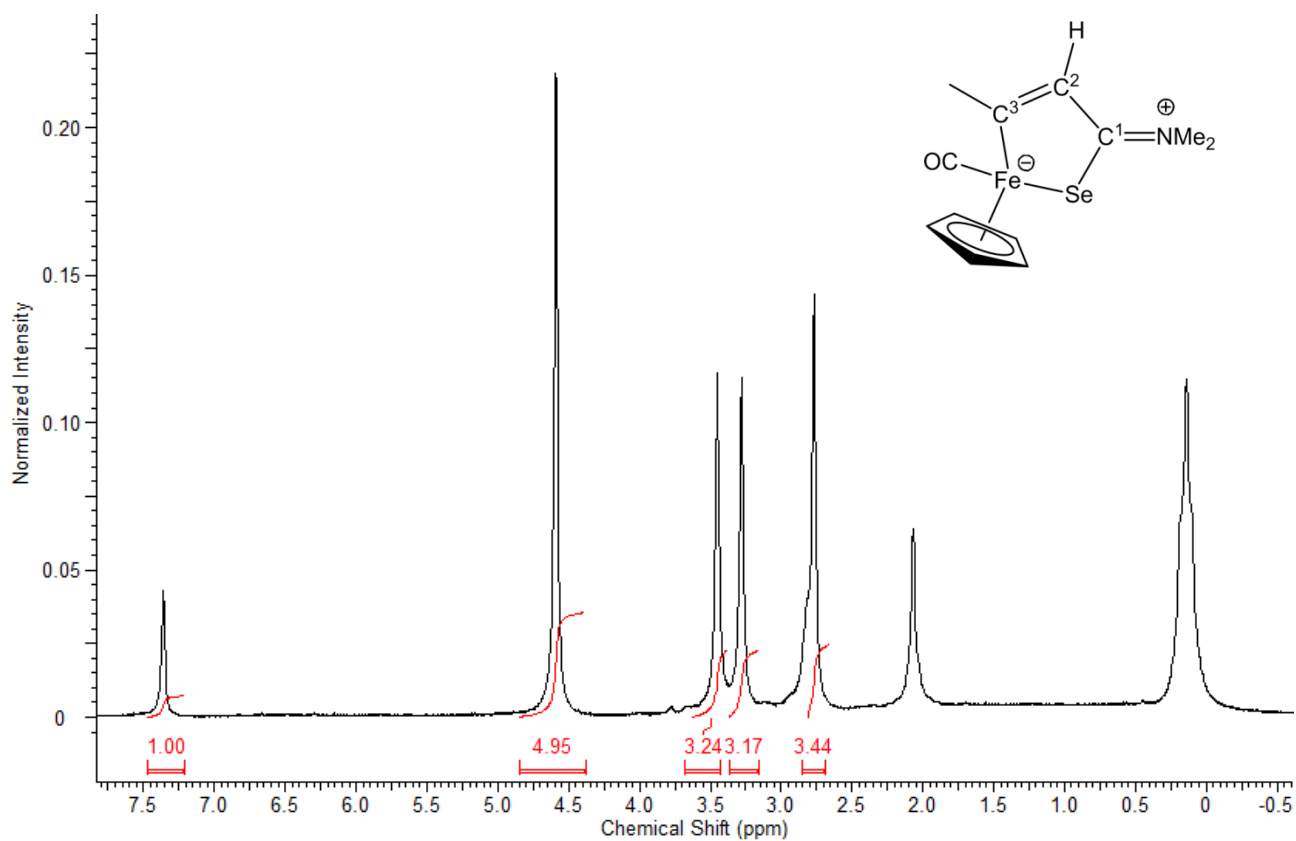

**Figure S21.**  $^{13}\text{C}\{^1\text{H}\}$  NMR spectrum (101 MHz, acetone- $d_6$ ) of **3**.

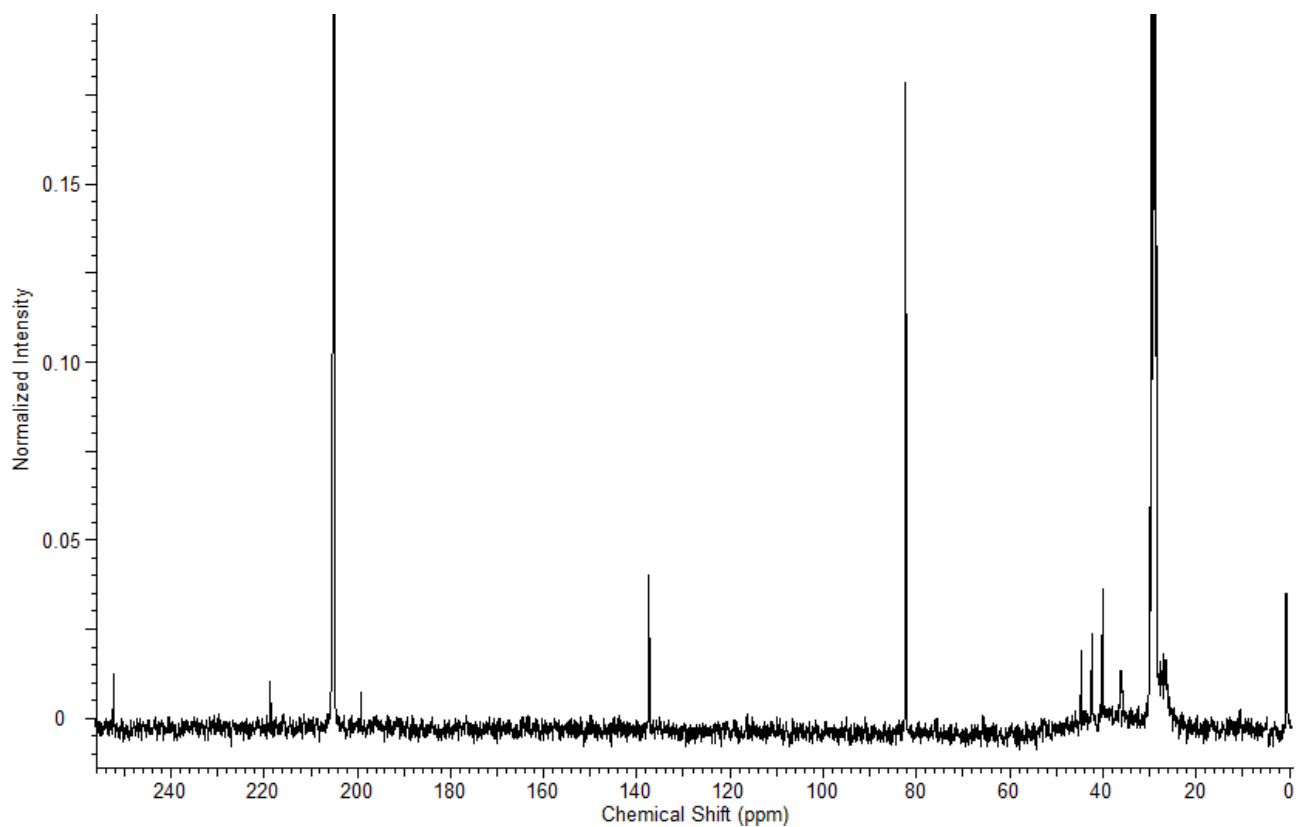

**Figure S22.**  $^{77}\text{Se}$  NMR spectrum (76 MHz, acetone- $d_6$ ) of **3**.

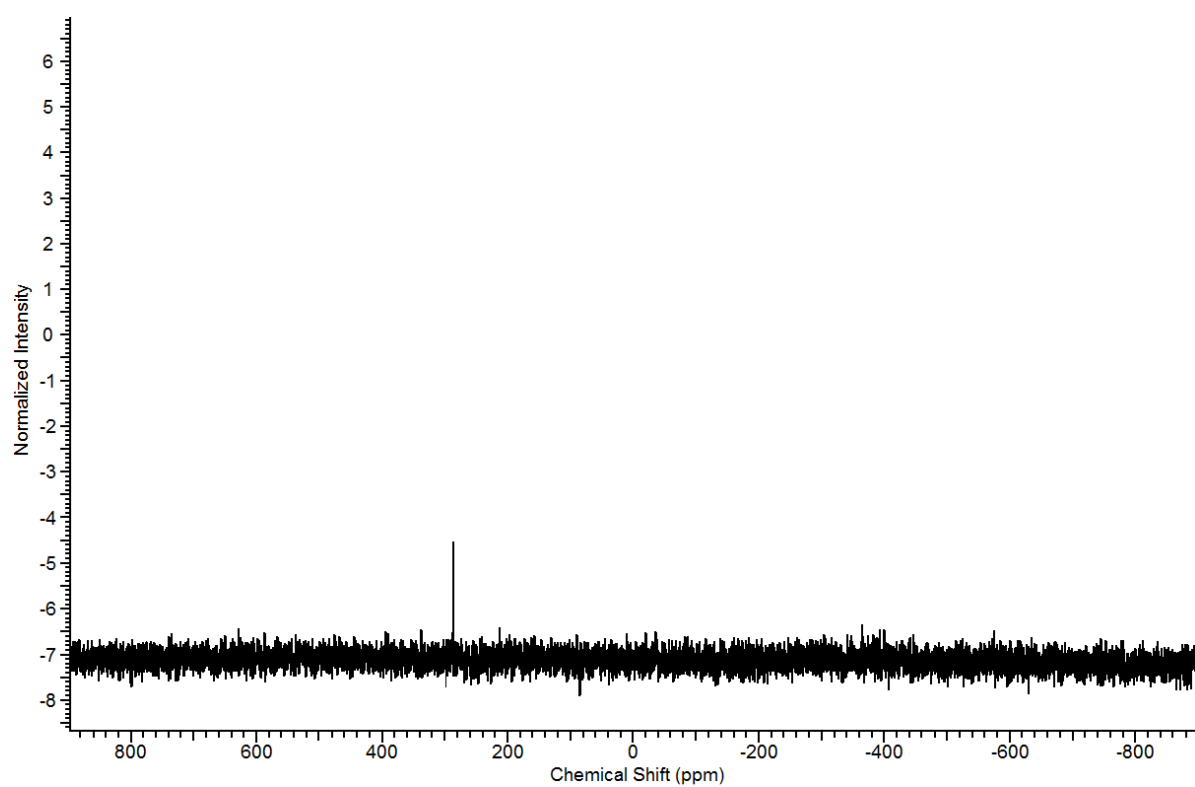

**Figure S23.**  $^1\text{H}$  NMR spectrum (401 MHz, acetone- $d_6$ ) of  $[\text{Fe}_2\text{Cp}_2(\text{CO})(\mu\text{-CO})\{\mu\text{-}\eta^1\text{:}\eta^3\text{-C}^3(\text{Me})\text{C}^2(\text{Se})\text{C}^1\text{NMe}_2\}\}_2[\text{I}]_2$ , **4a**.

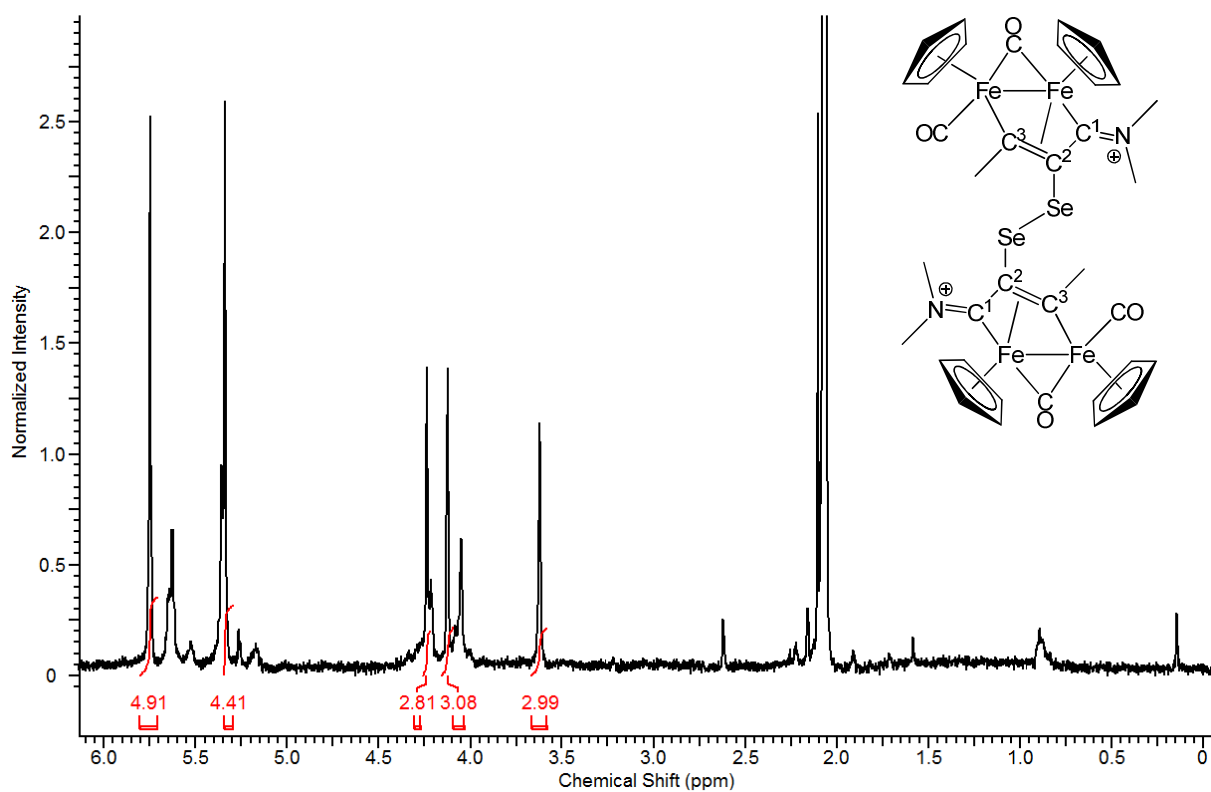

**Figure S24.**  $^{13}\text{C}\{^1\text{H}\}$  NMR spectrum (101 MHz, acetone- $d_6$ ) of **4a**.

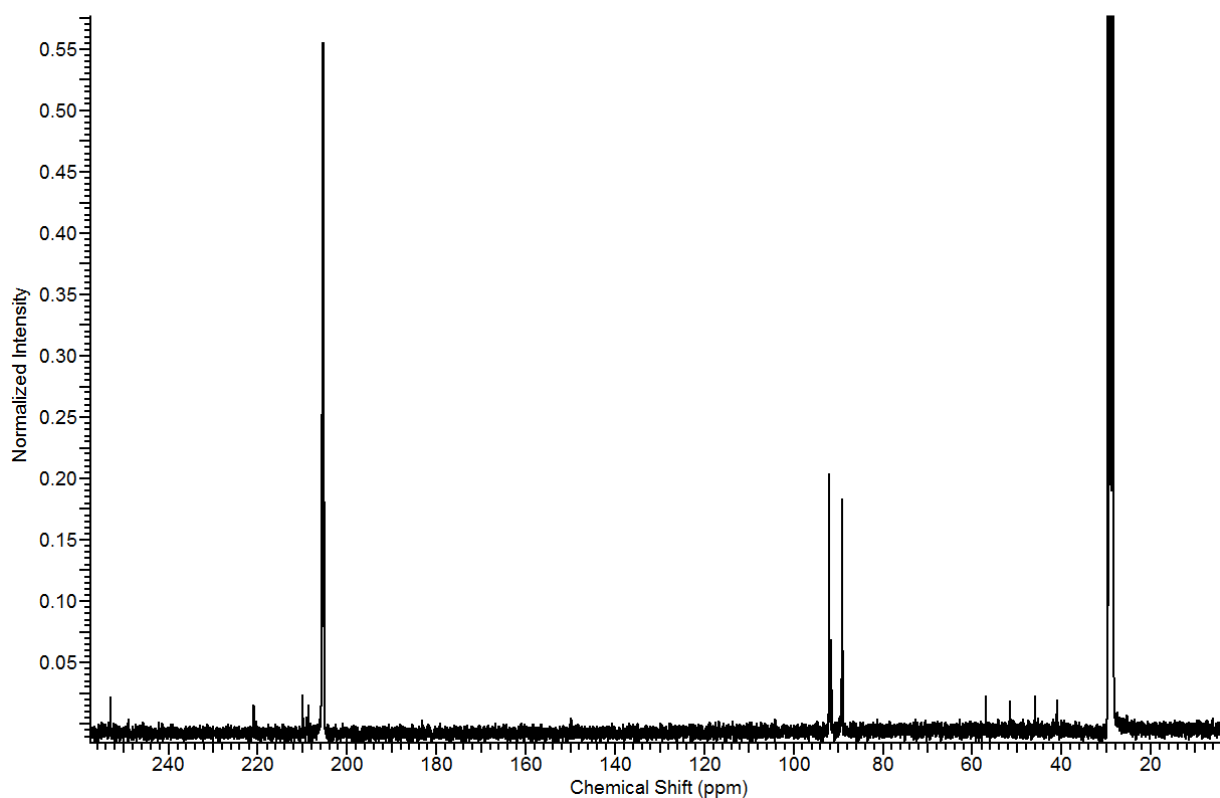

**Figure S25.**  $^{77}\text{Se}$  NMR spectrum (76 MHz,  $\text{dms}\text{-d}_6$ ) of **4a**.

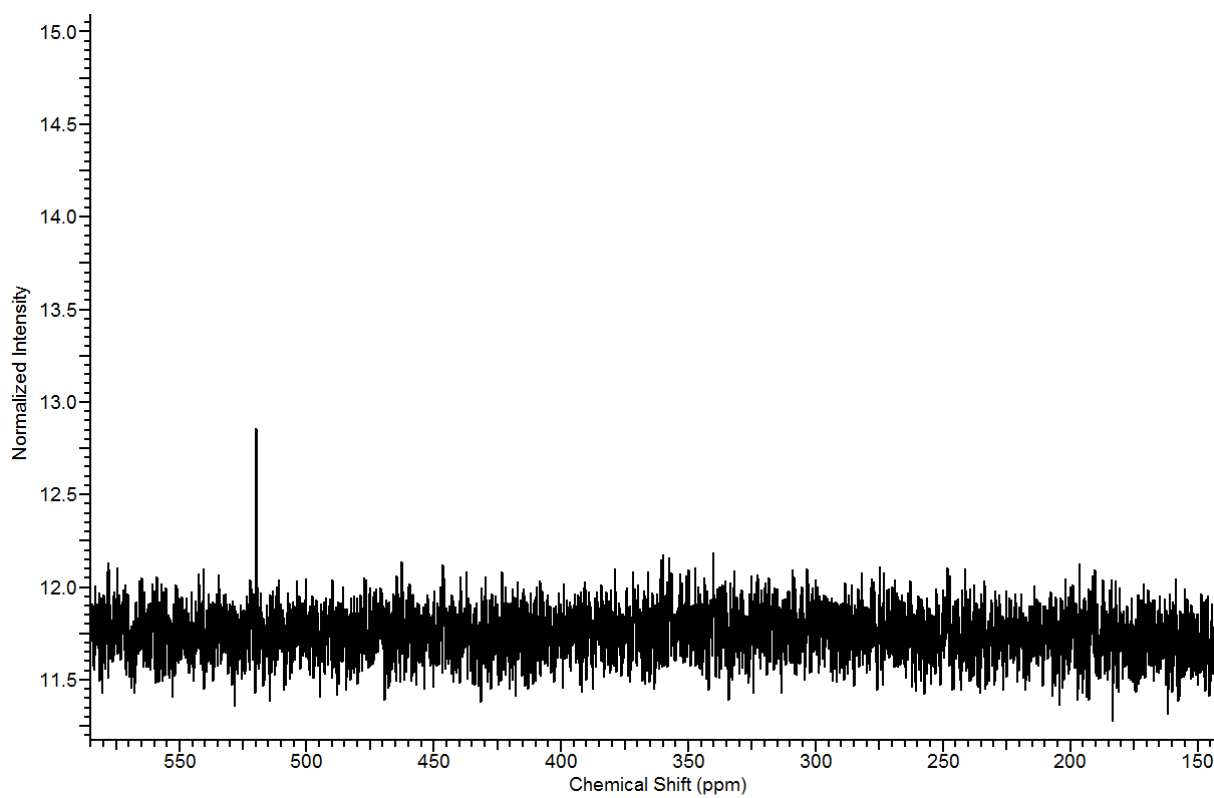

**Figure S26.**  $^1\text{H}$  NMR spectrum (401 MHz,  $\text{CD}_2\text{Cl}_2$ ) of  $[\text{Fe}_2\text{Cp}_2(\text{CO})(\mu\text{-CO})\{\mu\text{-}\eta^1\text{:}\eta^3\text{-C}^3(\text{Ph})\text{C}^2(\text{S})\text{C}^1\text{N}(\text{Me})(\text{Xyl})\}\}_2][\text{I}]_2$ , **4b**.

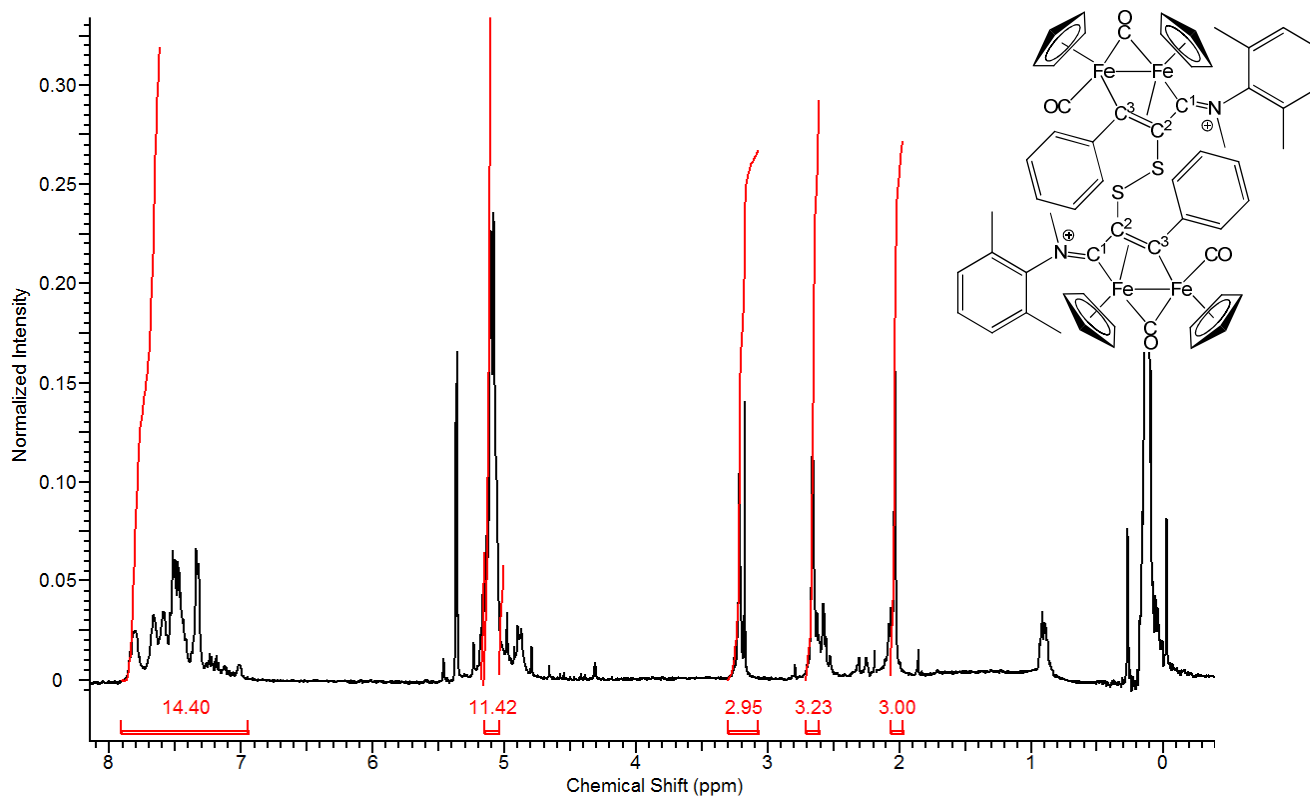

**Figure S27.**  $^{13}\text{C}\{^1\text{H}\}$  NMR spectrum (101 MHz,  $\text{CD}_2\text{Cl}_2$ ) of **4b**.

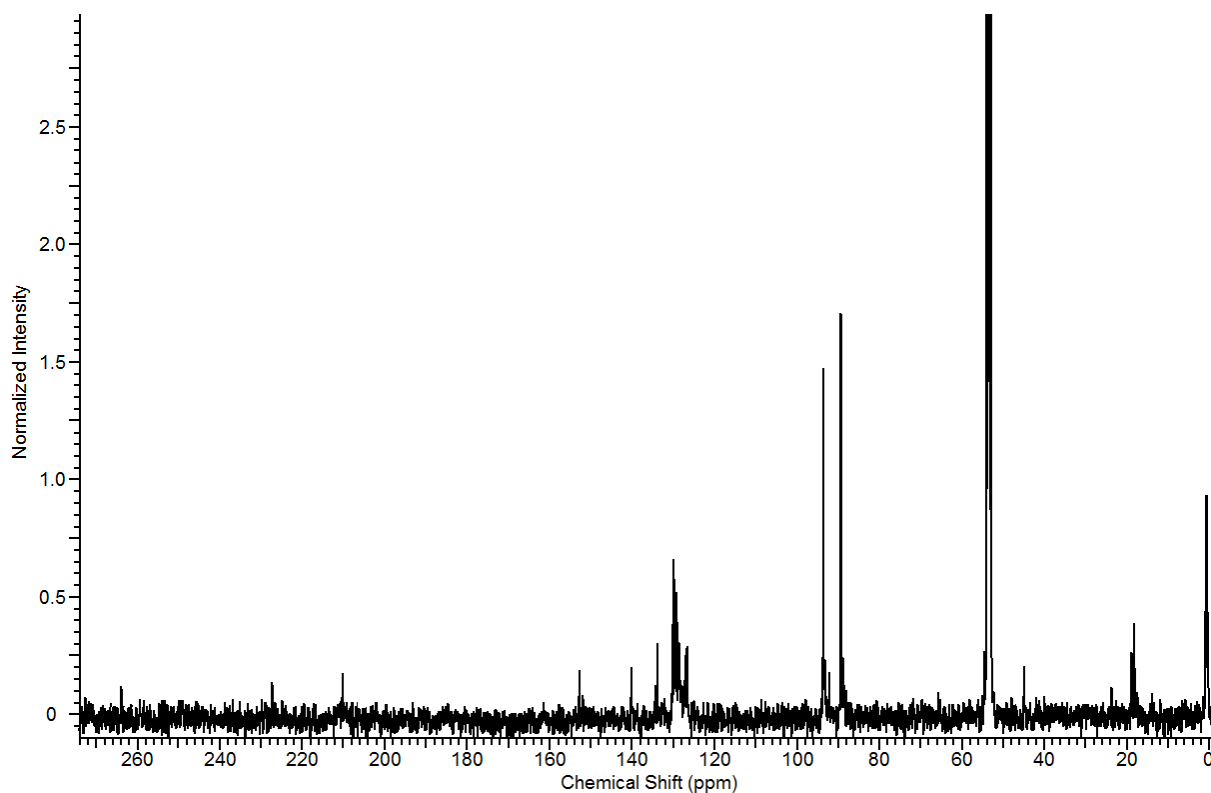

**Figure S28.**  $^1\text{H}$  NMR spectrum (401 MHz,  $\text{CD}_3\text{CN}$ ) of  $[\text{Fe}_2\text{Cp}_2(\text{CO})(\mu\text{-CO})\{\mu\text{-}\eta^1\text{:}\eta^3\text{-C}^3(\text{Ph})\text{C}^2(\text{Se})\text{C}^1\text{N}(\text{Me})(\text{Xyl})\}\}_2][\text{I}]_2$ , **4d**.

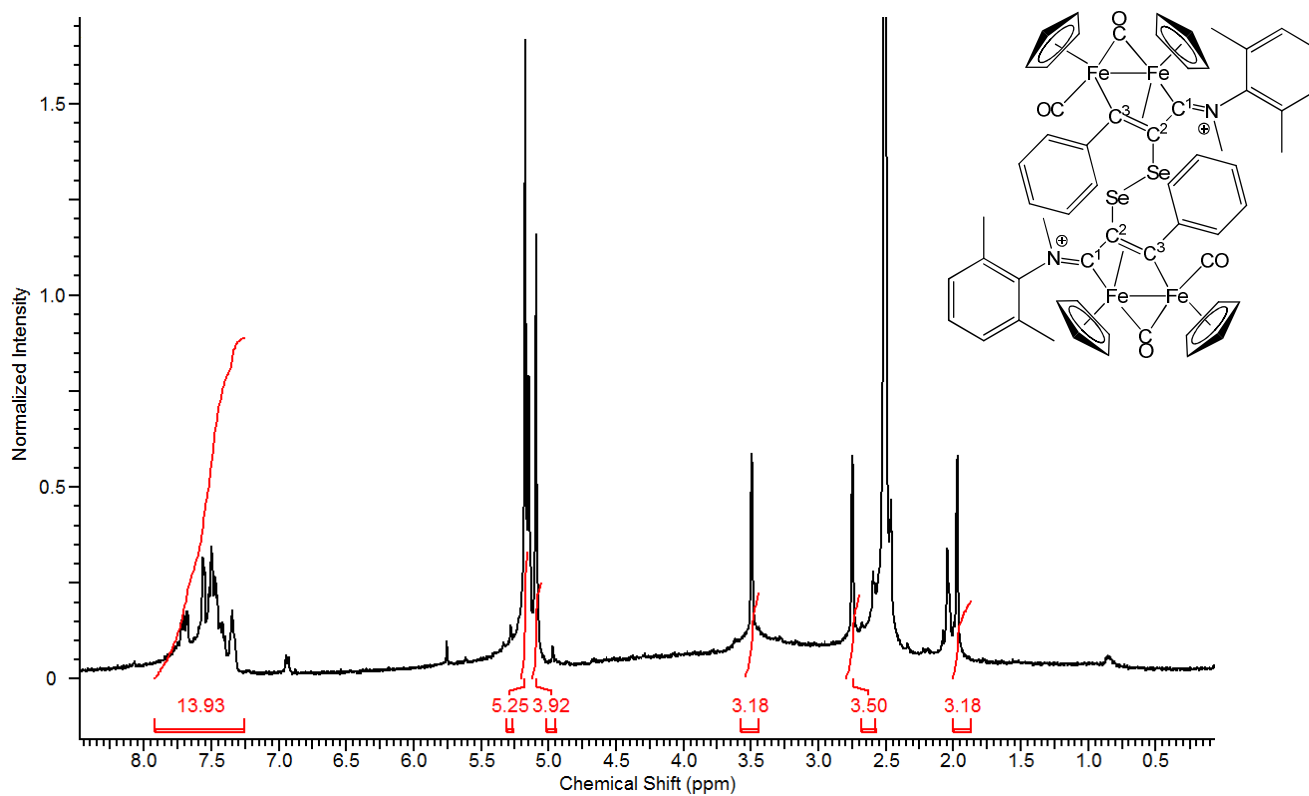

**Figure S29.**  $^{77}\text{Se}$  NMR spectrum (76 MHz,  $\text{dms}\text{-}d_6$ ) of **4d**.

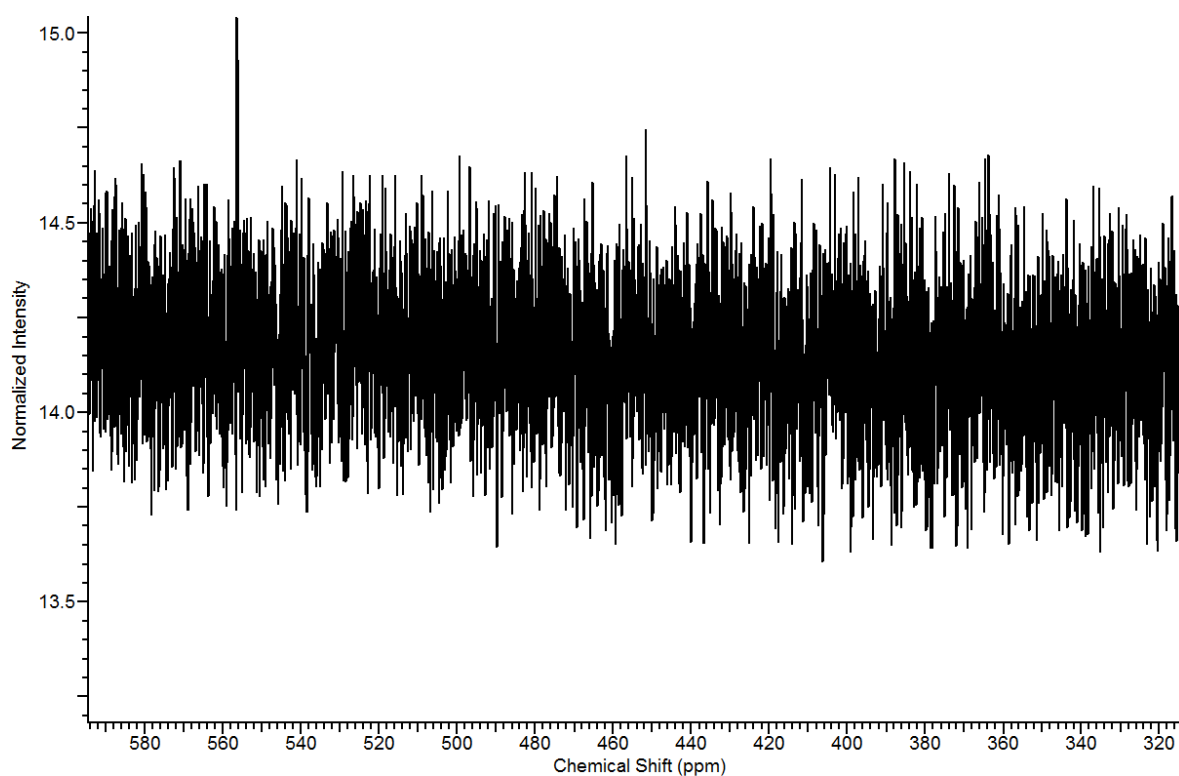

**Figure S30.**  $^1\text{H}$  NMR spectrum (401 MHz, acetone- $d_6$ ) of  $[\text{Fe}_2\text{Cp}_2(\text{CO})(\mu\text{-CO})\{\mu\text{-}\eta^1\text{:}\eta^3\text{-C}^3(\text{Me})\text{C}^2(\text{SeMe})\text{C}^1\text{NMe}_2\}\text{I}]^+$ , **5a**.

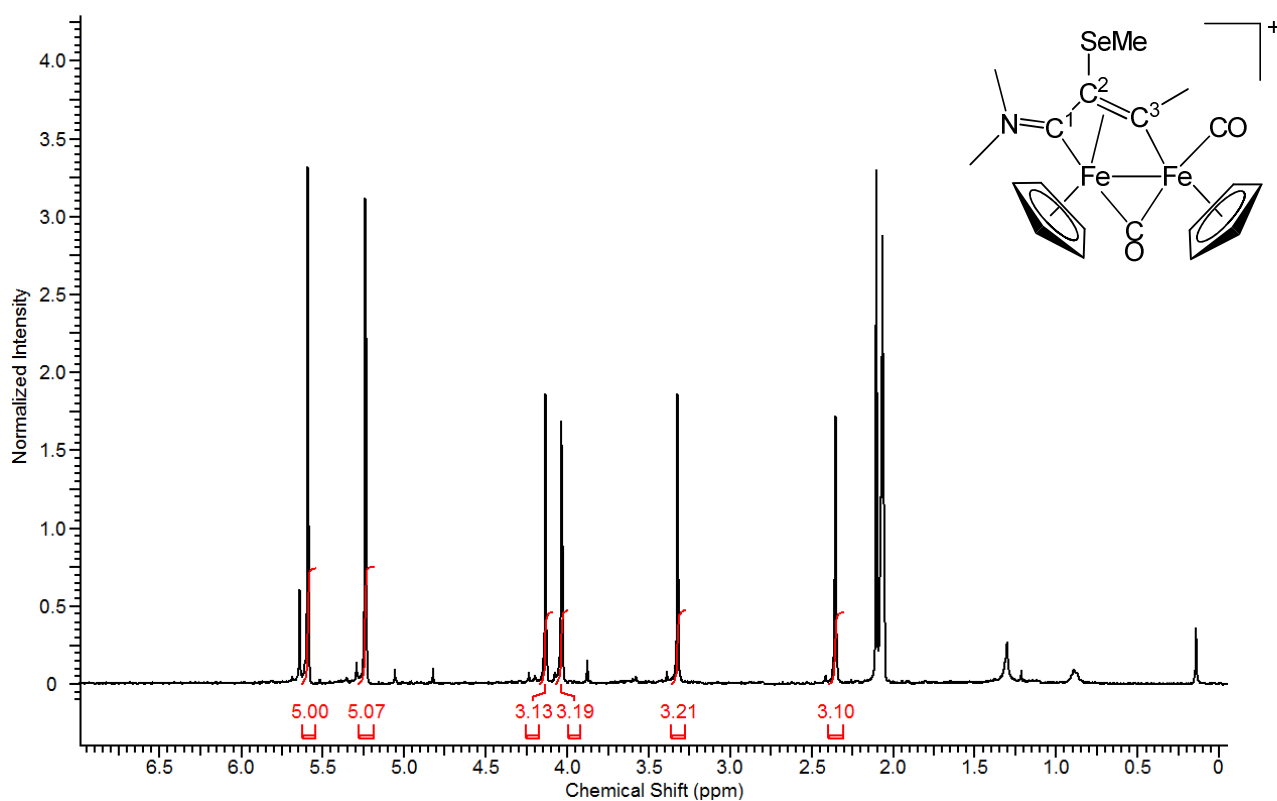

**Figure S31.**  $^{13}\text{C}\{^1\text{H}\}$  NMR spectrum (101 MHz, acetone- $d_6$ ) of **5a**.

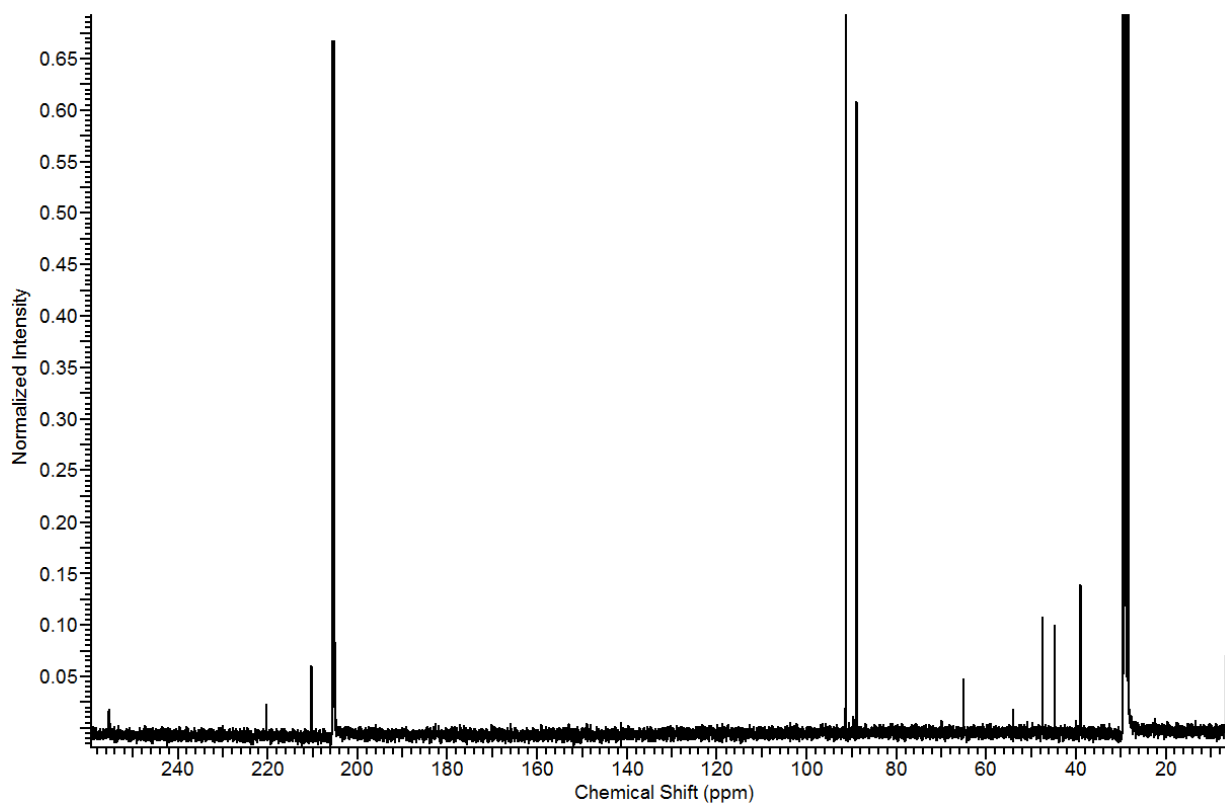

**Figure S32.**  $^{77}\text{Se}$  NMR spectrum (76 MHz,  $\text{dms}\text{-d}_6$ ) of **5a**.

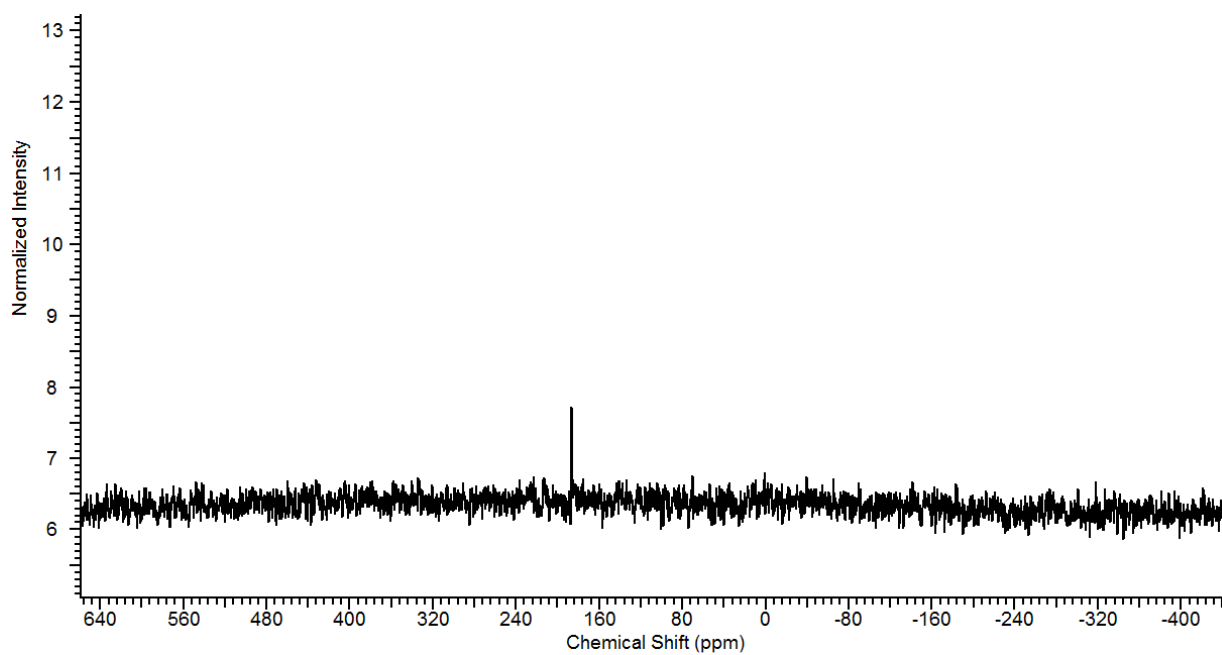

**Figure S33.**  $^1\text{H}$  NMR spectrum (401 MHz,  $\text{CDCl}_3$ ) of  $[\text{Fe}_2\text{Cp}_2(\text{CO})(\mu\text{-CO})\{\mu\text{-}\eta^1\text{:}\eta^3\text{-C}^3(\text{Ph})\text{C}^2(\text{Se})\text{C}^1\text{N}(\text{Me})(\text{Xyl})\}]\text{I}$ , **5b**.

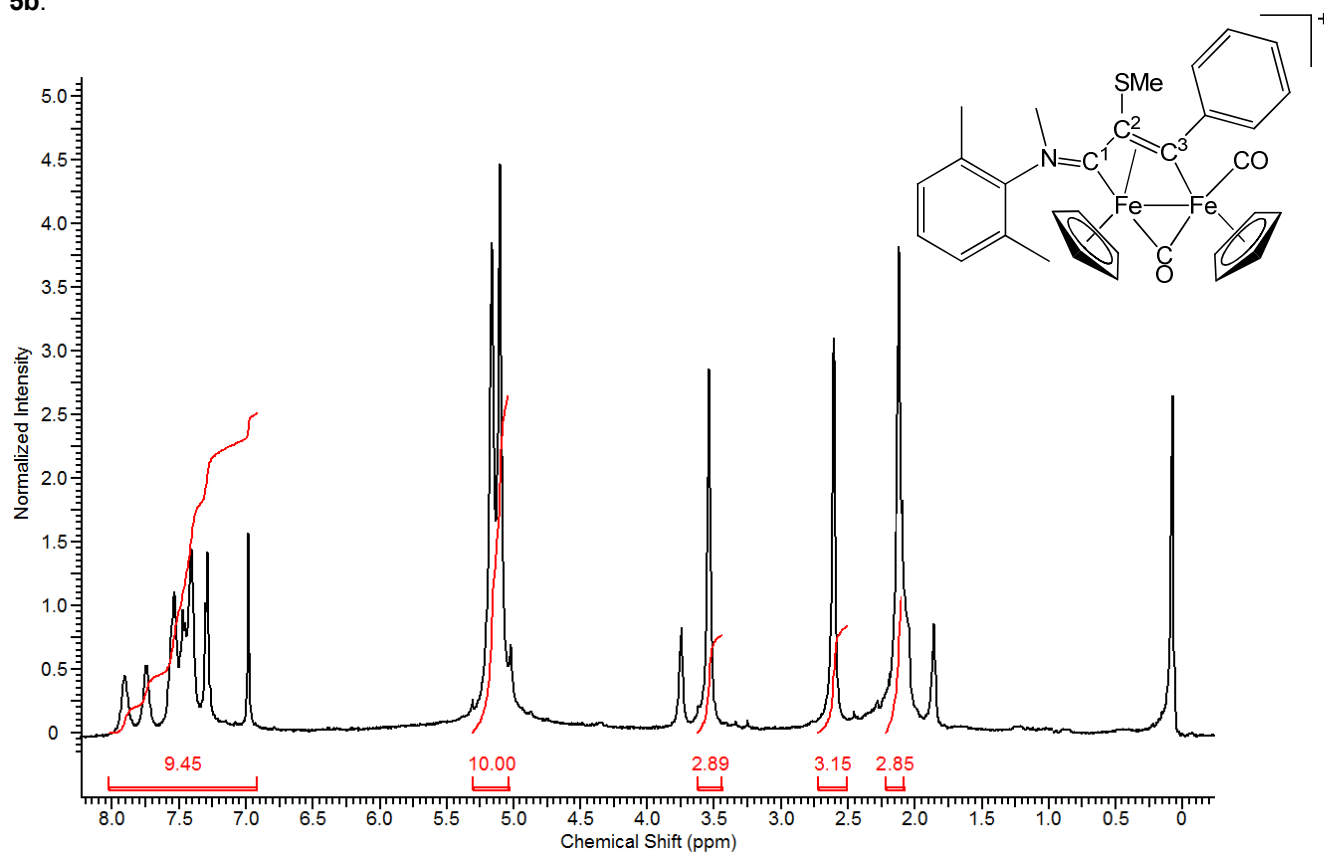

**Figure S34.**  $^{13}\text{C}\{^1\text{H}\}$  NMR spectrum (101 MHz,  $\text{CDCl}_3$ ) of **5b**.

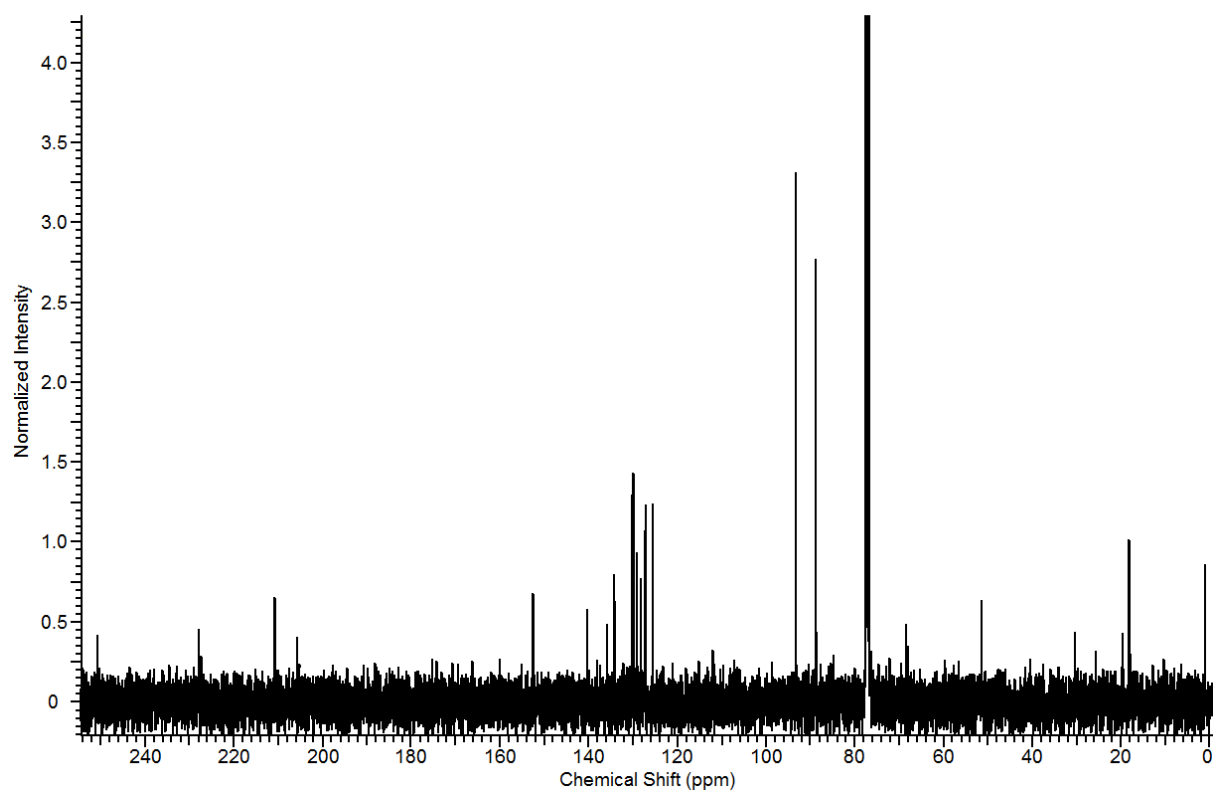

Supplement: s1 [file s1]
