# Supplementary material for: Mono-, Di- and Tetra-iron Complexes with Selenium or Sulphur Functionalized Vinyliminium Ligands: Synthesis, Structural Characterization and Antiproliferative Activity
Source: Molecules. 2020 Apr 3;25(7):1656. doi: 10.3390/molecules25071656 (PMC7180837; doi:10.3390/molecules25071656)
Supplement: Supplementary file 1 [file molecules-25-01656-s001.zip]

Archive with 5 entries (4 files):
- Supporting Material/
- Supporting Material/checkcif.pdf
- Supporting Material/cif.cif
- Supporting Material/DFT coordinates.xyz
- Supporting Material/Supporting Information.pdf
