# Supplementary material for: Mono-, Di- and Tetra-iron Complexes with Selenium or Sulphur Functionalized Vinyliminium Ligands: Synthesis, Structural Characterization and Antiproliferative Activity
Source: Molecules. 2020 Apr 3;25(7):1656. doi: 10.3390/molecules25071656 (PMC7180837; doi:10.3390/molecules25071656)
Supplement: Supplementary file 1 [file molecules-25-01656-s001.zip › Supporting Material/cif.cif]

 
data_3
 
_audit_creation_method            'SHELXL-2014/7'
_shelx_SHELXL_version_number      '2014/7'
_chemical_name_systematic         ?
_chemical_name_common             ?
_chemical_melting_point           ?
_chemical_formula_moiety          ?
_chemical_formula_sum
 'C12 H15 Fe N O Se' 
_chemical_formula_weight          324.06

loop_
 _atom_type_symbol
 _atom_type_description
 _atom_type_scat_dispersion_real
 _atom_type_scat_dispersion_imag
 _atom_type_scat_source
 'C'  'C'   0.0033   0.0016
 'International Tables Vol C Tables 4.2.6.8 and 6.1.1.4'
 'H'  'H'   0.0000   0.0000
 'International Tables Vol C Tables 4.2.6.8 and 6.1.1.4'
 'Fe'  'Fe'   0.3463   0.8444
 'International Tables Vol C Tables 4.2.6.8 and 6.1.1.4'
 'Se'  'Se'  -0.0929   2.2259
 'International Tables Vol C Tables 4.2.6.8 and 6.1.1.4'
 'O'  'O'   0.0106   0.0060
 'International Tables Vol C Tables 4.2.6.8 and 6.1.1.4'
 'N'  'N'   0.0061   0.0033
 'International Tables Vol C Tables 4.2.6.8 and 6.1.1.4'
 
_space_group_crystal_system       monoclinic
_space_group_IT_number            7
_space_group_name_H-M_alt         'P c'
_space_group_name_Hall            'P -2yc'
 
_shelx_space_group_comment
;
The symmetry employed for this shelxl refinement is uniquely defined
by the following loop, which should always be used as a source of
symmetry information in preference to the above space-group names.
They are only intended as comments.
;
 
loop_
 _space_group_symop_operation_xyz
 'x, y, z'
 'x, -y, z+1/2'
 
_cell_length_a                    13.454(3)
_cell_length_b                    7.675(2)
_cell_length_c                    12.285(2)
_cell_angle_alpha                 90.00(3)
_cell_angle_beta                  99.07(3)
_cell_angle_gamma                 90.00(3)
_cell_volume                      1252.5(5)
_cell_formula_units_Z             4
_cell_measurement_temperature     100(2)
_cell_measurement_reflns_used     5523
_cell_measurement_theta_min       2.6565
_cell_measurement_theta_max       26.376
 
_exptl_crystal_description        plate
_exptl_crystal_colour             orange
_exptl_crystal_density_meas       ?
_exptl_crystal_density_method     ?
_exptl_crystal_density_diffrn     1.719          
_exptl_crystal_F_000              648
_exptl_transmission_factor_min    ?
_exptl_transmission_factor_max    ?
_exptl_crystal_size_max           0.210
_exptl_crystal_size_mid           0.190
_exptl_crystal_size_min           0.150
_exptl_absorpt_coefficient_mu     4.088
_shelx_estimated_absorpt_T_min    0.481
_shelx_estimated_absorpt_T_max    0.579
_exptl_absorpt_correction_type    empirical
_exptl_absorpt_correction_T_min   0.354623
_exptl_absorpt_correction_T_max   0.745372
_exptl_absorpt_process_details    
; 
 Data were corrected for Lorentz polarization and absorption
 effects (empirical absorption correction SADABS).
 R(int) =  0.1515 (selected reflections only, before parameter refinement)
 R(int) =  0.0825 (selected reflections only, after parameter refinement)
;
_exptl_absorpt_special_details    ?
_diffrn_ambient_temperature       100(2)
_diffrn_radiation_wavelength      0.71073
_diffrn_radiation_type            MoK\a
_diffrn_source                    'fine-focus sealed tube'
_diffrn_measurement_device_type   'PHOTON100 area detector'
_diffrn_measurement_method        'phi and omega scans'
_diffrn_detector_area_resol_mean  ?
_diffrn_reflns_number             11149
_diffrn_reflns_av_unetI/netI      0.1383
_diffrn_reflns_av_R_equivalents   0.0687
_diffrn_reflns_limit_h_min        0
_diffrn_reflns_limit_h_max        15
_diffrn_reflns_limit_k_min        -9
_diffrn_reflns_limit_k_max        0
_diffrn_reflns_limit_l_min        -14
_diffrn_reflns_limit_l_max        14
_diffrn_reflns_theta_min          1.533
_diffrn_reflns_theta_max          24.999
_diffrn_reflns_theta_full         24.999
_diffrn_measured_fraction_theta_max   0.985
_diffrn_measured_fraction_theta_full  0.986
_diffrn_reflns_Laue_measured_fraction_max    0.985
_diffrn_reflns_Laue_measured_fraction_full   0.986
_diffrn_reflns_point_group_measured_fraction_max   0.494
_diffrn_reflns_point_group_measured_fraction_full  0.494
_reflns_number_total              2119
_reflns_number_gt                 1870
_reflns_threshold_expression      'I > 2\s(I)'
_reflns_Friedel_coverage          0.000
_reflns_Friedel_fraction_max      0.000
_reflns_Friedel_fraction_full     0.000
 
_reflns_special_details
;
 _reflns_Friedel_fraction is defined as the number of unique
 Friedel pairs measured divided by the number that would be
 possible theoretically, ignoring centric projections and
 systematic absences.
;
 
_computing_data_collection        'APEX3 (Bruker AXS, 2015)' 
_computing_cell_refinement        'APEX3 (Bruker AXS, 2015)' 
_computing_data_reduction         'SAINT (Bruker AXS, 2015)' 
_computing_structure_solution     'SHELXT (Sheldrick, 2015)'
_computing_structure_refinement 'SHELXL-2014/7 (Sheldrick, 2014)'
_computing_molecular_graphics     'ORTEPIII (Johnson, 1996)' 
_computing_publication_material  'XCIF 2014/2 (Bruker AXS, 2014)'
_refine_special_details
;
 Refined as a 2-component twin.
;
_refine_ls_structure_factor_coef  Fsqd
_refine_ls_matrix_type            full
_refine_ls_weighting_scheme       calc
_refine_ls_weighting_details
'w=1/[\s^2^(Fo^2^)+143.8398P] where P=(Fo^2^+2Fc^2^)/3'
_atom_sites_solution_primary      ?
_atom_sites_solution_secondary    ?
_atom_sites_solution_hydrogens    geom
_refine_ls_hydrogen_treatment     constr
_refine_ls_extinction_method      none
_refine_ls_extinction_coef        .
_refine_ls_abs_structure_details
;
No quotients, so Flack parameter determined by classical intensity fit
;
_refine_ls_abs_structure_Flack    0.15(9)
_chemical_absolute_configuration  ?
_refine_ls_number_reflns          2119
_refine_ls_number_parameters      290
_refine_ls_number_restraints      350
_refine_ls_R_factor_all           0.1736
_refine_ls_R_factor_gt            0.1174
_refine_ls_wR_factor_ref          0.2914
_refine_ls_wR_factor_gt           0.2528
_refine_ls_goodness_of_fit_ref    1.116
_refine_ls_restrained_S_all       1.028
_refine_ls_shift/su_max           0.000
_refine_ls_shift/su_mean          0.000
 
loop_
 _atom_site_label
 _atom_site_type_symbol
 _atom_site_fract_x
 _atom_site_fract_y
 _atom_site_fract_z
 _atom_site_U_iso_or_equiv
 _atom_site_adp_type
 _atom_site_occupancy
 _atom_site_site_symmetry_order  
 _atom_site_calc_flag
 _atom_site_refinement_flags_posn
 _atom_site_refinement_flags_adp
 _atom_site_refinement_flags_occupancy
 _atom_site_disorder_assembly
 _atom_site_disorder_group
Fe1 Fe 0.8067(5) 0.6332(8) 0.2028(5) 0.0137(14) Uani 1 1 d . U . . .
Se1 Se 0.6355(3) 0.5738(6) 0.1263(3) 0.0140(11) Uani 1 1 d . U . . .
C4 C 0.832(3) 0.421(6) 0.248(4) 0.016(5) Uani 1 1 d . U . . .
O1 O 0.847(3) 0.286(4) 0.280(3) 0.024(7) Uani 1 1 d . U . . .
N1 N 0.486(3) 0.596(4) 0.255(3) 0.010(5) Uani 1 1 d . U . . .
C3 C 0.753(3) 0.684(5) 0.339(4) 0.010(4) Uani 1 1 d . U . . .
C2 C 0.653(3) 0.671(5) 0.352(4) 0.012(5) Uani 1 1 d . U . . .
H2 H 0.6321 0.6973 0.4206 0.014 Uiso 1 1 calc R U . . .
C1 C 0.581(3) 0.616(5) 0.257(3) 0.009(4) Uani 1 1 d . U . . .
C5 C 0.824(3) 0.741(6) 0.440(4) 0.020(8) Uani 1 1 d . U . . .
H5A H 0.8925 0.7471 0.4228 0.031 Uiso 1 1 calc R U . . .
H5B H 0.8036 0.8567 0.4627 0.031 Uiso 1 1 calc R U . . .
H5C H 0.8211 0.6575 0.4992 0.031 Uiso 1 1 calc R U . . .
C6 C 0.445(3) 0.646(6) 0.359(4) 0.015(8) Uani 1 1 d . U . . .
H6A H 0.3719 0.6256 0.3487 0.023 Uiso 1 1 calc R U . . .
H6B H 0.4775 0.5759 0.4213 0.023 Uiso 1 1 calc R U . . .
H6C H 0.4581 0.7701 0.3754 0.023 Uiso 1 1 calc R U . . .
C7 C 0.413(3) 0.548(6) 0.152(4) 0.014(8) Uani 1 1 d . U . . .
H7A H 0.3444 0.5395 0.1703 0.022 Uiso 1 1 calc R U . . .
H7B H 0.4142 0.6374 0.0956 0.022 Uiso 1 1 calc R U . . .
H7C H 0.4320 0.4352 0.1240 0.022 Uiso 1 1 calc R U . . .
C8 C 0.848(4) 0.709(6) 0.054(4) 0.022(6) Uani 1 1 d . U . . .
H8 H 0.8175 0.6666 -0.0212 0.026 Uiso 1 1 calc R U . . .
C9 C 0.821(4) 0.867(7) 0.107(4) 0.022(6) Uani 1 1 d . U . . .
H9 H 0.7680 0.9537 0.0794 0.026 Uiso 1 1 calc R U . . .
C10 C 0.888(3) 0.868(6) 0.211(4) 0.020(6) Uani 1 1 d . U . . .
H10 H 0.8863 0.9584 0.2692 0.024 Uiso 1 1 calc R U . . .
C11 C 0.951(3) 0.736(6) 0.220(4) 0.021(6) Uani 1 1 d . U . . .
H11 H 1.0058 0.7137 0.2827 0.025 Uiso 1 1 calc R U . . .
C12 C 0.935(4) 0.643(7) 0.118(4) 0.022(6) Uani 1 1 d . U . . .
H12 H 0.9749 0.5402 0.0988 0.027 Uiso 1 1 calc R U . . .
Fe2 Fe 0.2089(5) 0.8953(8) 0.6414(6) 0.0156(15) Uani 1 1 d . U . . .
Se2 Se 0.3723(3) 0.9400(6) 0.6000(4) 0.0175(12) Uani 1 1 d . U . . .
C24 C 0.207(4) 1.110(6) 0.706(4) 0.019(5) Uani 1 1 d . U . . .
O2 O 0.209(2) 1.247(4) 0.731(3) 0.021(6) Uani 1 1 d . U . . .
N2 N 0.541(3) 0.885(5) 0.762(3) 0.018(5) Uani 1 1 d . U . . .
C23 C 0.273(3) 0.814(6) 0.783(4) 0.018(4) Uani 1 1 d . U . . .
C22 C 0.377(3) 0.832(6) 0.810(4) 0.015(5) Uani 1 1 d . U . . .
H22 H 0.4046 0.8055 0.8841 0.018 Uiso 1 1 calc R U . . .
C21 C 0.446(3) 0.887(6) 0.740(4) 0.014(4) Uani 1 1 d . U . . .
C25 C 0.222(4) 0.728(7) 0.861(4) 0.027(9) Uani 1 1 d . U . . .
H25A H 0.1496 0.7237 0.8322 0.040 Uiso 1 1 calc R U . . .
H25B H 0.2480 0.6098 0.8732 0.040 Uiso 1 1 calc R U . . .
H25C H 0.2326 0.7931 0.9304 0.040 Uiso 1 1 calc R U . . .
C26 C 0.603(3) 0.839(6) 0.871(4) 0.015(8) Uani 1 1 d . U . . .
H26A H 0.6743 0.8477 0.8655 0.023 Uiso 1 1 calc R U . . .
H26B H 0.5865 0.9196 0.9275 0.023 Uiso 1 1 calc R U . . .
H26C H 0.5870 0.7195 0.8910 0.023 Uiso 1 1 calc R U . . .
C27 C 0.611(3) 0.927(6) 0.679(4) 0.015(8) Uani 1 1 d . U . . .
H27A H 0.6808 0.9171 0.7150 0.022 Uiso 1 1 calc R U . . .
H27B H 0.5982 0.8459 0.6170 0.022 Uiso 1 1 calc R U . . .
H27C H 0.5978 1.0467 0.6521 0.022 Uiso 1 1 calc R U . . .
C28 C 0.132(4) 0.658(6) 0.610(4) 0.022(6) Uani 1 1 d . U . . .
H28 H 0.1441 0.5488 0.6545 0.027 Uiso 1 1 calc R U . . .
C29 C 0.187(4) 0.714(6) 0.513(4) 0.021(6) Uani 1 1 d . U . . .
H29 H 0.2386 0.6481 0.4789 0.025 Uiso 1 1 calc R U . . .
C30 C 0.140(4) 0.873(7) 0.481(4) 0.022(6) Uani 1 1 d . U . . .
H30 H 0.1582 0.9464 0.4199 0.027 Uiso 1 1 calc R U . . .
C31 C 0.067(3) 0.923(6) 0.545(5) 0.023(6) Uani 1 1 d . U . . .
H31 H 0.0281 1.0342 0.5355 0.028 Uiso 1 1 calc R U . . .
C32 C 0.061(4) 0.804(6) 0.628(5) 0.023(6) Uani 1 1 d . U . . .
H32 H 0.0160 0.8098 0.6852 0.028 Uiso 1 1 calc R U . . .
 
loop_
 _atom_site_aniso_label
 _atom_site_aniso_U_11
 _atom_site_aniso_U_22
 _atom_site_aniso_U_33
 _atom_site_aniso_U_23
 _atom_site_aniso_U_13
 _atom_site_aniso_U_12
Fe1 0.017(3) 0.010(3) 0.015(3) -0.005(3) 0.005(3) 0.002(3)
Se1 0.019(2) 0.0122(19) 0.011(3) -0.0021(19) 0.002(2) -0.0017(19)
C4 0.016(5) 0.016(5) 0.017(5) -0.001(3) 0.002(3) 0.000(3)
O1 0.024(8) 0.023(8) 0.024(8) -0.003(6) 0.002(6) 0.006(6)
N1 0.011(7) 0.005(7) 0.012(7) 0.001(6) -0.002(6) 0.002(6)
C3 0.012(7) 0.006(7) 0.012(7) -0.006(6) 0.004(6) 0.002(6)
C2 0.014(7) 0.008(7) 0.014(7) -0.001(6) 0.003(6) 0.001(6)
C1 0.013(6) 0.005(6) 0.011(6) 0.002(5) 0.002(5) 0.003(5)
C5 0.020(10) 0.020(9) 0.021(10) -0.002(6) 0.002(6) 0.003(6)
C6 0.015(9) 0.016(9) 0.014(9) 0.002(6) 0.001(6) 0.002(6)
C7 0.013(9) 0.014(9) 0.015(9) 0.000(6) 0.000(6) -0.001(6)
C8 0.023(8) 0.023(8) 0.020(8) 0.003(7) 0.006(7) 0.000(7)
C9 0.022(8) 0.023(8) 0.022(8) 0.004(7) 0.008(7) -0.001(7)
C10 0.021(8) 0.020(8) 0.020(8) -0.001(7) 0.007(7) 0.000(7)
C11 0.020(8) 0.021(8) 0.021(8) 0.002(7) 0.003(7) 0.001(7)
C12 0.022(8) 0.023(8) 0.023(8) 0.001(7) 0.006(7) 0.002(7)
Fe2 0.016(3) 0.008(3) 0.023(4) 0.001(3) 0.001(3) -0.001(3)
Se2 0.020(2) 0.014(2) 0.018(3) 0.002(2) 0.002(2) 0.0022(19)
C24 0.018(7) 0.012(7) 0.025(8) 0.003(7) 0.000(7) -0.003(7)
O2 0.021(11) 0.015(10) 0.025(12) -0.005(11) -0.006(11) -0.008(10)
N2 0.015(7) 0.018(8) 0.019(8) 0.002(7) 0.000(7) 0.001(7)
C23 0.017(7) 0.015(7) 0.021(7) 0.000(6) 0.003(6) 0.001(6)
C22 0.015(7) 0.015(7) 0.016(7) 0.001(6) 0.004(6) 0.003(6)
C21 0.015(6) 0.014(6) 0.015(6) 0.001(6) 0.006(5) 0.002(6)
C25 0.026(14) 0.028(14) 0.026(14) -0.007(13) 0.003(13) 0.008(13)
C26 0.010(13) 0.018(13) 0.019(14) 0.000(12) 0.005(11) 0.006(11)
C27 0.015(9) 0.017(9) 0.014(9) -0.002(6) 0.008(6) -0.002(6)
C28 0.022(8) 0.022(8) 0.023(8) 0.001(7) 0.001(7) -0.002(7)
C29 0.020(8) 0.023(8) 0.020(8) 0.000(7) 0.003(7) 0.001(7)
C30 0.024(8) 0.022(8) 0.021(8) -0.001(7) 0.003(7) 0.001(7)
C31 0.022(8) 0.024(8) 0.023(8) -0.002(7) 0.005(7) 0.003(7)
C32 0.020(8) 0.024(8) 0.024(8) -0.002(7) 0.003(7) 0.001(7)
 
_geom_special_details
;
 All esds (except the esd in the dihedral angle between two l.s. planes)
 are estimated using the full covariance matrix.  The cell esds are taken
 into account individually in the estimation of esds in distances, angles
 and torsion angles; correlations between esds in cell parameters are only
 used when they are defined by crystal symmetry.  An approximate (isotropic)
 treatment of cell esds is used for estimating esds involving l.s. planes.
;
 
loop_
 _geom_bond_atom_site_label_1
 _geom_bond_atom_site_label_2
 _geom_bond_distance
 _geom_bond_site_symmetry_2
 _geom_bond_publ_flag
Fe1 C4 1.74(4) . ?
Fe1 C3 1.96(4) . ?
Fe1 C11 2.07(5) . ?
Fe1 C8 2.08(5) . ?
Fe1 C10 2.10(5) . ?
Fe1 C12 2.16(5) . ?
Fe1 C9 2.17(5) . ?
Fe1 Se1 2.391(8) . ?
Se1 C1 1.90(4) . ?
C4 O1 1.12(6) . ?
N1 C1 1.28(6) . ?
N1 C7 1.52(5) . ?
N1 C6 1.53(6) . ?
C3 C2 1.39(6) . ?
C3 C5 1.50(6) . ?
C2 C1 1.46(6) . ?
C2 H2 0.9500 . ?
C5 H5A 0.9800 . ?
C5 H5B 0.9800 . ?
C5 H5C 0.9800 . ?
C6 H6A 0.9800 . ?
C6 H6B 0.9800 . ?
C6 H6C 0.9800 . ?
C7 H7A 0.9800 . ?
C7 H7B 0.9800 . ?
C7 H7C 0.9800 . ?
C8 C12 1.39(7) . ?
C8 C9 1.46(7) . ?
C8 H8 1.0000 . ?
C9 C10 1.43(7) . ?
C9 H9 1.0000 . ?
C10 C11 1.32(6) . ?
C10 H10 1.0000 . ?
C11 C12 1.43(7) . ?
C11 H11 1.0000 . ?
C12 H12 1.0000 . ?
Fe2 C24 1.83(4) . ?
Fe2 C23 1.92(5) . ?
Fe2 C30 2.05(5) . ?
Fe2 C29 2.09(5) . ?
Fe2 C32 2.09(5) . ?
Fe2 C31 2.09(5) . ?
Fe2 C28 2.10(5) . ?
Fe2 Se2 2.357(9) . ?
Se2 C21 1.88(5) . ?
C24 O2 1.09(5) . ?
N2 C21 1.27(6) . ?
N2 C26 1.50(6) . ?
N2 C27 1.52(6) . ?
C23 C22 1.39(6) . ?
C23 C25 1.43(7) . ?
C22 C21 1.43(6) . ?
C22 H22 0.9500 . ?
C25 H25A 0.9800 . ?
C25 H25B 0.9800 . ?
C25 H25C 0.9800 . ?
C26 H26A 0.9800 . ?
C26 H26B 0.9800 . ?
C26 H26C 0.9800 . ?
C27 H27A 0.9800 . ?
C27 H27B 0.9800 . ?
C27 H27C 0.9800 . ?
C28 C32 1.51(7) . ?
C28 C29 1.56(7) . ?
C28 H28 1.0000 . ?
C29 C30 1.41(7) . ?
C29 H29 1.0000 . ?
C30 C31 1.40(7) . ?
C30 H30 1.0000 . ?
C31 C32 1.38(7) . ?
C31 H31 1.0000 . ?
C32 H32 1.0000 . ?
 
loop_
 _geom_angle_atom_site_label_1
 _geom_angle_atom_site_label_2
 _geom_angle_atom_site_label_3
 _geom_angle
 _geom_angle_site_symmetry_1
 _geom_angle_site_symmetry_3
 _geom_angle_publ_flag
C4 Fe1 C3 90(2) . . ?
C4 Fe1 C11 101.2(19) . . ?
C3 Fe1 C11 107.6(19) . . ?
C4 Fe1 C8 119(2) . . ?
C3 Fe1 C8 151.7(18) . . ?
C11 Fe1 C8 67(2) . . ?
C4 Fe1 C10 136(2) . . ?
C3 Fe1 C10 92.6(19) . . ?
C11 Fe1 C10 36.8(18) . . ?
C8 Fe1 C10 66.0(19) . . ?
C4 Fe1 C12 93(2) . . ?
C3 Fe1 C12 146.8(19) . . ?
C11 Fe1 C12 39.5(19) . . ?
C8 Fe1 C12 38.4(19) . . ?
C10 Fe1 C12 63(2) . . ?
C4 Fe1 C9 157(2) . . ?
C3 Fe1 C9 111.8(18) . . ?
C11 Fe1 C9 65.0(19) . . ?
C8 Fe1 C9 40.0(18) . . ?
C10 Fe1 C9 39.2(18) . . ?
C12 Fe1 C9 64.0(19) . . ?
C4 Fe1 Se1 94.1(15) . . ?
C3 Fe1 Se1 84.9(13) . . ?
C11 Fe1 Se1 160.1(14) . . ?
C8 Fe1 Se1 94.8(14) . . ?
C10 Fe1 Se1 130.0(13) . . ?
C12 Fe1 Se1 127.7(15) . . ?
C9 Fe1 Se1 96.3(13) . . ?
C1 Se1 Fe1 96.5(13) . . ?
O1 C4 Fe1 178(4) . . ?
C1 N1 C7 124(4) . . ?
C1 N1 C6 117(3) . . ?
C7 N1 C6 119(3) . . ?
C2 C3 C5 115(4) . . ?
C2 C3 Fe1 126(3) . . ?
C5 C3 Fe1 119(3) . . ?
C3 C2 C1 118(4) . . ?
C3 C2 H2 121.2 . . ?
C1 C2 H2 121.2 . . ?
N1 C1 C2 126(4) . . ?
N1 C1 Se1 119(3) . . ?
C2 C1 Se1 115(3) . . ?
C3 C5 H5A 109.5 . . ?
C3 C5 H5B 109.5 . . ?
H5A C5 H5B 109.5 . . ?
C3 C5 H5C 109.5 . . ?
H5A C5 H5C 109.5 . . ?
H5B C5 H5C 109.5 . . ?
N1 C6 H6A 109.5 . . ?
N1 C6 H6B 109.5 . . ?
H6A C6 H6B 109.5 . . ?
N1 C6 H6C 109.5 . . ?
H6A C6 H6C 109.5 . . ?
H6B C6 H6C 109.5 . . ?
N1 C7 H7A 109.5 . . ?
N1 C7 H7B 109.5 . . ?
H7A C7 H7B 109.5 . . ?
N1 C7 H7C 109.5 . . ?
H7A C7 H7C 109.5 . . ?
H7B C7 H7C 109.5 . . ?
C12 C8 C9 107(4) . . ?
C12 C8 Fe1 74(3) . . ?
C9 C8 Fe1 73(3) . . ?
C12 C8 H8 126.1 . . ?
C9 C8 H8 126.1 . . ?
Fe1 C8 H8 126.1 . . ?
C10 C9 C8 104(4) . . ?
C10 C9 Fe1 68(3) . . ?
C8 C9 Fe1 67(3) . . ?
C10 C9 H9 128.0 . . ?
C8 C9 H9 128.0 . . ?
Fe1 C9 H9 128.0 . . ?
C11 C10 C9 112(5) . . ?
C11 C10 Fe1 70(3) . . ?
C9 C10 Fe1 73(3) . . ?
C11 C10 H10 124.1 . . ?
C9 C10 H10 124.1 . . ?
Fe1 C10 H10 124.1 . . ?
C10 C11 C12 108(4) . . ?
C10 C11 Fe1 73(3) . . ?
C12 C11 Fe1 74(3) . . ?
C10 C11 H11 125.7 . . ?
C12 C11 H11 125.7 . . ?
Fe1 C11 H11 125.7 . . ?
C8 C12 C11 108(4) . . ?
C8 C12 Fe1 68(3) . . ?
C11 C12 Fe1 67(3) . . ?
C8 C12 H12 125.9 . . ?
C11 C12 H12 125.9 . . ?
Fe1 C12 H12 125.9 . . ?
C24 Fe2 C23 86(2) . . ?
C24 Fe2 C30 117(2) . . ?
C23 Fe2 C30 156(2) . . ?
C24 Fe2 C29 156.6(19) . . ?
C23 Fe2 C29 117.0(19) . . ?
C30 Fe2 C29 39.8(19) . . ?
C24 Fe2 C32 105(2) . . ?
C23 Fe2 C32 105(2) . . ?
C30 Fe2 C32 67(2) . . ?
C29 Fe2 C32 72(2) . . ?
C24 Fe2 C31 95(2) . . ?
C23 Fe2 C31 142(2) . . ?
C30 Fe2 C31 39.6(19) . . ?
C29 Fe2 C31 68.5(19) . . ?
C32 Fe2 C31 38(2) . . ?
C24 Fe2 C28 145(2) . . ?
C23 Fe2 C28 91(2) . . ?
C30 Fe2 C28 67(2) . . ?
C29 Fe2 C28 43.6(19) . . ?
C32 Fe2 C28 42(2) . . ?
C31 Fe2 C28 67(2) . . ?
C24 Fe2 Se2 92.1(15) . . ?
C23 Fe2 Se2 86.6(14) . . ?
C30 Fe2 Se2 95.8(14) . . ?
C29 Fe2 Se2 87.7(14) . . ?
C32 Fe2 Se2 159.9(15) . . ?
C31 Fe2 Se2 131.5(15) . . ?
C28 Fe2 Se2 122.4(15) . . ?
C21 Se2 Fe2 98.3(14) . . ?
O2 C24 Fe2 171(4) . . ?
C21 N2 C26 126(4) . . ?
C21 N2 C27 124(4) . . ?
C26 N2 C27 110(3) . . ?
C22 C23 C25 117(4) . . ?
C22 C23 Fe2 119(4) . . ?
C25 C23 Fe2 124(3) . . ?
C23 C22 C21 127(4) . . ?
C23 C22 H22 116.4 . . ?
C21 C22 H22 116.4 . . ?
N2 C21 C22 127(4) . . ?
N2 C21 Se2 124(3) . . ?
C22 C21 Se2 108(3) . . ?
C23 C25 H25A 109.5 . . ?
C23 C25 H25B 109.5 . . ?
H25A C25 H25B 109.5 . . ?
C23 C25 H25C 109.5 . . ?
H25A C25 H25C 109.5 . . ?
H25B C25 H25C 109.5 . . ?
N2 C26 H26A 109.5 . . ?
N2 C26 H26B 109.5 . . ?
H26A C26 H26B 109.5 . . ?
N2 C26 H26C 109.5 . . ?
H26A C26 H26C 109.5 . . ?
H26B C26 H26C 109.5 . . ?
N2 C27 H27A 109.5 . . ?
N2 C27 H27B 109.5 . . ?
H27A C27 H27B 109.5 . . ?
N2 C27 H27C 109.5 . . ?
H27A C27 H27C 109.5 . . ?
H27B C27 H27C 109.5 . . ?
C32 C28 C29 107(4) . . ?
C32 C28 Fe2 69(3) . . ?
C29 C28 Fe2 68(3) . . ?
C32 C28 H28 126.3 . . ?
C29 C28 H28 126.3 . . ?
Fe2 C28 H28 126.3 . . ?
C30 C29 C28 102(4) . . ?
C30 C29 Fe2 69(3) . . ?
C28 C29 Fe2 69(3) . . ?
C30 C29 H29 129.0 . . ?
C28 C29 H29 129.0 . . ?
Fe2 C29 H29 129.0 . . ?
C31 C30 C29 114(5) . . ?
C31 C30 Fe2 72(3) . . ?
C29 C30 Fe2 72(3) . . ?
C31 C30 H30 123.1 . . ?
C29 C30 H30 123.1 . . ?
Fe2 C30 H30 123.1 . . ?
C32 C31 C30 111(4) . . ?
C32 C31 Fe2 71(3) . . ?
C30 C31 Fe2 68(3) . . ?
C32 C31 H31 124.3 . . ?
C30 C31 H31 124.3 . . ?
Fe2 C31 H31 124.3 . . ?
C31 C32 C28 106(4) . . ?
C31 C32 Fe2 71(3) . . ?
C28 C32 Fe2 69(3) . . ?
C31 C32 H32 127.1 . . ?
C28 C32 H32 127.1 . . ?
Fe2 C32 H32 127.1 . . ?
 
_refine_diff_density_max    1.629
_refine_diff_density_min   -1.862
_refine_diff_density_rms    0.402

_shelx_res_file
;

    twin4_a.res created by SHELXL-2014/7


TITL twin4_a.res in Pc
CELL  0.71073  13.4536   7.6745  12.2846   90.000   99.072   90.000
ZERR    4.000   0.0030   0.0020   0.0020    0.030    0.030    0.030
LATT -1
SYMM X, -Y, 1/2+Z
SFAC C  H  Fe Se O  N
UNIT 48  60  4  4  4  4
OMIT -3 50
L.S. 10
BOND $H
FMAP 2
PLAN 20
acta

size 0.21 0.19 0.15
temp -173
simu .01 fe1 > c32
isor .01 $c $o $n
isor .003 c4 c5 c6 c7 c27 o1
WGHT    0.000000  143.839798
BASF   0.27600
FVAR       0.44483
FE1   3    0.806737    0.633228    0.202798    11.00000    0.01658    0.01035 =
         0.01526   -0.00469    0.00545    0.00156
SE1   4    0.635463    0.573772    0.126294    11.00000    0.01937    0.01218 =
         0.01052   -0.00212    0.00236   -0.00168
C4    1    0.831559    0.421068    0.248338    11.00000    0.01612    0.01586 =
         0.01678   -0.00073    0.00231   -0.00041
O1    5    0.846976    0.285649    0.279952    11.00000    0.02386    0.02267 =
         0.02398   -0.00313    0.00194    0.00555
N1    6    0.485885    0.596127    0.255002    11.00000    0.01086    0.00528 =
         0.01224    0.00119   -0.00165    0.00224
C3    1    0.753046    0.684496    0.338574    11.00000    0.01247    0.00636 =
         0.01233   -0.00606    0.00414    0.00164
C2    1    0.652937    0.671413    0.351956    11.00000    0.01408    0.00758 =
         0.01379   -0.00053    0.00297    0.00056
AFIX  43
H2    2    0.632116    0.697323    0.420551    11.00000   -1.20000
AFIX   0
C1    1    0.580636    0.616383    0.256851    11.00000    0.01265    0.00488 =
         0.01083    0.00152    0.00194    0.00342
C5    1    0.823721    0.741408    0.439625    11.00000    0.01970    0.01961 =
         0.02135   -0.00245    0.00191    0.00254
AFIX  33
H5A   2    0.892463    0.747087    0.422778    11.00000   -1.50000
H5B   2    0.803630    0.856708    0.462678    11.00000   -1.50000
H5C   2    0.821105    0.657498    0.499241    11.00000   -1.50000
AFIX   0
C6    1    0.444667    0.646418    0.359458    11.00000    0.01547    0.01601 =
         0.01359    0.00186    0.00112    0.00208
AFIX  33
H6A   2    0.371905    0.625626    0.348712    11.00000   -1.50000
H6B   2    0.477522    0.575869    0.421336    11.00000   -1.50000
H6C   2    0.458095    0.770064    0.375426    11.00000   -1.50000
AFIX   0
C7    1    0.412604    0.547758    0.152053    11.00000    0.01340    0.01350 =
         0.01543   -0.00003    0.00012   -0.00092
AFIX  33
H7A   2    0.344412    0.539472    0.170254    11.00000   -1.50000
H7B   2    0.414228    0.637425    0.095562    11.00000   -1.50000
H7C   2    0.431982    0.435230    0.124049    11.00000   -1.50000
AFIX   0
C8    1    0.848321    0.708628    0.053646    11.00000    0.02285    0.02317 =
         0.02040    0.00315    0.00604    0.00009
AFIX  13
H8    2    0.817522    0.666588   -0.021151    11.00000   -1.20000
AFIX   0
C9    1    0.821376    0.867018    0.107445    11.00000    0.02238    0.02296 =
         0.02153    0.00414    0.00760   -0.00098
AFIX  13
H9    2    0.767980    0.953749    0.079358    11.00000   -1.20000
AFIX   0
C10   1    0.887696    0.868026    0.210781    11.00000    0.02141    0.02042 =
         0.01967   -0.00072    0.00675   -0.00045
AFIX  13
H10   2    0.886328    0.958371    0.269185    11.00000   -1.20000
AFIX   0
C11   1    0.950532    0.735536    0.219688    11.00000    0.02043    0.02125 =
         0.02052    0.00237    0.00314    0.00065
AFIX  13
H11   2    1.005830    0.713650    0.282745    11.00000   -1.20000
AFIX   0
C12   1    0.935007    0.642675    0.117669    11.00000    0.02210    0.02251 =
         0.02260    0.00070    0.00620    0.00244
AFIX  13
H12   2    0.974925    0.540201    0.098786    11.00000   -1.20000
AFIX   0
FE2   3    0.208928    0.895327    0.641361    11.00000    0.01556    0.00799 =
         0.02266    0.00138    0.00112   -0.00108
SE2   4    0.372259    0.940004    0.599979    11.00000    0.02023    0.01388 =
         0.01798    0.00157    0.00191    0.00225
C24   1    0.207428    1.110304    0.705829    11.00000    0.01777    0.01247 =
         0.02471    0.00280   -0.00021   -0.00321
O2    5    0.208699    1.246741    0.731391    11.00000    0.02141    0.01460 =
         0.02492   -0.00513   -0.00556   -0.00794
N2    6    0.540904    0.884544    0.761672    11.00000    0.01514    0.01831 =
         0.01918    0.00233   -0.00023    0.00088
C23   1    0.273105    0.814258    0.782533    11.00000    0.01676    0.01533 =
         0.02063    0.00033    0.00270    0.00148
C22   1    0.376560    0.832246    0.810119    11.00000    0.01530    0.01460 =
         0.01559    0.00051    0.00422    0.00298
AFIX  43
H22   2    0.404619    0.805541    0.884111    11.00000   -1.20000
AFIX   0
C21   1    0.445700    0.886526    0.739570    11.00000    0.01484    0.01363 =
         0.01541    0.00073    0.00615    0.00243
C25   1    0.221814    0.728473    0.860742    11.00000    0.02650    0.02816 =
         0.02567   -0.00734    0.00349    0.00825
AFIX  33
H25A  2    0.149612    0.723681    0.832210    11.00000   -1.50000
H25B  2    0.248047    0.609809    0.873240    11.00000   -1.50000
H25C  2    0.232605    0.793094    0.930414    11.00000   -1.50000
AFIX   0
C26   1    0.602534    0.838861    0.870923    11.00000    0.00999    0.01757 =
         0.01922   -0.00014    0.00482    0.00573
AFIX  33
H26A  2    0.674254    0.847697    0.865487    11.00000   -1.50000
H26B  2    0.586525    0.919634    0.927471    11.00000   -1.50000
H26C  2    0.586992    0.719477    0.891020    11.00000   -1.50000
AFIX   0
C27   1    0.610625    0.927405    0.679077    11.00000    0.01505    0.01733 =
         0.01428   -0.00239    0.00836   -0.00162
AFIX  33
H27A  2    0.680778    0.917135    0.715002    11.00000   -1.50000
H27B  2    0.598186    0.845940    0.616988    11.00000   -1.50000
H27C  2    0.597793    1.046729    0.652074    11.00000   -1.50000
AFIX   0
C28   1    0.132031    0.657876    0.609869    11.00000    0.02158    0.02239 =
         0.02257    0.00101    0.00098   -0.00231
AFIX  13
H28   2    0.144092    0.548786    0.654515    11.00000   -1.20000
AFIX   0
C29   1    0.187209    0.713506    0.513286    11.00000    0.02032    0.02290 =
         0.01979   -0.00007    0.00296    0.00088
AFIX  13
H29   2    0.238582    0.648140    0.478889    11.00000   -1.20000
AFIX   0
C30   1    0.139824    0.873082    0.480998    11.00000    0.02350    0.02172 =
         0.02149   -0.00088    0.00311    0.00073
AFIX  13
H30   2    0.158245    0.946434    0.419917    11.00000   -1.20000
AFIX   0
C31   1    0.066794    0.922541    0.544986    11.00000    0.02247    0.02374 =
         0.02343   -0.00233    0.00502    0.00266
AFIX  13
H31   2    0.028080    1.034194    0.535463    11.00000   -1.20000
AFIX   0
C32   1    0.060977    0.803954    0.627805    11.00000    0.02035    0.02394 =
         0.02429   -0.00205    0.00266    0.00108
AFIX  13
H32   2    0.015994    0.809788    0.685203    11.00000   -1.20000
AFIX   0
HKLF 5 1 0 0 1 0 -1 0 1 0 0

REM  twin4_a.res in Pc
REM R1 =  0.1174 for    1870 Fo > 4sig(Fo)  and  0.1736 for all    2119 data
REM    290 parameters refined using    350 restraints

END

WGHT      0.0000    143.6832

REM Highest difference peak  1.629,  deepest hole -1.862,  1-sigma level  0.402
Q1    1   0.4155  1.0307  0.6188  11.00000  0.05    1.63
Q2    1   0.6440  0.6499  0.4187  11.00000  0.05    1.61
Q3    1   0.3778  0.9009  0.3241  11.00000  0.05    1.52
Q4    1   0.6329  0.4408  0.1265  11.00000  0.05    1.49
Q5    1  -0.0590  0.7738  0.7451  11.00000  0.05    1.46
Q6    1   0.2615  0.9666  0.6504  11.00000  0.05    1.44
Q7    1   1.0601  0.6010  0.2015  11.00000  0.05    1.40
Q8    1   0.6261  0.6654  0.2776  11.00000  0.05    1.39
Q9    1   0.5179  1.0423  0.6005  11.00000  0.05    1.39
Q10   1   0.6190  0.6915  0.8257  11.00000  0.05    1.39
Q11   1   0.6238  0.5650  0.1959  11.00000  0.05    1.38
Q12   1   0.1628  0.9702  0.6147  11.00000  0.05    1.38
Q13   1   0.5048  0.9699  0.9354  11.00000  0.05    1.38
Q14   1   0.6213  0.4688  0.2593  11.00000  0.05    1.37
Q15   1   0.7538  0.5984 -0.1050  11.00000  0.05    1.37
Q16   1   0.6401  0.8804  0.7011  11.00000  0.05    1.34
Q17   1   0.6409  0.6202  0.0469  11.00000  0.05    1.34
Q18   1   0.6199  0.4756  0.3414  11.00000  0.05    1.32
Q19   1   0.8553  0.3546  0.3777  11.00000  0.05    1.31
Q20   1   0.4929  0.9995  0.5683  11.00000  0.05    1.29
;
_shelx_res_checksum   39453

_shelx_hkl_file
;
   1   0   0 53.3065 4.51650  -2
   1   0   0 53.3065 4.51650   1
  -2   0   1 6188.83 389.417  -2
   2   0   0 6188.83 389.417   1
  -3   0   1 -2.1570 1.68772  -2
   3   0   0 -2.1570 1.68772   1
  -4   0   1 2190.91 197.229  -2
   4   0   0 2190.91 197.229   1
  -5   0   2 -35.578 12.2751  -2
   5   0   0 -35.578 12.2751   1
  -6   0   2 1121.85 61.8648  -2
   6   0   0 1121.85 61.8648   1
  -7   0   2 30.9195 6.59513  -2
   7   0   0 30.9195 6.59513   1
  -8   0   3 1413.60 62.9940  -2
   8   0   0 1413.60 62.9940   1
  -9   0   3 -85.130 36.4063  -2
   9   0   0 -85.130 36.4063   1
 -10   0   3 497.115 70.8048  -2
  10   0   0 497.115 70.8048   1
 -11   0   4 -143.43 379.887  -2
  11   0   0 -143.43 379.887   1
 -12   0   4 434.597 40.1037  -2
  12   0   0 434.597 40.1037   1
 -14   0   5 192.483 100.122  -2
  14   0   0 192.483 100.122   1
   0   1   0 48.4207 2.08847  -2
   0   1   0 48.4207 2.08847   1
   1   1   0 224.092 15.2024  -2
   1   1   0 224.092 15.2024   1
  -2   1   1 1250.39 79.2020  -2
   2   1   0 1250.39 79.2020   1
  -3   1   1 1010.53 28.2863  -2
   3   1   0 1010.53 28.2863   1
  -4   1   1 277.090 15.7625  -2
   4   1   0 277.090 15.7625   1
  -5   1   2 521.806 20.3029  -2
   5   1   0 521.806 20.3029   1
  -6   1   2 432.171 15.1494  -2
   6   1   0 432.171 15.1494   1
  -7   1   2 574.631 29.6553  -2
   7   1   0 574.631 29.6553   1
  -8   1   3 588.610 32.9843  -2
   8   1   0 588.610 32.9843   1
  -9   1   3 335.716 15.7553  -2
   9   1   0 335.716 15.7553   1
 -10   1   3 369.296 31.8821  -2
  10   1   0 369.296 31.8821   1
 -11   1   4 109.802 13.6541  -2
  11   1   0 109.802 13.6541   1
 -12   1   4 203.858 17.8051  -2
  12   1   0 203.858 17.8051   1
 -13   1   4 342.587 88.4958  -2
  13   1   0 342.587 88.4958   1
 -14   1   5 307.282 70.6158  -2
  14   1   0 307.282 70.6158   1
 -15   1   5 210.687 99.4133  -2
  15   1   0 210.687 99.4133   1
   0   2   0 25.2509 2.13227  -2
   0   2   0 25.2509 2.13227   1
   1   2   0 9999.99 456.205  -2
   1   2   0 9999.99 456.205   1
  -2   2   1 2897.38 165.649  -2
   2   2   0 2897.38 165.649   1
  -3   2   1 1208.62 36.2315  -2
   3   2   0 1208.62 36.2315   1
  -4   2   1 877.484 37.4136  -2
   4   2   0 877.484 37.4136   1
  -5   2   2 1044.12 37.7327  -2
   5   2   0 1044.12 37.7327   1
  -6   2   2 507.677 17.9655  -2
   6   2   0 507.677 17.9655   1
  -7   2   2 706.640 27.7014  -2
   7   2   0 706.640 27.7014   1
  -8   2   3 445.338 294.045  -2
   8   2   0 445.338 294.045   1
  -9   2   3 283.349 13.7863  -2
   9   2   0 283.349 13.7863   1
 -10   2   3 83.0369 13.7919  -2
  10   2   0 83.0369 13.7919   1
 -11   2   4 362.262 19.0674  -2
  11   2   0 362.262 19.0674   1
 -12   2   4 -82.043 16.6826  -2
  12   2   0 -82.043 16.6826   1
 -14   2   5 144.716 50.6398  -2
  14   2   0 144.716 50.6398   1
   0   3   0 311.263 15.0017  -2
   0   3   0 311.263 15.0017   1
   1   3   0 140.655 14.9534  -2
   1   3   0 140.655 14.9534   1
  -2   3   1 195.690 17.6763  -2
   2   3   0 195.690 17.6763   1
  -3   3   1 565.592 19.3300  -2
   3   3   0 565.592 19.3300   1
  -4   3   1 57.0336 121.777  -2
   4   3   0 57.0336 121.777   1
  -5   3   2 427.671 17.6788  -2
   5   3   0 427.671 17.6788   1
  -6   3   2 286.142 11.8905  -2
   6   3   0 286.142 11.8905   1
  -7   3   2 -65.327 280.625  -2
   7   3   0 -65.327 280.625   1
  -8   3   3 267.606 17.3583  -2
   8   3   0 267.606 17.3583   1
  -9   3   3 411.200 19.4181  -2
   9   3   0 411.200 19.4181   1
 -10   3   3 123.298 45.8422  -2
  10   3   0 123.298 45.8422   1
 -11   3   4 422.984 47.8757  -2
  11   3   0 422.984 47.8757   1
 -12   3   4 204.300 16.3570  -2
  12   3   0 204.300 16.3570   1
 -13   3   4 264.190 37.4939  -2
  13   3   0 264.190 37.4939   1
 -14   3   5 6.39200 57.6976  -2
  14   3   0 6.39200 57.6976   1
   0   4   0 2541.80 103.975  -2
   0   4   0 2541.80 103.975   1
   1   4   0 2451.64 114.727  -2
   1   4   0 2451.64 114.727   1
  -2   4   1 957.199 48.4825  -2
   2   4   0 957.199 48.4825   1
  -3   4   1 1892.07 80.1114  -2
   3   4   0 1892.07 80.1114   1
  -4   4   1 203.617 16.4987  -2
   4   4   0 203.617 16.4987   1
  -5   4   2 687.893 40.2949  -2
   5   4   0 687.893 40.2949   1
  -6   4   2 186.511 14.8568  -2
   6   4   0 186.511 14.8568   1
  -7   4   2 879.248 52.7673  -2
   7   4   0 879.248 52.7673   1
  -8   4   3 220.178 20.1693  -2
   8   4   0 220.178 20.1693   1
  -9   4   3 317.335 13.5184  -2
   9   4   0 317.335 13.5184   1
 -10   4   3 -44.727 25.5067  -2
  10   4   0 -44.727 25.5067   1
 -11   4   4 231.631 21.7882  -2
  11   4   0 231.631 21.7882   1
 -12   4   4 82.7548 13.0325  -2
  12   4   0 82.7548 13.0325   1
   0   5   0 129.177 9.33994  -2
   0   5   0 129.177 9.33994   1
   1   5   0 120.055 10.9487  -2
   1   5   0 120.055 10.9487   1
  -2   5   1 339.345 23.0539  -2
   2   5   0 339.345 23.0539   1
  -3   5   1 186.229 10.6475  -2
   3   5   0 186.229 10.6475   1
  -4   5   1 250.075 13.9025  -2
   4   5   0 250.075 13.9025   1
  -5   5   2 193.511 13.1797  -2
   5   5   0 193.511 13.1797   1
  -6   5   2 59.3916 5.92538  -2
   6   5   0 59.3916 5.92538   1
  -7   5   2 684.141 57.2758  -2
   7   5   0 684.141 57.2758   1
  -9   5   3 220.754 19.5686  -2
   9   5   0 220.754 19.5686   1
 -10   5   3 277.557 69.2249  -2
  10   5   0 277.557 69.2249   1
 -11   5   4 382.019 31.1739  -2
  11   5   0 382.019 31.1739   1
 -12   5   4 71.4688 16.3695  -2
  12   5   0 71.4688 16.3695   1
   0   6   0 953.639 58.8693  -2
   0   6   0 953.639 58.8693   1
   1   6   0 135.952 13.8808  -2
   1   6   0 135.952 13.8808   1
  -2   6   1 829.710 38.0596  -2
   2   6   0 829.710 38.0596   1
  -3   6   1 322.540 17.9900  -2
   3   6   0 322.540 17.9900   1
  -4   6   1 181.939 17.5417  -2
   4   6   0 181.939 17.5417   1
  -5   6   2 308.900 23.1994  -2
   5   6   0 308.900 23.1994   1
  -6   6   2 425.691 21.3819  -2
   6   6   0 425.691 21.3819   1
  -7   6   2 118.144 16.5047  -2
   7   6   0 118.144 16.5047   1
  -8   6   3 257.628 38.9338  -2
   8   6   0 257.628 38.9338   1
  -9   6   3 107.379 19.9484  -2
   9   6   0 107.379 19.9484   1
   0   7   0 -19.424 9.22010  -2
   0   7   0 -19.424 9.22010   1
   1   7   0 63.2906 13.9795  -2
   1   7   0 63.2906 13.9795   1
  -2   7   1 79.2639 14.1067  -2
   2   7   0 79.2639 14.1067   1
  -3   7   1 85.8607 10.0364  -2
   3   7   0 85.8607 10.0364   1
  -4   7   1 44.1237 15.9610  -2
   4   7   0 44.1237 15.9610   1
  -5   7   2 176.298 18.3019  -2
   5   7   0 176.298 18.3019   1
  -6   7   2 208.101 15.2390  -2
   6   7   0 208.101 15.2390   1
  -7   7   2 96.0521 26.4066  -2
   7   7   0 96.0521 26.4066   1
  -8   7   3 302.456 32.3450  -2
   8   7   0 302.456 32.3450   1
  -9   7   3 177.782 19.6425  -2
   9   7   0 177.782 19.6425   1
   0   8   0 68.9935 13.4812  -2
   0   8   0 68.9935 13.4812   1
   1   8   0 73.9611 16.2745  -2
   1   8   0 73.9611 16.2745   1
  -2   8   1 238.014 20.4673  -2
   2   8   0 238.014 20.4673   1
  -3   8   1 150.933 13.7937  -2
   3   8   0 150.933 13.7937   1
  -4   8   1 589.856 31.8733  -2
   4   8   0 589.856 31.8733   1
  -5   8   2 142.283 20.7534  -2
   5   8   0 142.283 20.7534   1
  -6   8   2 283.791 18.7755  -2
   6   8   0 283.791 18.7755   1
   0   9   0 65.1329 53.2570  -2
   0   9   0 65.1329 53.2570   1
   1   9   0 19.8262 21.6172  -2
   1   9   0 19.8262 21.6172   1
  -2   9   1 5.33196 21.7026  -2
   2   9   0 5.33196 21.7026   1
  -3   9   1 30.4312 11.9043  -2
   3   9   0 30.4312 11.9043   1
  -4   9   1 93.2145 32.3890  -2
   4   9   0 93.2145 32.3890   1
  -5   9   2 76.9205 28.6244  -2
   5   9   0 76.9205 28.6244   1
 -14   0   4 656.167 101.634  -2
 -14   0   1 656.167 101.634   1
 -12   0   3 514.170 53.9825  -2
 -12   0   1 514.170 53.9825   1
 -11   0   3 -388.43 746.247  -2
 -11   0   1 -388.43 746.247   1
  -9   0   2 172.295 126.768  -2
  -9   0   1 172.295 126.768   1
  -8   0   2 870.508 70.0864  -2
  -8   0   1 870.508 70.0864   1
  -7   0   1 -269.71 320.155  -2
  -7   0   1 -269.71 320.155   1
  -6   0   1 558.183 24.6547  -2
  -6   0   1 558.183 24.6547   1
  -5   0   1 -7.8742 6.99466  -2
  -5   0   1 -7.8742 6.99466   1
   4   0   0 2619.08 234.947  -2
  -4   0   1 2619.08 234.947   1
   3   0   0 92.2345 45.9203  -2
  -3   0   1 92.2345 45.9203   1
   2   0   0 2468.72 220.264  -2
  -2   0   1 2468.72 220.264   1
  -1   0   1 3.91923 0.31995   1
   0   0   1 536.219 21.5828  -2
   0   0   1 536.219 21.5828   1
  -1   0   1 9.74154 3.77497  -2
   1   0   1 9.74154 3.77497   1
  -2   0   2 477.276 31.5006  -2
   2   0   1 477.276 31.5006   1
  -3   0   2 -15.908 2.74480  -2
   3   0   1 -15.908 2.74480   1
  -4   0   2 1076.48 99.2426  -2
   4   0   1 1076.48 99.2426   1
  -5   0   3 48.9289 181.363  -2
   5   0   1 48.9289 181.363   1
  -6   0   3 1093.33 51.6021  -2
   6   0   1 1093.33 51.6021   1
  -7   0   3 -14.070 9.55924  -2
   7   0   1 -14.070 9.55924   1
  -8   0   4 959.805 48.6900  -2
   8   0   1 959.805 48.6900   1
  -9   0   4 -77.349 10.3036  -2
   9   0   1 -77.349 10.3036   1
 -10   0   4 627.194 72.1748  -2
  10   0   1 627.194 72.1748   1
 -11   0   5 -51.611 56.5856  -2
  11   0   1 -51.611 56.5856   1
 -12   0   5 -106.10 237.163  -2
  12   0   1 -106.10 237.163   1
 -15   1   4 66.0927 51.3683  -2
 -15   1   1 66.0927 51.3683   1
 -14   1   4 156.768 86.4605  -2
 -14   1   1 156.768 86.4605   1
 -12   1   3 149.667 15.5963  -2
 -12   1   1 149.667 15.5963   1
 -11   1   3 47.8873 11.6410  -2
 -11   1   1 47.8873 11.6410   1
 -10   1   2 902.739 664.168  -2
 -10   1   1 902.739 664.168   1
  -9   1   2 135.274 14.8619  -2
  -9   1   1 135.274 14.8619   1
  -8   1   2 68.7054 9.35536  -2
  -8   1   1 68.7054 9.35536   1
  -7   1   1 373.119 14.7499  -2
  -7   1   1 373.119 14.7499   1
  -6   1   1 73.3144 4.52924  -2
  -6   1   1 73.3144 4.52924   1
  -5   1   1 694.648 24.6850  -2
  -5   1   1 694.648 24.6850   1
   4   1   0 333.736 17.3182  -2
  -4   1   1 333.736 17.3182   1
   3   1   0 1548.63 46.2498  -2
  -3   1   1 1548.63 46.2498   1
   2   1   0 1926.94 110.621  -2
  -2   1   1 1926.94 110.621   1
   1   1   1 3586.41 225.718  -2
  -1   1   1 3586.41 225.718   1
   0   1   1 6033.32 157.310  -2
   0   1   1 6033.32 157.310   1
  -1   1   1 3373.57 300.286  -2
   1   1   1 3373.57 300.286   1
  -2   1   2 1978.33 124.823  -2
   2   1   1 1978.33 124.823   1
  -3   1   2 398.680 11.5303  -2
   3   1   1 398.680 11.5303   1
  -4   1   2 1228.45 52.7667  -2
   4   1   1 1228.45 52.7667   1
  -5   1   3 755.702 23.7175  -2
   5   1   1 755.702 23.7175   1
  -6   1   3 1895.20 63.1986  -2
   6   1   1 1895.20 63.1986   1
  -7   1   3 622.373 20.2669  -2
   7   1   1 622.373 20.2669   1
  -8   1   4 1212.94 49.3198  -2
   8   1   1 1212.94 49.3198   1
  -9   1   4 651.675 23.8326  -2
   9   1   1 651.675 23.8326   1
 -10   1   4 1172.16 83.6470  -2
  10   1   1 1172.16 83.6470   1
 -11   1   5 150.388 19.7098  -2
  11   1   1 150.388 19.7098   1
 -12   1   5 430.763 21.0661  -2
  12   1   1 430.763 21.0661   1
 -13   1   5 152.515 39.2097  -2
  13   1   1 152.515 39.2097   1
 -12   2   3 -244.59 251.952  -2
 -12   2   1 -244.59 251.952   1
 -11   2   3 -579.30 354.900  -2
 -11   2   1 -579.30 354.900   1
 -10   2   2 144.111 21.8062  -2
 -10   2   1 144.111 21.8062   1
  -9   2   2 127.181 9.93039  -2
  -9   2   1 127.181 9.93039   1
  -8   2   2 237.433 19.2562  -2
  -8   2   1 237.433 19.2562   1
  -7   2   1 315.050 17.3229  -2
  -7   2   1 315.050 17.3229   1
  -6   2   1 514.213 18.8839  -2
  -6   2   1 514.213 18.8839   1
  -5   2   1 1021.71 37.9063  -2
  -5   2   1 1021.71 37.9063   1
   4   2   0 471.086 21.5337  -2
  -4   2   1 471.086 21.5337   1
   3   2   0 609.371 16.7115  -2
  -3   2   1 609.371 16.7115   1
   2   2   0 2379.59 161.167  -2
  -2   2   1 2379.59 161.167   1
   1   2   1 1613.28 72.0557  -2
  -1   2   1 1613.28 72.0557   1
   0   2   1 2019.71 56.8049  -2
   0   2   1 2019.71 56.8049   1
  -1   2   1 1479.73 65.3624  -2
   1   2   1 1479.73 65.3624   1
  -2   2   2 497.490 26.2304  -2
   2   2   1 497.490 26.2304   1
  -3   2   2 213.979 7.13947  -2
   3   2   1 213.979 7.13947   1
  -4   2   2 100.608 6.37538  -2
   4   2   1 100.608 6.37538   1
  -5   2   3 1000.08 31.6057  -2
   5   2   1 1000.08 31.6057   1
  -6   2   3 137.256 8.01809  -2
   6   2   1 137.256 8.01809   1
  -7   2   3 1092.58 43.7697  -2
   7   2   1 1092.58 43.7697   1
  -8   2   4 -75.809 28.2335  -2
   8   2   1 -75.809 28.2335   1
  -9   2   4 554.554 23.0719  -2
   9   2   1 554.554 23.0719   1
 -10   2   4 -1.3987 36.4454  -2
  10   2   1 -1.3987 36.4454   1
 -11   2   5 193.398 19.8578  -2
  11   2   1 193.398 19.8578   1
 -12   2   5 -75.109 11.6672  -2
  12   2   1 -75.109 11.6672   1
 -13   2   5 -22.608 104.772  -2
  13   2   1 -22.608 104.772   1
 -14   2   6 96.8348 51.0483  -2
  14   2   1 96.8348 51.0483   1
 -13   3   3 463.762 93.8261  -2
 -13   3   1 463.762 93.8261   1
 -12   3   3 119.714 12.4297  -2
 -12   3   1 119.714 12.4297   1
 -11   3   3 232.145 35.8109  -2
 -11   3   1 232.145 35.8109   1
 -10   3   2 -44.774 46.1036  -2
 -10   3   1 -44.774 46.1036   1
  -9   3   2 148.718 10.5113  -2
  -9   3   1 148.718 10.5113   1
  -8   3   2 115.557 12.6814  -2
  -8   3   1 115.557 12.6814   1
  -7   3   1 -82.073 254.750  -2
  -7   3   1 -82.073 254.750   1
  -6   3   1 261.219 10.6371  -2
  -6   3   1 261.219 10.6371   1
  -5   3   1 599.681 28.2388  -2
  -5   3   1 599.681 28.2388   1
   4   3   0 271.040 28.5521  -2
  -4   3   1 271.040 28.5521   1
   3   3   0 1091.54 37.6961  -2
  -3   3   1 1091.54 37.6961   1
   2   3   0 399.068 31.0426  -2
  -2   3   1 399.068 31.0426   1
   1   3   1 3369.51 128.693  -2
  -1   3   1 3369.51 128.693   1
   0   3   1 647.562 22.3336  -2
   0   3   1 647.562 22.3336   1
  -1   3   1 3542.44 130.803  -2
   1   3   1 3542.44 130.803   1
  -2   3   2 418.476 23.6529  -2
   2   3   1 418.476 23.6529   1
  -3   3   2 1604.94 55.6666  -2
   3   3   1 1604.94 55.6666   1
  -4   3   2 170.867 12.5629  -2
   4   3   1 170.867 12.5629   1
  -5   3   3 1466.74 71.4970  -2
   5   3   1 1466.74 71.4970   1
  -6   3   3 149.745 10.3318  -2
   6   3   1 149.745 10.3318   1
  -7   3   3 1383.75 125.780  -2
   7   3   1 1383.75 125.780   1
  -8   3   4 205.213 16.1933  -2
   8   3   1 205.213 16.1933   1
  -9   3   4 963.236 35.0511  -2
   9   3   1 963.236 35.0511   1
 -10   3   4 20.5713 45.4289  -2
  10   3   1 20.5713 45.4289   1
 -11   3   5 752.085 50.2037  -2
  11   3   1 752.085 50.2037   1
 -12   3   5 87.1912 12.3908  -2
  12   3   1 87.1912 12.3908   1
 -13   3   5 347.161 126.626  -2
  13   3   1 347.161 126.626   1
 -14   3   6 124.304 60.1557  -2
  14   3   1 124.304 60.1557   1
 -13   4   3 183.652 38.4961  -2
 -13   4   1 183.652 38.4961   1
 -12   4   3 155.655 15.7696  -2
 -12   4   1 155.655 15.7696   1
 -11   4   3 232.755 27.5748  -2
 -11   4   1 232.755 27.5748   1
 -10   4   2 211.938 27.9803  -2
 -10   4   1 211.938 27.9803   1
  -9   4   2 166.422 14.7625  -2
  -9   4   1 166.422 14.7625   1
  -8   4   2 83.6305 23.3872  -2
  -8   4   1 83.6305 23.3872   1
  -7   4   1 824.581 71.2056  -2
  -7   4   1 824.581 71.2056   1
  -6   4   1 127.228 8.45714  -2
  -6   4   1 127.228 8.45714   1
  -5   4   1 -151.76 163.010  -2
  -5   4   1 -151.76 163.010   1
   4   4   0 112.131 10.0573  -2
  -4   4   1 112.131 10.0573   1
   3   4   0 1656.86 66.6541  -2
  -3   4   1 1656.86 66.6541   1
   2   4   0 383.850 19.9472  -2
  -2   4   1 383.850 19.9472   1
   1   4   1 1141.11 46.2054  -2
  -1   4   1 1141.11 46.2054   1
   0   4   1 156.506 7.62619  -2
   0   4   1 156.506 7.62619   1
  -1   4   1 1220.52 62.6902  -2
   1   4   1 1220.52 62.6902   1
  -2   4   2 915.953 44.8885  -2
   2   4   1 915.953 44.8885   1
  -3   4   2 207.508 9.78584  -2
   3   4   1 207.508 9.78584   1
  -4   4   2 686.534 28.8107  -2
   4   4   1 686.534 28.8107   1
  -5   4   3 -24.266 182.257  -2
   5   4   1 -24.266 182.257   1
  -6   4   3 560.472 22.6762  -2
   6   4   1 560.472 22.6762   1
  -7   4   3 48.0445 10.3702  -2
   7   4   1 48.0445 10.3702   1
  -8   4   4 416.221 37.0594  -2
   8   4   1 416.221 37.0594   1
  -9   4   4 222.421 18.1043  -2
   9   4   1 222.421 18.1043   1
 -10   4   4 309.170 33.6126  -2
  10   4   1 309.170 33.6126   1
 -11   4   5 200.968 21.5826  -2
  11   4   1 200.968 21.5826   1
 -12   4   5 80.9893 17.6910  -2
  12   4   1 80.9893 17.6910   1
 -12   5   3 125.168 17.2030  -2
 -12   5   1 125.168 17.2030   1
 -11   5   3 187.690 25.0318  -2
 -11   5   1 187.690 25.0318   1
 -10   5   2 172.150 66.3901  -2
 -10   5   1 172.150 66.3901   1
  -9   5   2 149.468 17.2505  -2
  -9   5   1 149.468 17.2505   1
  -8   5   2 793.113 507.844  -2
  -8   5   1 793.113 507.844   1
  -7   5   1 108.856 13.5441  -2
  -7   5   1 108.856 13.5441   1
  -6   5   1 186.764 8.30811  -2
  -6   5   1 186.764 8.30811   1
  -5   5   1 263.042 18.1447  -2
  -5   5   1 263.042 18.1447   1
   4   5   0 427.328 20.5363  -2
  -4   5   1 427.328 20.5363   1
   3   5   0 389.244 19.9398  -2
  -3   5   1 389.244 19.9398   1
   2   5   0 727.598 59.4421  -2
  -2   5   1 727.598 59.4421   1
   1   5   1 172.470 14.5968  -2
  -1   5   1 172.470 14.5968   1
   0   5   1 729.034 27.8650  -2
   0   5   1 729.034 27.8650   1
  -1   5   1 262.091 10.4780  -2
   1   5   1 262.091 10.4780   1
  -2   5   2 358.876 139.578  -2
   2   5   1 358.876 139.578   1
  -3   5   2 1083.01 43.0974  -2
   3   5   1 1083.01 43.0974   1
  -4   5   2 299.993 17.9778  -2
   4   5   1 299.993 17.9778   1
  -5   5   3 869.426 33.0318  -2
   5   5   1 869.426 33.0318   1
  -6   5   3 316.799 29.1720  -2
   6   5   1 316.799 29.1720   1
  -7   5   3 148.172 267.422  -2
   7   5   1 148.172 267.422   1
  -8   5   4 446.157 24.6906  -2
   8   5   1 446.157 24.6906   1
  -9   5   4 260.814 17.2447  -2
   9   5   1 260.814 17.2447   1
 -10   5   4 267.011 69.0238  -2
  10   5   1 267.011 69.0238   1
 -11   5   5 159.647 28.9028  -2
  11   5   1 159.647 28.9028   1
 -12   5   5 101.315 18.0056  -2
  12   5   1 101.315 18.0056   1
 -10   6   2 383.715 88.7344  -2
 -10   6   1 383.715 88.7344   1
  -9   6   2 393.943 23.5502  -2
  -9   6   1 393.943 23.5502   1
  -8   6   2 259.839 37.7250  -2
  -8   6   1 259.839 37.7250   1
  -7   6   1 314.680 22.1331  -2
  -7   6   1 314.680 22.1331   1
  -6   6   1 385.449 20.2545  -2
  -6   6   1 385.449 20.2545   1
  -5   6   1 476.615 21.8631  -2
  -5   6   1 476.615 21.8631   1
   4   6   0 138.064 16.2240  -2
  -4   6   1 138.064 16.2240   1
   3   6   0 192.722 12.0255  -2
  -3   6   1 192.722 12.0255   1
   2   6   0 503.919 35.4915  -2
  -2   6   1 503.919 35.4915   1
   1   6   1 230.554 14.9881  -2
  -1   6   1 230.554 14.9881   1
   0   6   1 224.264 13.3141  -2
   0   6   1 224.264 13.3141   1
  -1   6   1 332.855 16.4410  -2
   1   6   1 332.855 16.4410   1
  -2   6   2 359.017 18.7796  -2
   2   6   1 359.017 18.7796   1
  -3   6   2 477.704 22.0236  -2
   3   6   1 477.704 22.0236   1
  -4   6   2 175.823 19.3482  -2
   4   6   1 175.823 19.3482   1
  -5   6   3 300.704 14.6031  -2
   5   6   1 300.704 14.6031   1
  -6   6   3 195.684 11.7705  -2
   6   6   1 195.684 11.7705   1
  -7   6   3 217.508 27.5559  -2
   7   6   1 217.508 27.5559   1
  -8   6   4 144.309 42.1067  -2
   8   6   1 144.309 42.1067   1
  -9   6   4 172.215 20.2164  -2
   9   6   1 172.215 20.2164   1
 -10   6   4 248.207 87.3452  -2
  10   6   1 248.207 87.3452   1
  -9   7   2 151.740 16.5633  -2
  -9   7   1 151.740 16.5633   1
  -8   7   2 201.765 28.7082  -2
  -8   7   1 201.765 28.7082   1
  -7   7   1 174.727 27.2123  -2
  -7   7   1 174.727 27.2123   1
  -6   7   1 306.674 17.6621  -2
  -6   7   1 306.674 17.6621   1
  -5   7   1 283.604 20.7560  -2
  -5   7   1 283.604 20.7560   1
   4   7   0 103.348 17.5305  -2
  -4   7   1 103.348 17.5305   1
   3   7   0 252.467 13.7103  -2
  -3   7   1 252.467 13.7103   1
   2   7   0 56.9148 14.6080  -2
  -2   7   1 56.9148 14.6080   1
   1   7   1 59.0717 14.0263  -2
  -1   7   1 59.0717 14.0263   1
   0   7   1 220.999 13.9851  -2
   0   7   1 220.999 13.9851   1
  -1   7   1 52.8796 14.2254  -2
   1   7   1 52.8796 14.2254   1
  -2   7   2 385.068 23.0009  -2
   2   7   1 385.068 23.0009   1
  -3   7   2 60.4235 8.55956  -2
   3   7   1 60.4235 8.55956   1
  -4   7   2 763.879 37.1776  -2
   4   7   1 763.879 37.1776   1
  -5   7   3 155.442 17.5269  -2
   5   7   1 155.442 17.5269   1
  -6   7   3 810.572 39.5325  -2
   6   7   1 810.572 39.5325   1
  -7   7   3 166.442 35.0548  -2
   7   7   1 166.442 35.0548   1
  -8   7   4 400.619 51.1686  -2
   8   7   1 400.619 51.1686   1
  -9   7   4 32.4002 16.3677  -2
   9   7   1 32.4002 16.3677   1
  -6   8   1 369.882 23.7393  -2
  -6   8   1 369.882 23.7393   1
  -5   8   1 71.6424 17.7909  -2
  -5   8   1 71.6424 17.7909   1
   4   8   0 426.580 29.4649  -2
  -4   8   1 426.580 29.4649   1
   3   8   0 102.493 11.1608  -2
  -3   8   1 102.493 11.1608   1
   2   8   0 243.126 20.7675  -2
  -2   8   1 243.126 20.7675   1
   1   8   1 22.8841 15.7686  -2
  -1   8   1 22.8841 15.7686   1
   0   8   1 328.635 20.4305  -2
   0   8   1 328.635 20.4305   1
  -1   8   1 48.3431 16.1286  -2
   1   8   1 48.3431 16.1286   1
  -2   8   2 245.632 21.1334  -2
   2   8   1 245.632 21.1334   1
  -3   8   2 72.4280 9.76656  -2
   3   8   1 72.4280 9.76656   1
  -4   8   2 258.160 21.5149  -2
   4   8   1 258.160 21.5149   1
  -5   8   3 77.3148 19.0259  -2
   5   8   1 77.3148 19.0259   1
  -6   8   3 66.9868 12.7964  -2
   6   8   1 66.9868 12.7964   1
  -8   8   4 143.803 88.0837  -2
   8   8   1 143.803 88.0837   1
  -5   9   1 114.867 25.9453  -2
  -5   9   1 114.867 25.9453   1
   4   9   0 121.759 33.8625  -2
  -4   9   1 121.759 33.8625   1
   3   9   0 3.01729 11.2782  -2
  -3   9   1 3.01729 11.2782   1
   2   9   0 9.50415 22.2935  -2
  -2   9   1 9.50415 22.2935   1
   1   9   1 47.0855 22.1190  -2
  -1   9   1 47.0855 22.1190   1
   0   9   1 27.0291 10.2851  -2
   0   9   1 27.0291 10.2851   1
  -1   9   1 99.1605 22.7496  -2
   1   9   1 99.1605 22.7496   1
  -2   9   2 79.5762 22.6296  -2
   2   9   1 79.5762 22.6296   1
  -3   9   2 217.968 20.3416  -2
   3   9   1 217.968 20.3416   1
  -4   9   2 72.2063 33.6859  -2
   4   9   1 72.2063 33.6859   1
   5   9   1 203.567 21.7853   1
 -14   0   3 633.328 104.844  -2
 -14   0   2 633.328 104.844   1
 -12   0   2 -55.044 214.155  -2
 -12   0   2 -55.044 214.155   1
 -11   0   2 -357.28 44.9851  -2
 -11   0   2 -357.28 44.9851   1
  -9   0   1 -14.208 17.2218  -2
  -9   0   2 -14.208 17.2218   1
  -8   0   1 1227.39 104.779  -2
  -8   0   2 1227.39 104.779   1
   7   0   0 325.035 334.659  -2
  -7   0   2 325.035 334.659   1
   6   0   0 1682.13 87.7510  -2
  -6   0   2 1682.13 87.7510   1
   5   0   0 -68.018 11.3859  -2
  -5   0   2 -68.018 11.3859   1
   4   0   1 1661.36 95.5728  -2
  -4   0   2 1661.36 95.5728   1
   3   0   1 34.2630 49.8892  -2
  -3   0   2 34.2630 49.8892   1
   2   0   1 641.641 58.3523  -2
  -2   0   2 641.641 58.3523   1
   1   0   2 10.2082 3.86062  -2
  -1   0   2 10.2082 3.86062   1
   0   0   2 1823.60 72.8122  -2
   0   0   2 1823.60 72.8122   1
  -1   0   2 4.93722 5.69791  -2
   1   0   2 4.93722 5.69791   1
  -2   0   3 185.498 9.53821  -2
   2   0   2 185.498 9.53821   1
  -3   0   3 -3.0051 2.55169  -2
   3   0   2 -3.0051 2.55169   1
  -4   0   3 909.864 44.8753  -2
   4   0   2 909.864 44.8753   1
  -5   0   4 285.915 197.580  -2
   5   0   2 285.915 197.580   1
  -6   0   4 1260.99 57.3389  -2
   6   0   2 1260.99 57.3389   1
  -7   0   4 97.4662 273.243  -2
   7   0   2 97.4662 273.243   1
  -8   0   5 1288.91 106.482  -2
   8   0   2 1288.91 106.482   1
  -9   0   5 -80.585 12.0729  -2
   9   0   2 -80.585 12.0729   1
 -10   0   5 1327.73 146.966  -2
  10   0   2 1327.73 146.966   1
 -11   0   6 21.8193 34.6463  -2
  11   0   2 21.8193 34.6463   1
 -12   0   6 -292.03 250.534  -2
  12   0   2 -292.03 250.534   1
 -14   1   3 317.736 60.7691  -2
 -14   1   2 317.736 60.7691   1
 -12   1   2 194.143 21.9370  -2
 -12   1   2 194.143 21.9370   1
 -11   1   2 1165.55 511.374  -2
 -11   1   2 1165.55 511.374   1
 -10   1   1 -40.059 261.199  -2
 -10   1   2 -40.059 261.199   1
  -9   1   1 42.0548 6.89216  -2
  -9   1   2 42.0548 6.89216   1
  -8   1   1 160.264 12.3725  -2
  -8   1   2 160.264 12.3725   1
   7   1   0 373.967 16.9012  -2
  -7   1   2 373.967 16.9012   1
   6   1   0 734.210 25.6786  -2
  -6   1   2 734.210 25.6786   1
   5   1   0 491.666 17.5279  -2
  -5   1   2 491.666 17.5279   1
   4   1   1 1331.33 49.0008  -2
  -4   1   2 1331.33 49.0008   1
   3   1   1 142.869 4.64396  -2
  -3   1   2 142.869 4.64396   1
   2   1   1 1365.70 46.2650  -2
  -2   1   2 1365.70 46.2650   1
   1   1   2 86.9542 4.97511  -2
  -1   1   2 86.9542 4.97511   1
   0   1   2 282.726 7.42134  -2
   0   1   2 282.726 7.42134   1
  -1   1   2 133.124 9.07197  -2
   1   1   2 133.124 9.07197   1
  -2   1   3 1293.41 46.5502  -2
   2   1   2 1293.41 46.5502   1
  -3   1   3 277.573 9.70027  -2
   3   1   2 277.573 9.70027   1
  -4   1   3 2734.03 79.1127  -2
   4   1   2 2734.03 79.1127   1
  -5   1   4 1019.93 34.5211  -2
   5   1   2 1019.93 34.5211   1
  -6   1   4 1735.63 55.0709  -2
   6   1   2 1735.63 55.0709   1
  -7   1   4 615.063 24.9692  -2
   7   1   2 615.063 24.9692   1
  -8   1   5 1009.57 50.5696  -2
   8   1   2 1009.57 50.5696   1
  -9   1   5 298.252 14.1790  -2
   9   1   2 298.252 14.1790   1
 -10   1   5 525.710 53.6119  -2
  10   1   2 525.710 53.6119   1
 -11   1   6 96.6156 21.8174  -2
  11   1   2 96.6156 21.8174   1
 -12   1   6 -274.36 229.165  -2
  12   1   2 -274.36 229.165   1
 -14   2   3 200.373 57.9168  -2
 -14   2   2 200.373 57.9168   1
 -12   2   2 319.280 17.2678  -2
 -12   2   2 319.280 17.2678   1
 -11   2   2 154.546 17.0726  -2
 -11   2   2 154.546 17.0726   1
 -10   2   1 162.934 18.6631  -2
 -10   2   2 162.934 18.6631   1
  -9   2   1 368.586 19.5714  -2
  -9   2   2 368.586 19.5714   1
  -8   2   1 18.6404 223.545  -2
  -8   2   2 18.6404 223.545   1
   7   2   0 1487.36 54.9967  -2
  -7   2   2 1487.36 54.9967   1
   6   2   0 257.455 9.38074  -2
  -6   2   2 257.455 9.38074   1
   5   2   0 990.105 38.1564  -2
  -5   2   2 990.105 38.1564   1
   4   2   1 35.1568 6.30916  -2
  -4   2   2 35.1568 6.30916   1
   3   2   1 375.413 10.8590  -2
  -3   2   2 375.413 10.8590   1
   2   2   1 201.901 11.5912  -2
  -2   2   2 201.901 11.5912   1
   1   2   2 104.419 7.13176  -2
  -1   2   2 104.419 7.13176   1
   0   2   2 238.528 8.68804  -2
   0   2   2 238.528 8.68804   1
  -1   2   2 162.138 9.48982  -2
   1   2   2 162.138 9.48982   1
  -2   2   3 411.724 19.4670  -2
   2   2   2 411.724 19.4670   1
  -3   2   3 464.029 16.1211  -2
   3   2   2 464.029 16.1211   1
  -4   2   3 417.365 15.2551  -2
   4   2   2 417.365 15.2551   1
  -5   2   4 751.025 24.0958  -2
   5   2   2 751.025 24.0958   1
  -6   2   4 369.073 12.4407  -2
   6   2   2 369.073 12.4407   1
  -7   2   4 616.429 24.4795  -2
   7   2   2 616.429 24.4795   1
  -8   2   5 255.375 15.6764  -2
   8   2   2 255.375 15.6764   1
  -9   2   5 823.926 31.4328  -2
   9   2   2 823.926 31.4328   1
 -10   2   5 396.109 33.8972  -2
  10   2   2 396.109 33.8972   1
 -11   2   6 298.162 33.1213  -2
  11   2   2 298.162 33.1213   1
 -12   2   6 -178.21 66.2148  -2
  12   2   2 -178.21 66.2148   1
 -13   2   6 189.075 113.003  -2
  13   2   2 189.075 113.003   1
 -13   3   2 131.251 33.3344  -2
 -13   3   2 131.251 33.3344   1
 -12   3   2 74.4331 13.4312  -2
 -12   3   2 74.4331 13.4312   1
 -11   3   2 290.288 33.4969  -2
 -11   3   2 290.288 33.4969   1
 -10   3   1 105.604 49.0147  -2
 -10   3   2 105.604 49.0147   1
  -9   3   1 64.8431 8.46501  -2
  -9   3   2 64.8431 8.46501   1
  -8   3   1 244.909 23.4656  -2
  -8   3   2 244.909 23.4656   1
   7   3   0 566.043 26.2937  -2
  -7   3   2 566.043 26.2937   1
   6   3   0 278.543 11.7143  -2
  -6   3   2 278.543 11.7143   1
   5   3   0 533.873 26.6518  -2
  -5   3   2 533.873 26.6518   1
   4   3   1 103.220 9.27666  -2
  -4   3   2 103.220 9.27666   1
   3   3   1 1362.69 48.3139  -2
  -3   3   2 1362.69 48.3139   1
   2   3   1 314.773 14.3351  -2
  -2   3   2 314.773 14.3351   1
   1   3   2 437.103 25.6570  -2
  -1   3   2 437.103 25.6570   1
   0   3   2 578.929 18.5873  -2
   0   3   2 578.929 18.5873   1
  -1   3   2 502.339 23.6335  -2
   1   3   2 502.339 23.6335   1
  -2   3   3 581.640 24.0446  -2
   2   3   2 581.640 24.0446   1
  -3   3   3 1676.18 53.2147  -2
   3   3   2 1676.18 53.2147   1
  -4   3   3 335.053 16.4756  -2
   4   3   2 335.053 16.4756   1
  -5   3   4 1202.94 59.0908  -2
   5   3   2 1202.94 59.0908   1
  -6   3   4 168.266 8.82547  -2
   6   3   2 168.266 8.82547   1
  -7   3   4 1389.95 73.0266  -2
   7   3   2 1389.95 73.0266   1
  -8   3   5 -45.932 14.6580  -2
   8   3   2 -45.932 14.6580   1
  -9   3   5 754.296 31.1182  -2
   9   3   2 754.296 31.1182   1
 -10   3   5 728.458 498.141  -2
  10   3   2 728.458 498.141   1
 -11   3   6 426.047 27.4019  -2
  11   3   2 426.047 27.4019   1
 -12   3   6 45.4206 11.1044  -2
  12   3   2 45.4206 11.1044   1
  14   3   2 44.0996 42.3833   1
 -13   4   2 398.831 48.4283  -2
 -13   4   2 398.831 48.4283   1
 -12   4   2 50.6146 13.5340  -2
 -12   4   2 50.6146 13.5340   1
 -11   4   2 439.160 38.6670  -2
 -11   4   2 439.160 38.6670   1
 -10   4   1 -90.440 27.2432  -2
 -10   4   2 -90.440 27.2432   1
  -9   4   1 333.059 14.6276  -2
  -9   4   2 333.059 14.6276   1
  -8   4   1 207.173 20.8472  -2
  -8   4   2 207.173 20.8472   1
   7   4   0 83.3594 182.625  -2
  -7   4   2 83.3594 182.625   1
   6   4   0 625.339 26.5213  -2
  -6   4   2 625.339 26.5213   1
   5   4   0 267.871 20.4441  -2
  -5   4   2 267.871 20.4441   1
   4   4   1 921.570 47.2497  -2
  -4   4   2 921.570 47.2497   1
   3   4   1 58.3511 5.78374  -2
  -3   4   2 58.3511 5.78374   1
   2   4   1 1074.75 39.9033  -2
  -2   4   2 1074.75 39.9033   1
   1   4   2 89.9578 8.69512  -2
  -1   4   2 89.9578 8.69512   1
   0   4   2 140.108 10.1516  -2
   0   4   2 140.108 10.1516   1
  -1   4   2 226.093 15.6395  -2
   1   4   2 226.093 15.6395   1
  -2   4   3 212.021 11.7630  -2
   2   4   2 212.021 11.7630   1
  -3   4   3 536.329 19.6227  -2
   3   4   2 536.329 19.6227   1
  -4   4   3 103.496 9.74998  -2
   4   4   2 103.496 9.74998   1
  -5   4   4 981.321 44.4526  -2
   5   4   2 981.321 44.4526   1
  -6   4   4 100.543 17.9144  -2
   6   4   2 100.543 17.9144   1
  -7   4   4 1168.02 44.9683  -2
   7   4   2 1168.02 44.9683   1
  -8   4   5 51.0396 21.5579  -2
   8   4   2 51.0396 21.5579   1
  -9   4   5 419.808 23.7429  -2
   9   4   2 419.808 23.7429   1
 -10   4   5 174.593 45.1746  -2
  10   4   2 174.593 45.1746   1
 -11   4   6 424.585 41.9284  -2
  11   4   2 424.585 41.9284   1
 -12   4   6 113.568 16.5162  -2
  12   4   2 113.568 16.5162   1
 -13   4   6 219.180 67.6027  -2
  13   4   2 219.180 67.6027   1
 -12   5   2 47.5215 15.9807  -2
 -12   5   2 47.5215 15.9807   1
 -11   5   2 418.253 30.5100  -2
 -11   5   2 418.253 30.5100   1
 -10   5   1 48.2490 48.7405  -2
 -10   5   2 48.2490 48.7405   1
  -9   5   1 541.404 22.7996  -2
  -9   5   2 541.404 22.7996   1
  -8   5   1 1480.19 480.350  -2
  -8   5   2 1480.19 480.350   1
   7   5   0 996.652 49.8692  -2
  -7   5   2 996.652 49.8692   1
   6   5   0 18.0411 6.00714  -2
  -6   5   2 18.0411 6.00714   1
   5   5   0 -122.53 149.701  -2
  -5   5   2 -122.53 149.701   1
   4   5   1 155.411 16.0527  -2
  -4   5   2 155.411 16.0527   1
   3   5   1 724.383 27.6414  -2
  -3   5   2 724.383 27.6414   1
   2   5   1 479.059 28.2602  -2
  -2   5   2 479.059 28.2602   1
   1   5   2 1252.51 56.0873  -2
  -1   5   2 1252.51 56.0873   1
   0   5   2 144.273 7.63146  -2
   0   5   2 144.273 7.63146   1
  -1   5   2 1690.30 60.0535  -2
   1   5   2 1690.30 60.0535   1
  -2   5   3 37.2175 183.871  -2
   2   5   2 37.2175 183.871   1
  -3   5   3 1088.25 41.1353  -2
   3   5   2 1088.25 41.1353   1
  -4   5   3 598.990 28.3432  -2
   4   5   2 598.990 28.3432   1
  -5   5   4 507.690 29.5414  -2
   5   5   2 507.690 29.5414   1
  -6   5   4 516.781 21.9333  -2
   6   5   2 516.781 21.9333   1
  -7   5   4 13.0857 293.105  -2
   7   5   2 13.0857 293.105   1
  -8   5   5 451.341 37.9976  -2
   8   5   2 451.341 37.9976   1
  -9   5   5 128.380 17.5975  -2
   9   5   2 128.380 17.5975   1
 -10   5   5 301.189 37.2668  -2
  10   5   2 301.189 37.2668   1
 -11   5   6 223.522 39.9711  -2
  11   5   2 223.522 39.9711   1
 -12   5   6 89.0433 20.0371  -2
  12   5   2 89.0433 20.0371   1
 -10   6   1 284.529 68.9893  -2
 -10   6   2 284.529 68.9893   1
  -9   6   1 120.935 14.4910  -2
  -9   6   2 120.935 14.4910   1
  -8   6   1 59.3015 48.3030  -2
  -8   6   2 59.3015 48.3030   1
   7   6   0 108.312 21.3431  -2
  -7   6   2 108.312 21.3431   1
   6   6   0 140.663 13.3384  -2
  -6   6   2 140.663 13.3384   1
   5   6   0 451.456 23.8284  -2
  -5   6   2 451.456 23.8284   1
   4   6   1 -62.347 21.0347  -2
  -4   6   2 -62.347 21.0347   1
   3   6   1 582.607 25.6626  -2
  -3   6   2 582.607 25.6626   1
   2   6   1 264.026 21.0003  -2
  -2   6   2 264.026 21.0003   1
   1   6   2 201.435 17.1240  -2
  -1   6   2 201.435 17.1240   1
   0   6   2 77.9303 9.63363  -2
   0   6   2 77.9303 9.63363   1
  -1   6   2 120.616 9.98767  -2
   1   6   2 120.616 9.98767   1
  -2   6   3 417.351 18.1056  -2
   2   6   2 417.351 18.1056   1
  -3   6   3 23.4199 7.12685  -2
   3   6   2 23.4199 7.12685   1
  -4   6   3 307.647 23.3037  -2
   4   6   2 307.647 23.3037   1
  -5   6   4 228.714 23.4028  -2
   5   6   2 228.714 23.4028   1
  -6   6   4 419.461 23.0990  -2
   6   6   2 419.461 23.0990   1
  -7   6   4 164.199 26.6103  -2
   7   6   2 164.199 26.6103   1
  -8   6   5 273.909 35.8625  -2
   8   6   2 273.909 35.8625   1
  -9   6   5 67.4194 19.4172  -2
   9   6   2 67.4194 19.4172   1
 -10   6   5 311.271 88.4200  -2
  10   6   2 311.271 88.4200   1
  -9   7   1 161.997 20.8765  -2
  -9   7   2 161.997 20.8765   1
  -8   7   1 421.636 37.7300  -2
  -8   7   2 421.636 37.7300   1
   7   7   0 102.442 26.1684  -2
  -7   7   2 102.442 26.1684   1
   6   7   0 248.553 21.9366  -2
  -6   7   2 248.553 21.9366   1
   5   7   0 224.184 18.5080  -2
  -5   7   2 224.184 18.5080   1
   4   7   1 386.897 28.2753  -2
  -4   7   2 386.897 28.2753   1
   3   7   1 84.2834 8.37201  -2
  -3   7   2 84.2834 8.37201   1
   2   7   1 196.485 19.0789  -2
  -2   7   2 196.485 19.0789   1
   1   7   2 125.638 14.7106  -2
  -1   7   2 125.638 14.7106   1
   0   7   2 432.432 21.5863  -2
   0   7   2 432.432 21.5863   1
  -1   7   2 14.3247 33.1535  -2
   1   7   2 14.3247 33.1535   1
  -2   7   3 778.607 42.3916  -2
   2   7   2 778.607 42.3916   1
  -3   7   3 175.508 13.4091  -2
   3   7   2 175.508 13.4091   1
  -4   7   3 858.937 41.5286  -2
   4   7   2 858.937 41.5286   1
  -5   7   4 133.164 16.3077  -2
   5   7   2 133.164 16.3077   1
  -6   7   4 223.607 14.3009  -2
   6   7   2 223.607 14.3009   1
  -7   7   4 129.497 67.2821  -2
   7   7   2 129.497 67.2821   1
  -8   7   5 151.299 31.7109  -2
   8   7   2 151.299 31.7109   1
  -9   7   5 59.4111 20.1179  -2
   9   7   2 59.4111 20.1179   1
   6   8   0 153.739 17.4512  -2
  -6   8   2 153.739 17.4512   1
   5   8   0 206.309 19.7671  -2
  -5   8   2 206.309 19.7671   1
   4   8   1 220.416 23.8156  -2
  -4   8   2 220.416 23.8156   1
   3   8   1 68.3734 9.79476  -2
  -3   8   2 68.3734 9.79476   1
   2   8   1 196.220 19.0046  -2
  -2   8   2 196.220 19.0046   1
   1   8   2 99.5974 25.0939  -2
  -1   8   2 99.5974 25.0939   1
   0   8   2 34.0234 8.07693  -2
   0   8   2 34.0234 8.07693   1
  -1   8   2 235.639 20.4967  -2
   1   8   2 235.639 20.4967   1
  -2   8   3 119.710 18.4041  -2
   2   8   2 119.710 18.4041   1
  -3   8   3 310.789 21.5376  -2
   3   8   2 310.789 21.5376   1
  -4   8   3 157.498 20.1535  -2
   4   8   2 157.498 20.1535   1
  -5   8   4 175.909 26.6189  -2
   5   8   2 175.909 26.6189   1
  -6   8   4 206.696 16.4153  -2
   6   8   2 206.696 16.4153   1
   5   9   0 69.2395 38.3093  -2
  -5   9   2 69.2395 38.3093   1
   4   9   1 194.541 31.8634  -2
  -4   9   2 194.541 31.8634   1
   3   9   1 77.8888 15.2107  -2
  -3   9   2 77.8888 15.2107   1
   2   9   1 215.591 35.8146  -2
  -2   9   2 215.591 35.8146   1
   1   9   2 214.051 23.4150  -2
  -1   9   2 214.051 23.4150   1
   0   9   2 366.147 21.5758  -2
   0   9   2 366.147 21.5758   1
  -1   9   2 151.392 32.6000  -2
   1   9   2 151.392 32.6000   1
  -2   9   3 181.614 34.9454  -2
   2   9   2 181.614 34.9454   1
  -3   9   3 187.740 28.4175  -2
   3   9   2 187.740 28.4175   1
  -4   9   3 123.486 35.4982  -2
   4   9   2 123.486 35.4982   1
 -14   0   2 363.108 92.5432  -2
 -14   0   3 363.108 92.5432   1
 -12   0   1 406.345 34.7489  -2
 -12   0   3 406.345 34.7489   1
 -11   0   1 515.455 701.155  -2
 -11   0   3 515.455 701.155   1
  10   0   0 1264.05 613.624  -2
 -10   0   3 1264.05 613.624   1
   9   0   0 165.738 189.958  -2
  -9   0   3 165.738 189.958   1
   8   0   0 694.896 29.0072  -2
  -8   0   3 694.896 29.0072   1
   7   0   1 24.0829 26.6411  -2
  -7   0   3 24.0829 26.6411   1
   6   0   1 650.375 34.5358  -2
  -6   0   3 650.375 34.5358   1
   5   0   1 -5.3573 5.57321  -2
  -5   0   3 -5.3573 5.57321   1
   4   0   2 1528.49 69.7916  -2
  -4   0   3 1528.49 69.7916   1
   3   0   2 -5.7341 1.90473  -2
  -3   0   3 -5.7341 1.90473   1
   2   0   2 466.515 26.1421  -2
  -2   0   3 466.515 26.1421   1
   1   0   3 -5.1097 7.42675  -2
  -1   0   3 -5.1097 7.42675   1
   0   0   3 1184.95 36.9762  -2
   0   0   3 1184.95 36.9762   1
  -1   0   3 -24.224 3.77771  -2
   1   0   3 -24.224 3.77771   1
  -2   0   4 2128.51 95.6380  -2
   2   0   3 2128.51 95.6380   1
  -3   0   4 -0.1475 3.81722  -2
   3   0   3 -0.1475 3.81722   1
  -4   0   4 5282.42 212.552  -2
   4   0   3 5282.42 212.552   1
  -5   0   5 53.8606 6.88321  -2
   5   0   3 53.8606 6.88321   1
  -6   0   5 1119.91 51.1130  -2
   6   0   3 1119.91 51.1130   1
  -7   0   5 404.465 289.706  -2
   7   0   3 404.465 289.706   1
  -8   0   6 315.389 366.712  -2
   8   0   3 315.389 366.712   1
  -9   0   6 39.2071 12.1589  -2
   9   0   3 39.2071 12.1589   1
 -10   0   6 782.849 51.6036  -2
  10   0   3 782.849 51.6036   1
 -11   0   7 -9.6190 30.4047  -2
  11   0   3 -9.6190 30.4047   1
 -12   0   7 243.779 33.8852  -2
  12   0   3 243.779 33.8852   1
 -15   1   2 179.298 41.3485  -2
 -15   1   3 179.298 41.3485   1
 -14   1   2 656.346 52.1525  -2
 -14   1   3 656.346 52.1525   1
 -12   1   1 321.787 29.0120  -2
 -12   1   3 321.787 29.0120   1
 -11   1   1 -151.06 305.914  -2
 -11   1   3 -151.06 305.914   1
  10   1   0 1260.89 58.4497  -2
 -10   1   3 1260.89 58.4497   1
   9   1   0 881.147 34.2279  -2
  -9   1   3 881.147 34.2279   1
   8   1   0 1586.53 85.7758  -2
  -8   1   3 1586.53 85.7758   1
   7   1   1 1484.71 62.9028  -2
  -7   1   3 1484.71 62.9028   1
   6   1   1 2787.38 80.5330  -2
  -6   1   3 2787.38 80.5330   1
   5   1   1 1288.25 49.8381  -2
  -5   1   3 1288.25 49.8381   1
   4   1   2 2743.93 114.386  -2
  -4   1   3 2743.93 114.386   1
   3   1   2 97.7640 4.03444  -2
  -3   1   3 97.7640 4.03444   1
   2   1   2 1057.91 53.5555  -2
  -2   1   3 1057.91 53.5555   1
   1   1   3 363.964 17.6288  -2
  -1   1   3 363.964 17.6288   1
   0   1   3 24.1589 2.21887  -2
   0   1   3 24.1589 2.21887   1
  -1   1   3 488.030 21.8064  -2
   1   1   3 488.030 21.8064   1
  -2   1   4 414.649 14.9664  -2
   2   1   3 414.649 14.9664   1
  -3   1   4 286.925 9.75836  -2
   3   1   3 286.925 9.75836   1
  -4   1   4 87.7310 6.48243  -2
   4   1   3 87.7310 6.48243   1
  -5   1   5 154.269 6.29631  -2
   5   1   3 154.269 6.29631   1
  -6   1   5 223.324 9.12308  -2
   6   1   3 223.324 9.12308   1
  -7   1   5 194.734 9.68446  -2
   7   1   3 194.734 9.68446   1
  -8   1   6 202.856 14.0393  -2
   8   1   3 202.856 14.0393   1
  -9   1   6 107.079 9.52320  -2
   9   1   3 107.079 9.52320   1
 -10   1   6 257.761 44.1615  -2
  10   1   3 257.761 44.1615   1
 -11   1   7 -134.47 28.5345  -2
  11   1   3 -134.47 28.5345   1
 -12   1   7 -114.70 262.188  -2
  12   1   3 -114.70 262.188   1
 -15   2   2 230.593 71.1005  -2
 -15   2   3 230.593 71.1005   1
 -14   2   2 188.382 58.4558  -2
 -14   2   3 188.382 58.4558   1
 -12   2   1 -678.44 780.396  -2
 -12   2   3 -678.44 780.396   1
 -11   2   1 184.063 16.8541  -2
 -11   2   3 184.063 16.8541   1
  10   2   0 170.056 16.8737  -2
 -10   2   3 170.056 16.8737   1
   9   2   0 197.717 10.2588  -2
  -9   2   3 197.717 10.2588   1
   8   2   0 125.378 198.034  -2
  -8   2   3 125.378 198.034   1
   7   2   1 607.636 31.3799  -2
  -7   2   3 607.636 31.3799   1
   6   2   1 69.2682 5.20112  -2
  -6   2   3 69.2682 5.20112   1
   5   2   1 726.088 29.6872  -2
  -5   2   3 726.088 29.6872   1
   4   2   2 165.878 11.6852  -2
  -4   2   3 165.878 11.6852   1
   3   2   2 438.669 13.3163  -2
  -3   2   3 438.669 13.3163   1
   2   2   2 565.087 21.5972  -2
  -2   2   3 565.087 21.5972   1
   1   2   3 237.366 12.9999  -2
  -1   2   3 237.366 12.9999   1
   0   2   3 1389.68 40.7705  -2
   0   2   3 1389.68 40.7705   1
  -1   2   3 237.582 10.7768  -2
   1   2   3 237.582 10.7768   1
  -2   2   4 748.588 27.9656  -2
   2   2   3 748.588 27.9656   1
  -3   2   4 2011.90 61.6935  -2
   3   2   3 2011.90 61.6935   1
  -4   2   4 658.977 22.9938  -2
   4   2   3 658.977 22.9938   1
  -5   2   5 1484.43 44.3213  -2
   5   2   3 1484.43 44.3213   1
  -6   2   5 715.210 24.7874  -2
   6   2   3 715.210 24.7874   1
  -7   2   5 1346.22 55.9549  -2
   7   2   3 1346.22 55.9549   1
  -8   2   6 383.045 14.3759  -2
   8   2   3 383.045 14.3759   1
  -9   2   6 772.117 26.4457  -2
   9   2   3 772.117 26.4457   1
 -10   2   6 280.178 18.9286  -2
  10   2   3 280.178 18.9286   1
 -11   2   7 445.776 27.1348  -2
  11   2   3 445.776 27.1348   1
 -12   2   7 152.484 17.2616  -2
  12   2   3 152.484 17.2616   1
 -13   2   7 37.3832 114.450  -2
  13   2   3 37.3832 114.450   1
 -12   3   1 -452.26 787.609  -2
 -12   3   3 -452.26 787.609   1
 -11   3   1 929.666 45.3157  -2
 -11   3   3 929.666 45.3157   1
  10   3   0 -203.86 51.3828  -2
 -10   3   3 -203.86 51.3828   1
   9   3   0 930.862 37.7551  -2
  -9   3   3 930.862 37.7551   1
   8   3   0 61.8629 14.7020  -2
  -8   3   3 61.8629 14.7020   1
   7   3   1 2023.55 121.137  -2
  -7   3   3 2023.55 121.137   1
   6   3   1 95.5176 8.69709  -2
  -6   3   3 95.5176 8.69709   1
   5   3   1 1443.67 56.2644  -2
  -5   3   3 1443.67 56.2644   1
   4   3   2 328.662 19.0895  -2
  -4   3   3 328.662 19.0895   1
   3   3   2 1401.01 43.6418  -2
  -3   3   3 1401.01 43.6418   1
   2   3   2 449.265 16.1562  -2
  -2   3   3 449.265 16.1562   1
   1   3   3 199.071 9.11092  -2
  -1   3   3 199.071 9.11092   1
   0   3   3 453.224 16.3068  -2
   0   3   3 453.224 16.3068   1
  -1   3   3 139.073 8.22909  -2
   1   3   3 139.073 8.22909   1
  -2   3   4 85.5107 8.54474  -2
   2   3   3 85.5107 8.54474   1
  -3   3   4 140.412 6.65751  -2
   3   3   3 140.412 6.65751   1
  -4   3   4 270.464 10.3660  -2
   4   3   3 270.464 10.3660   1
  -5   3   5 129.488 8.36879  -2
   5   3   3 129.488 8.36879   1
  -6   3   5 116.436 8.25839  -2
   6   3   3 116.436 8.25839   1
  -7   3   5 256.621 15.3629  -2
   7   3   3 256.621 15.3629   1
  -8   3   6 943.512 381.921  -2
   8   3   3 943.512 381.921   1
  -9   3   6 187.332 13.6957  -2
   9   3   3 187.332 13.6957   1
 -10   3   6 74.5820 46.1234  -2
  10   3   3 74.5820 46.1234   1
 -11   3   7 274.813 29.3372  -2
  11   3   3 274.813 29.3372   1
 -12   3   7 77.1411 17.2402  -2
  12   3   3 77.1411 17.2402   1
 -13   4   1 0.98640 32.2687  -2
 -13   4   3 0.98640 32.2687   1
 -12   4   1 106.356 17.9361  -2
 -12   4   3 106.356 17.9361   1
 -11   4   1 135.398 27.5575  -2
 -11   4   3 135.398 27.5575   1
  10   4   0 83.8087 22.8835  -2
 -10   4   3 83.8087 22.8835   1
   9   4   0 166.199 9.47703  -2
  -9   4   3 166.199 9.47703   1
   8   4   0 292.793 20.3901  -2
  -8   4   3 292.793 20.3901   1
   7   4   1 252.692 226.642  -2
  -7   4   3 252.692 226.642   1
   6   4   1 284.594 13.3224  -2
  -6   4   3 284.594 13.3224   1
   5   4   1 82.6897 7.56050  -2
  -5   4   3 82.6897 7.56050   1
   4   4   2 32.0207 8.92763  -2
  -4   4   3 32.0207 8.92763   1
   3   4   2 448.764 17.1526  -2
  -3   4   3 448.764 17.1526   1
   2   4   2 220.211 11.2245  -2
  -2   4   3 220.211 11.2245   1
   1   4   3 466.251 21.2323  -2
  -1   4   3 466.251 21.2323   1
   0   4   3 494.979 16.5964  -2
   0   4   3 494.979 16.5964   1
  -1   4   3 817.172 35.9790  -2
   1   4   3 817.172 35.9790   1
  -2   4   4 797.480 33.5699  -2
   2   4   3 797.480 33.5699   1
  -3   4   4 1425.13 45.3683  -2
   3   4   3 1425.13 45.3683   1
  -4   4   4 694.846 35.2696  -2
   4   4   3 694.846 35.2696   1
  -5   4   5 900.386 52.4765  -2
   5   4   3 900.386 52.4765   1
  -6   4   5 319.241 15.3755  -2
   6   4   3 319.241 15.3755   1
  -7   4   5 712.303 38.5849  -2
   7   4   3 712.303 38.5849   1
  -8   4   6 -9.9079 33.2099  -2
   8   4   3 -9.9079 33.2099   1
  -9   4   6 532.536 25.6697  -2
   9   4   3 532.536 25.6697   1
 -10   4   6 109.395 53.9068  -2
  10   4   3 109.395 53.9068   1
 -11   4   7 370.612 34.6225  -2
  11   4   3 370.612 34.6225   1
 -12   4   7 21.8709 14.0497  -2
  12   4   3 21.8709 14.0497   1
 -13   5   1 224.924 47.5862  -2
 -13   5   3 224.924 47.5862   1
 -12   5   1 207.073 18.3722  -2
 -12   5   3 207.073 18.3722   1
 -11   5   1 321.238 32.6845  -2
 -11   5   3 321.238 32.6845   1
  10   5   0 -5.7319 28.2033  -2
 -10   5   3 -5.7319 28.2033   1
   9   5   0 -34.045 34.0924  -2
  -9   5   3 -34.045 34.0924   1
   8   5   0 599.583 35.1067  -2
  -8   5   3 599.583 35.1067   1
   7   5   1 241.393 21.3401  -2
  -7   5   3 241.393 21.3401   1
   6   5   1 646.701 28.2219  -2
  -6   5   3 646.701 28.2219   1
   5   5   1 403.175 28.3462  -2
  -5   5   3 403.175 28.3462   1
   4   5   2 590.414 35.1161  -2
  -4   5   3 590.414 35.1161   1
   3   5   2 984.673 38.1162  -2
  -3   5   3 984.673 38.1162   1
   2   5   2 -398.51 318.627  -2
  -2   5   3 -398.51 318.627   1
   1   5   3 -45.225 330.152  -2
  -1   5   3 -45.225 330.152   1
   0   5   3 257.050 13.0141  -2
   0   5   3 257.050 13.0141   1
  -1   5   3 417.479 30.0662  -2
   1   5   3 417.479 30.0662   1
  -2   5   4 189.180 13.0501  -2
   2   5   3 189.180 13.0501   1
  -3   5   4 119.686 9.12901  -2
   3   5   3 119.686 9.12901   1
  -4   5   4 137.699 11.6363  -2
   4   5   3 137.699 11.6363   1
  -5   5   5 256.532 17.0980  -2
   5   5   3 256.532 17.0980   1
  -6   5   5 142.730 14.0407  -2
   6   5   3 142.730 14.0407   1
  -7   5   5 530.991 20.3164  -2
   7   5   3 530.991 20.3164   1
  -8   5   6 103.926 23.9970  -2
   8   5   3 103.926 23.9970   1
  -9   5   6 98.2389 17.7437  -2
   9   5   3 98.2389 17.7437   1
 -10   5   6 228.088 34.7431  -2
  10   5   3 228.088 34.7431   1
 -11   5   7 171.885 61.8447  -2
  11   5   3 171.885 61.8447   1
 -12   5   7 84.7218 27.5704  -2
  12   5   3 84.7218 27.5704   1
 -11   6   1 341.935 85.1194  -2
 -11   6   3 341.935 85.1194   1
  10   6   0 35.5864 30.9463  -2
 -10   6   3 35.5864 30.9463   1
   9   6   0 179.037 15.8055  -2
  -9   6   3 179.037 15.8055   1
   8   6   0 133.932 34.0027  -2
  -8   6   3 133.932 34.0027   1
   7   6   1 235.340 18.2536  -2
  -7   6   3 235.340 18.2536   1
   6   6   1 524.545 148.732  -2
  -6   6   3 524.545 148.732   1
   5   6   1 283.885 13.9822  -2
  -5   6   3 283.885 13.9822   1
   4   6   2 -97.999 529.422  -2
  -4   6   3 -97.999 529.422   1
   3   6   2 -48.184 8.13111  -2
  -3   6   3 -48.184 8.13111   1
   2   6   2 163.778 19.6919  -2
  -2   6   3 163.778 19.6919   1
   1   6   3 897.788 40.4091  -2
  -1   6   3 897.788 40.4091   1
   0   6   3 189.105 12.2152  -2
   0   6   3 189.105 12.2152   1
  -1   6   3 850.452 34.7374  -2
   1   6   3 850.452 34.7374   1
  -2   6   4 792.943 45.5730  -2
   2   6   3 792.943 45.5730   1
  -3   6   4 866.849 36.3047  -2
   3   6   3 866.849 36.3047   1
  -4   6   4 598.467 33.5517  -2
   4   6   3 598.467 33.5517   1
  -5   6   5 428.862 22.6453  -2
   5   6   3 428.862 22.6453   1
  -6   6   5 426.891 24.0953  -2
   6   6   3 426.891 24.0953   1
  -7   6   5 291.610 29.7167  -2
   7   6   3 291.610 29.7167   1
  -8   6   6 213.595 30.9434  -2
   8   6   3 213.595 30.9434   1
  -9   6   6 99.2433 20.8680  -2
   9   6   3 99.2433 20.8680   1
  11   6   3 112.599 40.9596   1
   9   7   0 83.6679 25.7140  -2
  -9   7   3 83.6679 25.7140   1
   8   7   0 227.566 28.6141  -2
  -8   7   3 227.566 28.6141   1
   7   7   1 114.059 26.6874  -2
  -7   7   3 114.059 26.6874   1
   6   7   1 370.513 27.8968  -2
  -6   7   3 370.513 27.8968   1
   5   7   1 214.843 22.5632  -2
  -5   7   3 214.843 22.5632   1
   4   7   2 724.987 45.4603  -2
  -4   7   3 724.987 45.4603   1
   3   7   2 237.433 14.1131  -2
  -3   7   3 237.433 14.1131   1
   2   7   2 667.045 33.6101  -2
  -2   7   3 667.045 33.6101   1
   1   7   3 98.7031 14.4493  -2
  -1   7   3 98.7031 14.4493   1
   0   7   3 337.098 17.7214  -2
   0   7   3 337.098 17.7214   1
  -1   7   3 80.8276 15.9806  -2
   1   7   3 80.8276 15.9806   1
  -2   7   4 75.0576 15.9238  -2
   2   7   3 75.0576 15.9238   1
  -3   7   4 125.202 12.2135  -2
   3   7   3 125.202 12.2135   1
  -4   7   4 106.823 15.1254  -2
   4   7   3 106.823 15.1254   1
  -5   7   5 196.236 17.6028  -2
   5   7   3 196.236 17.6028   1
  -6   7   5 133.671 12.6099  -2
   6   7   3 133.671 12.6099   1
  -7   7   5 116.840 31.2464  -2
   7   7   3 116.840 31.2464   1
  -8   7   6 243.777 36.0443  -2
   8   7   3 243.777 36.0443   1
  -9   7   6 51.9179 21.3687  -2
   9   7   3 51.9179 21.3687   1
   6   8   1 40.9016 13.1179  -2
  -6   8   3 40.9016 13.1179   1
   5   8   1 69.1670 17.7330  -2
  -5   8   3 69.1670 17.7330   1
   4   8   2 36.5984 19.1025  -2
  -4   8   3 36.5984 19.1025   1
   3   8   2 189.780 14.2804  -2
  -3   8   3 189.780 14.2804   1
   2   8   2 243.603 20.2758  -2
  -2   8   3 243.603 20.2758   1
   1   8   3 76.8843 17.3497  -2
  -1   8   3 76.8843 17.3497   1
   0   8   3 1017.48 47.2550  -2
   0   8   3 1017.48 47.2550   1
  -1   8   3 135.781 18.0935  -2
   1   8   3 135.781 18.0935   1
  -2   8   4 592.918 37.0800  -2
   2   8   3 592.918 37.0800   1
  -3   8   4 64.4373 12.5514  -2
   3   8   3 64.4373 12.5514   1
  -4   8   4 446.208 42.2349  -2
   4   8   3 446.208 42.2349   1
  -5   8   5 75.6611 27.4675  -2
   5   8   3 75.6611 27.4675   1
  -6   8   5 250.038 17.7544  -2
   6   8   3 250.038 17.7544   1
   4   9   2 69.4689 32.5393  -2
  -4   9   3 69.4689 32.5393   1
   3   9   2 228.802 24.7440  -2
  -3   9   3 228.802 24.7440   1
   2   9   2 168.492 29.5031  -2
  -2   9   3 168.492 29.5031   1
   1   9   3 124.117 21.6621  -2
  -1   9   3 124.117 21.6621   1
   0   9   3 119.869 14.5909  -2
   0   9   3 119.869 14.5909   1
  -1   9   3 131.975 24.1722  -2
   1   9   3 131.975 24.1722   1
  -2   9   4 171.305 34.6075  -2
   2   9   3 171.305 34.6075   1
  -3   9   4 65.6129 14.3932  -2
   3   9   3 65.6129 14.3932   1
  -4   9   4 47.2250 34.9560  -2
   4   9   3 47.2250 34.9560   1
 -15   0   1 75.8345 38.7368  -2
 -15   0   4 75.8345 38.7368   1
 -14   0   1 455.038 95.5234  -2
 -14   0   4 455.038 95.5234   1
  12   0   0 448.896 33.9773  -2
 -12   0   4 448.896 33.9773   1
  11   0   0 512.230 676.214  -2
 -11   0   4 512.230 676.214   1
  10   0   1 2032.37 635.104  -2
 -10   0   4 2032.37 635.104   1
   9   0   1 -48.430 18.1852  -2
  -9   0   4 -48.430 18.1852   1
   8   0   1 1989.44 110.884  -2
  -8   0   4 1989.44 110.884   1
   7   0   2 -134.42 7.43270  -2
  -7   0   4 -134.42 7.43270   1
   6   0   2 2158.70 103.840  -2
  -6   0   4 2158.70 103.840   1
   5   0   2 91.9318 7.13081  -2
  -5   0   4 91.9318 7.13081   1
   4   0   3 4455.81 180.062  -2
  -4   0   4 4455.81 180.062   1
   3   0   3 15.0460 57.0887  -2
  -3   0   4 15.0460 57.0887   1
   2   0   3 2035.97 92.8565  -2
  -2   0   4 2035.97 92.8565   1
   0   0   4 3366.20 130.800  -2
   0   0   4 3366.20 130.800   1
  -1   0   4 -15.199 6.47252  -2
   1   0   4 -15.199 6.47252   1
  -2   0   5 2566.53 94.0242  -2
   2   0   4 2566.53 94.0242   1
  -3   0   5 56.3055 57.7224  -2
   3   0   4 56.3055 57.7224   1
  -4   0   5 1993.22 74.3431  -2
   4   0   4 1993.22 74.3431   1
  -5   0   6 -12.720 9.24085  -2
   5   0   4 -12.720 9.24085   1
  -6   0   6 245.985 11.9443  -2
   6   0   4 245.985 11.9443   1
  -7   0   6 232.422 325.313  -2
   7   0   4 232.422 325.313   1
  -8   0   7 49.9030 47.0876  -2
   8   0   4 49.9030 47.0876   1
  -9   0   7 -89.434 14.5248  -2
   9   0   4 -89.434 14.5248   1
 -10   0   7 -9.2695 30.3654  -2
  10   0   4 -9.2695 30.3654   1
 -11   0   8 -9.0631 58.2533  -2
  11   0   4 -9.0631 58.2533   1
 -12   0   8 146.412 31.7513  -2
  12   0   4 146.412 31.7513   1
 -15   1   1 54.5392 38.5010  -2
 -15   1   4 54.5392 38.5010   1
 -14   1   1 277.116 60.2729  -2
 -14   1   4 277.116 60.2729   1
  12   1   0 201.956 26.8535  -2
 -12   1   4 201.956 26.8535   1
  11   1   0 306.249 27.3991  -2
 -11   1   4 306.249 27.3991   1
  10   1   1 1361.25 80.9530  -2
 -10   1   4 1361.25 80.9530   1
   9   1   1 478.987 19.9063  -2
  -9   1   4 478.987 19.9063   1
   8   1   1 868.577 35.5621  -2
  -8   1   4 868.577 35.5621   1
   7   1   2 267.674 15.2571  -2
  -7   1   4 267.674 15.2571   1
   6   1   2 693.437 26.2840  -2
  -6   1   4 693.437 26.2840   1
   5   1   2 403.083 17.7106  -2
  -5   1   4 403.083 17.7106   1
   4   1   3 162.055 5.99938  -2
  -4   1   4 162.055 5.99938   1
   3   1   3 345.027 10.8282  -2
  -3   1   4 345.027 10.8282   1
   2   1   3 351.841 12.6663  -2
  -2   1   4 351.841 12.6663   1
   1   1   4 83.1093 5.24350  -2
  -1   1   4 83.1093 5.24350   1
   0   1   4 -44.430 50.2681  -2
   0   1   4 -44.430 50.2681   1
  -1   1   4 154.125 6.54799  -2
   1   1   4 154.125 6.54799   1
  -2   1   5 842.688 29.0338  -2
   2   1   4 842.688 29.0338   1
  -3   1   5 410.494 12.3419  -2
   3   1   4 410.494 12.3419   1
  -4   1   5 1333.52 39.6755  -2
   4   1   4 1333.52 39.6755   1
  -5   1   6 389.191 14.5100  -2
   5   1   4 389.191 14.5100   1
  -6   1   6 755.483 25.4774  -2
   6   1   4 755.483 25.4774   1
  -7   1   6 388.315 17.4935  -2
   7   1   4 388.315 17.4935   1
  -8   1   7 693.709 25.6382  -2
   8   1   4 693.709 25.6382   1
  -9   1   7 90.3314 10.5626  -2
   9   1   4 90.3314 10.5626   1
 -10   1   7 399.245 34.5936  -2
  10   1   4 399.245 34.5936   1
 -11   1   8 26.3195 28.2187  -2
  11   1   4 26.3195 28.2187   1
 -12   1   8 188.206 27.1962  -2
  12   1   4 188.206 27.1962   1
  14   1   4 229.508 33.6886   1
 -14   2   1 243.721 58.0989  -2
 -14   2   4 243.721 58.0989   1
  12   2   0 139.957 12.8276  -2
 -12   2   4 139.957 12.8276   1
  11   2   0 385.180 28.2862  -2
 -11   2   4 385.180 28.2862   1
  10   2   1 137.703 20.7945  -2
 -10   2   4 137.703 20.7945   1
   9   2   1 1059.86 37.6434  -2
  -9   2   4 1059.86 37.6434   1
   8   2   1 372.546 26.9489  -2
  -8   2   4 372.546 26.9489   1
   7   2   2 1396.79 81.2800  -2
  -7   2   4 1396.79 81.2800   1
   6   2   2 650.572 22.0234  -2
  -6   2   4 650.572 22.0234   1
   5   2   2 1335.25 42.8951  -2
  -5   2   4 1335.25 42.8951   1
   4   2   3 794.072 36.0979  -2
  -4   2   4 794.072 36.0979   1
   3   2   3 1673.28 48.0891  -2
  -3   2   4 1673.28 48.0891   1
   2   2   3 788.266 30.5886  -2
  -2   2   4 788.266 30.5886   1
   1   2   4 404.790 15.1994  -2
  -1   2   4 404.790 15.1994   1
   0   2   4 810.820 26.8839  -2
   0   2   4 810.820 26.8839   1
  -1   2   4 544.992 20.7747  -2
   1   2   4 544.992 20.7747   1
  -2   2   5 903.950 29.9716  -2
   2   2   4 903.950 29.9716   1
  -3   2   5 1225.82 38.3297  -2
   3   2   4 1225.82 38.3297   1
  -4   2   5 672.570 21.1198  -2
   4   2   4 672.570 21.1198   1
  -5   2   6 1019.85 31.4908  -2
   5   2   4 1019.85 31.4908   1
  -6   2   6 117.001 6.85736  -2
   6   2   4 117.001 6.85736   1
  -7   2   6 169.557 12.1463  -2
   7   2   4 169.557 12.1463   1
  -8   2   7 993.973 342.538  -2
   8   2   4 993.973 342.538   1
  -9   2   7 132.776 39.9949  -2
   9   2   4 132.776 39.9949   1
 -10   2   7 183.194 17.0380  -2
  10   2   4 183.194 17.0380   1
 -11   2   8 161.246 21.5460  -2
  11   2   4 161.246 21.5460   1
 -12   2   8 47.5379 14.6378  -2
  12   2   4 47.5379 14.6378   1
  12   3   0 102.701 15.3182  -2
 -12   3   4 102.701 15.3182   1
  11   3   0 944.474 48.9132  -2
 -11   3   4 944.474 48.9132   1
  10   3   1 26.9335 417.912  -2
 -10   3   4 26.9335 417.912   1
   9   3   1 740.996 29.6113  -2
  -9   3   4 740.996 29.6113   1
   8   3   1 -212.82 353.962  -2
  -8   3   4 -212.82 353.962   1
   7   3   2 994.251 61.9211  -2
  -7   3   4 994.251 61.9211   1
   6   3   2 267.400 11.7302  -2
  -6   3   4 267.400 11.7302   1
   5   3   2 413.807 25.5541  -2
  -5   3   4 413.807 25.5541   1
   4   3   3 295.215 13.3510  -2
  -4   3   4 295.215 13.3510   1
   3   3   3 392.885 13.6111  -2
  -3   3   4 392.885 13.6111   1
   2   3   3 210.251 7.49741  -2
  -2   3   4 210.251 7.49741   1
   1   3   4 430.329 16.8454  -2
  -1   3   4 430.329 16.8454   1
   0   3   4 190.915 8.47629  -2
   0   3   4 190.915 8.47629   1
  -1   3   4 191.263 12.8392  -2
   1   3   4 191.263 12.8392   1
  -2   3   5 915.702 30.6277  -2
   2   3   4 915.702 30.6277   1
  -3   3   5 759.398 24.7186  -2
   3   3   4 759.398 24.7186   1
  -4   3   5 407.916 16.8099  -2
   4   3   4 407.916 16.8099   1
  -5   3   6 797.668 32.4531  -2
   5   3   4 797.668 32.4531   1
  -6   3   6 200.277 10.6541  -2
   6   3   4 200.277 10.6541   1
  -7   3   6 120.990 216.555  -2
   7   3   4 120.990 216.555   1
  -8   3   7 665.411 344.480  -2
   8   3   4 665.411 344.480   1
  -9   3   7 180.382 14.7753  -2
   9   3   4 180.382 14.7753   1
 -10   3   7 1113.40 591.862  -2
  10   3   4 1113.40 591.862   1
 -11   3   8 291.161 28.9085  -2
  11   3   4 291.161 28.9085   1
 -12   3   8 98.4185 19.7733  -2
  12   3   4 98.4185 19.7733   1
  13   4   0 97.8067 33.0603  -2
 -13   4   4 97.8067 33.0603   1
  12   4   0 106.443 18.2859  -2
 -12   4   4 106.443 18.2859   1
  11   4   0 546.888 35.1922  -2
 -11   4   4 546.888 35.1922   1
  10   4   1 -307.52 771.213  -2
 -10   4   4 -307.52 771.213   1
   9   4   1 567.607 20.7318  -2
  -9   4   4 567.607 20.7318   1
   8   4   1 318.264 30.7293  -2
  -8   4   4 318.264 30.7293   1
   7   4   2 689.049 56.8680  -2
  -7   4   4 689.049 56.8680   1
   6   4   2 337.680 14.2710  -2
  -6   4   4 337.680 14.2710   1
   5   4   2 987.325 39.8416  -2
  -5   4   4 987.325 39.8416   1
   4   4   3 548.712 28.1918  -2
  -4   4   4 548.712 28.1918   1
   3   4   3 1563.24 48.4664  -2
  -3   4   4 1563.24 48.4664   1
   2   4   3 555.474 20.1524  -2
  -2   4   4 555.474 20.1524   1
   1   4   4 1715.70 57.2373  -2
  -1   4   4 1715.70 57.2373   1
   0   4   4 -3.4423 3.31864  -2
   0   4   4 -3.4423 3.31864   1
  -1   4   4 1431.55 46.7500  -2
   1   4   4 1431.55 46.7500   1
  -2   4   5 325.503 11.3288  -2
   2   4   4 325.503 11.3288   1
  -3   4   5 767.909 25.8385  -2
   3   4   4 767.909 25.8385   1
  -4   4   5 338.615 20.2590  -2
   4   4   4 338.615 20.2590   1
  -5   4   6 491.783 19.2887  -2
   5   4   4 491.783 19.2887   1
  -6   4   6 368.562 13.6644  -2
   6   4   4 368.562 13.6644   1
  -7   4   6 156.113 15.4509  -2
   7   4   4 156.113 15.4509   1
  -8   4   7 154.272 16.4871  -2
   8   4   4 154.272 16.4871   1
  -9   4   7 81.6134 10.8170  -2
   9   4   4 81.6134 10.8170   1
 -10   4   7 49.0003 55.5562  -2
  10   4   4 49.0003 55.5562   1
 -11   4   8 140.188 29.6926  -2
  11   4   4 140.188 29.6926   1
 -12   4   8 -9.6935 27.9723  -2
  12   4   4 -9.6935 27.9723   1
  12   5   0 97.9901 16.6711  -2
 -12   5   4 97.9901 16.6711   1
  11   5   0 189.055 28.9224  -2
 -11   5   4 189.055 28.9224   1
  10   5   1 1817.68 948.126  -2
 -10   5   4 1817.68 948.126   1
   9   5   1 199.484 12.6889  -2
  -9   5   4 199.484 12.6889   1
   8   5   1 193.540 25.0163  -2
  -8   5   4 193.540 25.0163   1
   7   5   2 136.629 17.1092  -2
  -7   5   4 136.629 17.1092   1
   6   5   2 261.382 13.1655  -2
  -6   5   4 261.382 13.1655   1
   5   5   2 480.604 25.2878  -2
  -5   5   4 480.604 25.2878   1
   4   5   3 -98.143 11.1511  -2
  -4   5   4 -98.143 11.1511   1
   3   5   3 246.986 11.4803  -2
  -3   5   4 246.986 11.4803   1
   2   5   3 -41.321 24.2001  -2
  -2   5   4 -41.321 24.2001   1
   1   5   4 739.641 32.2393  -2
  -1   5   4 739.641 32.2393   1
   0   5   4 241.634 12.0915  -2
   0   5   4 241.634 12.0915   1
  -1   5   4 459.345 38.0234  -2
   1   5   4 459.345 38.0234   1
  -2   5   5 362.799 24.3198  -2
   2   5   4 362.799 24.3198   1
  -3   5   5 471.093 28.0415  -2
   3   5   4 471.093 28.0415   1
  -4   5   5 697.326 43.8106  -2
   4   5   4 697.326 43.8106   1
  -5   5   6 273.336 22.5881  -2
   5   5   4 273.336 22.5881   1
  -6   5   6 251.556 17.2921  -2
   6   5   4 251.556 17.2921   1
  -7   5   6 506.861 39.3048  -2
   7   5   4 506.861 39.3048   1
  -8   5   7 82.3014 34.9550  -2
   8   5   4 82.3014 34.9550   1
  -9   5   7 200.719 23.7300  -2
   9   5   4 200.719 23.7300   1
 -10   5   7 229.249 72.1266  -2
  10   5   4 229.249 72.1266   1
 -11   5   8 338.370 61.8431  -2
  11   5   4 338.370 61.8431   1
  11   6   0 195.680 45.1104  -2
 -11   6   4 195.680 45.1104   1
  10   6   1 158.857 33.4380  -2
 -10   6   4 158.857 33.4380   1
   9   6   1 57.4706 12.4789  -2
  -9   6   4 57.4706 12.4789   1
   8   6   1 184.995 38.9299  -2
  -8   6   4 184.995 38.9299   1
   7   6   2 86.0501 21.5831  -2
  -7   6   4 86.0501 21.5831   1
   6   6   2 386.456 19.4467  -2
  -6   6   4 386.456 19.4467   1
   5   6   2 -513.59 421.992  -2
  -5   6   4 -513.59 421.992   1
   4   6   3 1007.01 59.9999  -2
  -4   6   4 1007.01 59.9999   1
   3   6   3 1071.42 40.6653  -2
  -3   6   4 1071.42 40.6653   1
   2   6   3 1167.08 45.8716  -2
  -2   6   4 1167.08 45.8716   1
   1   6   4 617.099 30.7780  -2
  -1   6   4 617.099 30.7780   1
   0   6   4 370.725 16.0603  -2
   0   6   4 370.725 16.0603   1
  -1   6   4 438.077 25.6697  -2
   1   6   4 438.077 25.6697   1
  -2   6   5 237.097 27.3022  -2
   2   6   4 237.097 27.3022   1
  -3   6   5 129.369 11.9812  -2
   3   6   4 129.369 11.9812   1
  -4   6   5 177.429 20.7102  -2
   4   6   4 177.429 20.7102   1
  -5   6   6 227.701 20.4835  -2
   5   6   4 227.701 20.4835   1
  -6   6   6 88.2609 12.3547  -2
   6   6   4 88.2609 12.3547   1
  -7   6   6 370.825 28.6868  -2
   7   6   4 370.825 28.6868   1
  -8   6   7 59.6668 22.7179  -2
   8   6   4 59.6668 22.7179   1
  -9   6   7 272.333 25.7575  -2
   9   6   4 272.333 25.7575   1
   9   7   1 19.5448 25.2841  -2
  -9   7   4 19.5448 25.2841   1
   8   7   1 249.168 29.9934  -2
  -8   7   4 249.168 29.9934   1
   7   7   2 29.9384 25.3638  -2
  -7   7   4 29.9384 25.3638   1
   6   7   2 286.940 18.2634  -2
  -6   7   4 286.940 18.2634   1
   5   7   2 94.6133 15.9005  -2
  -5   7   4 94.6133 15.9005   1
   4   7   3 117.893 17.8291  -2
  -4   7   4 117.893 17.8291   1
   3   7   3 94.8781 9.56594  -2
  -3   7   4 94.8781 9.56594   1
   2   7   3 92.9852 14.0613  -2
  -2   7   4 92.9852 14.0613   1
   1   7   4 148.150 19.6744  -2
  -1   7   4 148.150 19.6744   1
   0   7   4 154.462 11.8379  -2
   0   7   4 154.462 11.8379   1
  -1   7   4 264.351 20.0396  -2
   1   7   4 264.351 20.0396   1
  -2   7   5 460.979 25.0595  -2
   2   7   4 460.979 25.0595   1
  -3   7   5 251.787 14.1382  -2
   3   7   4 251.787 14.1382   1
  -4   7   5 290.316 19.7260  -2
   4   7   4 290.316 19.7260   1
  -5   7   6 338.008 22.4904  -2
   5   7   4 338.008 22.4904   1
  -6   7   6 149.295 21.4601  -2
   6   7   4 149.295 21.4601   1
  -7   7   6 151.092 26.2628  -2
   7   7   4 151.092 26.2628   1
  -8   7   7 183.517 43.2465  -2
   8   7   4 183.517 43.2465   1
  -9   7   7 174.028 28.0973  -2
   9   7   4 174.028 28.0973   1
   7   8   2 81.9263 53.9481  -2
  -7   8   4 81.9263 53.9481   1
   6   8   2 149.259 16.5895  -2
  -6   8   4 149.259 16.5895   1
   5   8   2 95.0508 18.0481  -2
  -5   8   4 95.0508 18.0481   1
   4   8   3 448.022 33.4411  -2
  -4   8   4 448.022 33.4411   1
   3   8   3 153.035 13.4949  -2
  -3   8   4 153.035 13.4949   1
   2   8   3 587.281 35.8814  -2
  -2   8   4 587.281 35.8814   1
   1   8   4 112.792 19.1527  -2
  -1   8   4 112.792 19.1527   1
   0   8   4 507.321 30.6265  -2
   0   8   4 507.321 30.6265   1
  -1   8   4 51.2949 19.8908  -2
   1   8   4 51.2949 19.8908   1
  -2   8   5 294.923 27.3771  -2
   2   8   4 294.923 27.3771   1
  -3   8   5 59.2494 11.1779  -2
   3   8   4 59.2494 11.1779   1
  -4   8   5 280.410 31.1743  -2
   4   8   4 280.410 31.1743   1
  -5   8   6 96.2521 22.8346  -2
   5   8   4 96.2521 22.8346   1
  -6   8   6 207.870 25.2876  -2
   6   8   4 207.870 25.2876   1
   4   9   3 -17.701 22.8820  -2
  -4   9   4 -17.701 22.8820   1
   3   9   3 102.786 14.3859  -2
  -3   9   4 102.786 14.3859   1
   2   9   3 92.1316 32.1371  -2
  -2   9   4 92.1316 32.1371   1
   1   9   4 157.847 35.2200  -2
  -1   9   4 157.847 35.2200   1
   0   9   4 195.547 18.0503  -2
   0   9   4 195.547 18.0503   1
  -1   9   4 62.5241 31.1286  -2
   1   9   4 62.5241 31.1286   1
  -2   9   5 101.825 32.0200  -2
   2   9   4 101.825 32.0200   1
  -3   9   5 87.1850 14.3143  -2
   3   9   4 87.1850 14.3143   1
  15   0   0 -15.946 50.0242  -2
 -15   0   5 -15.946 50.0242   1
  14   0   0 477.823 58.4165  -2
 -14   0   5 477.823 58.4165   1
  12   0   1 757.599 43.7764  -2
 -12   0   5 757.599 43.7764   1
  11   0   1 289.994 655.603  -2
 -11   0   5 289.994 655.603   1
  10   0   2 1944.52 615.752  -2
 -10   0   5 1944.52 615.752   1
   9   0   2 5.95562 23.0586  -2
  -9   0   5 5.95562 23.0586   1
   8   0   2 1149.75 65.0458  -2
  -8   0   5 1149.75 65.0458   1
   7   0   3 -118.72 11.2010  -2
  -7   0   5 -118.72 11.2010   1
   6   0   3 498.780 21.1591  -2
  -6   0   5 498.780 21.1591   1
   5   0   3 -36.492 8.13317  -2
  -5   0   5 -36.492 8.13317   1
   4   0   4 2022.07 95.6677  -2
  -4   0   5 2022.07 95.6677   1
   3   0   4 77.1217 128.486  -2
  -3   0   5 77.1217 128.486   1
   2   0   4 3396.67 154.476  -2
  -2   0   5 3396.67 154.476   1
   1   0   5 -1.3642 9.74439  -2
  -1   0   5 -1.3642 9.74439   1
   0   0   5 8290.08 313.981  -2
   0   0   5 8290.08 313.981   1
  -1   0   5 -44.905 9.25293  -2
   1   0   5 -44.905 9.25293   1
  -2   0   6 1372.76 52.8757  -2
   2   0   5 1372.76 52.8757   1
  -3   0   6 36.4927 4.16297  -2
   3   0   5 36.4927 4.16297   1
  -4   0   6 1045.61 49.6563  -2
   4   0   5 1045.61 49.6563   1
  -5   0   7 -153.44 221.615  -2
   5   0   5 -153.44 221.615   1
  -6   0   7 72.0109 8.67263  -2
   6   0   5 72.0109 8.67263   1
  -7   0   7 209.556 364.346  -2
   7   0   5 209.556 364.346   1
  -8   0   8 -189.43 46.7146  -2
   8   0   5 -189.43 46.7146   1
  -9   0   8 145.120 34.6178  -2
   9   0   5 145.120 34.6178   1
 -10   0   8 -213.38 37.8773  -2
  10   0   5 -213.38 37.8773   1
 -12   0   9 198.776 34.9597  -2
  12   0   5 198.776 34.9597   1
  15   1   0 18.5136 46.1937  -2
 -15   1   5 18.5136 46.1937   1
  14   1   0 279.520 61.5834  -2
 -14   1   5 279.520 61.5834   1
  12   1   1 234.024 18.7708  -2
 -12   1   5 234.024 18.7708   1
  11   1   1 123.363 16.3191  -2
 -11   1   5 123.363 16.3191   1
  10   1   2 635.912 23.9089  -2
 -10   1   5 635.912 23.9089   1
   9   1   2 433.209 17.9364  -2
  -9   1   5 433.209 17.9364   1
   8   1   2 949.612 36.3432  -2
  -8   1   5 949.612 36.3432   1
   7   1   3 216.227 12.8524  -2
  -7   1   5 216.227 12.8524   1
   6   1   3 687.862 21.8105  -2
  -6   1   5 687.862 21.8105   1
   5   1   3 274.697 7.49004  -2
  -5   1   5 274.697 7.49004   1
   4   1   4 1112.39 32.7382  -2
  -4   1   5 1112.39 32.7382   1
   3   1   4 396.601 12.4286  -2
  -3   1   5 396.601 12.4286   1
   2   1   4 558.848 17.4533  -2
  -2   1   5 558.848 17.4533   1
   1   1   5 157.288 6.56265  -2
  -1   1   5 157.288 6.56265   1
   0   1   5 1177.99 37.9573  -2
   0   1   5 1177.99 37.9573   1
  -1   1   5 272.451 8.39727  -2
   1   1   5 272.451 8.39727   1
  -2   1   6 1752.87 52.3989  -2
   2   1   5 1752.87 52.3989   1
  -3   1   6 962.436 30.8172  -2
   3   1   5 962.436 30.8172   1
  -4   1   6 1398.82 41.7081  -2
   4   1   5 1398.82 41.7081   1
  -5   1   7 156.291 9.53563  -2
   5   1   5 156.291 9.53563   1
  -6   1   7 644.044 20.5973  -2
   6   1   5 644.044 20.5973   1
  -7   1   7 -113.22 11.6738  -2
   7   1   5 -113.22 11.6738   1
  -8   1   8 343.654 15.0524  -2
   8   1   5 343.654 15.0524   1
  -9   1   8 41.5623 11.2399  -2
   9   1   5 41.5623 11.2399   1
 -10   1   8 218.642 24.7176  -2
  10   1   5 218.642 24.7176   1
 -11   1   9 11.3999 41.7295  -2
  11   1   5 11.3999 41.7295   1
 -12   1   9 198.902 24.7845  -2
  12   1   5 198.902 24.7845   1
  14   2   0 174.911 58.8413  -2
 -14   2   5 174.911 58.8413   1
  12   2   1 111.493 13.0356  -2
 -12   2   5 111.493 13.0356   1
  11   2   1 852.957 38.2674  -2
 -11   2   5 852.957 38.2674   1
  10   2   2 293.325 38.5468  -2
 -10   2   5 293.325 38.5468   1
   9   2   2 634.006 38.3186  -2
  -9   2   5 634.006 38.3186   1
   8   2   2 483.380 25.2515  -2
  -8   2   5 483.380 25.2515   1
   7   2   3 463.098 34.9317  -2
  -7   2   5 463.098 34.9317   1
   6   2   3 816.717 34.8466  -2
  -6   2   5 816.717 34.8466   1
   5   2   3 970.869 35.1629  -2
  -5   2   5 970.869 35.1629   1
   4   2   4 830.835 25.7731  -2
  -4   2   5 830.835 25.7731   1
   3   2   4 1224.73 41.1381  -2
  -3   2   5 1224.73 41.1381   1
   2   2   4 1013.96 33.8514  -2
  -2   2   5 1013.96 33.8514   1
   1   2   5 2171.24 60.3758  -2
  -1   2   5 2171.24 60.3758   1
   0   2   5 117.457 6.36212  -2
   0   2   5 117.457 6.36212   1
  -1   2   5 2158.53 74.8005  -2
   1   2   5 2158.53 74.8005   1
  -2   2   6 336.619 13.2277  -2
   2   2   5 336.619 13.2277   1
  -3   2   6 1261.81 42.9800  -2
   3   2   5 1261.81 42.9800   1
  -4   2   6 151.828 9.81644  -2
   4   2   5 151.828 9.81644   1
  -5   2   7 495.200 18.5716  -2
   5   2   5 495.200 18.5716   1
  -6   2   7 68.0000 5.72334  -2
   6   2   5 68.0000 5.72334   1
  -7   2   7 146.200 16.3480  -2
   7   2   5 146.200 16.3480   1
  -8   2   8 153.439 12.1319  -2
   8   2   5 153.439 12.1319   1
  -9   2   8 24.3060 8.90415  -2
   9   2   5 24.3060 8.90415   1
 -10   2   8 73.7171 19.1878  -2
  10   2   5 73.7171 19.1878   1
 -11   2   9 288.108 27.6236  -2
  11   2   5 288.108 27.6236   1
 -12   2   9 75.4207 16.1104  -2
  12   2   5 75.4207 16.1104   1
  14   3   0 169.755 84.7332  -2
 -14   3   5 169.755 84.7332   1
  12   3   1 93.6791 17.5517  -2
 -12   3   5 93.6791 17.5517   1
  11   3   1 710.426 63.6069  -2
 -11   3   5 710.426 63.6069   1
  10   3   2 -186.82 519.623  -2
 -10   3   5 -186.82 519.623   1
   9   3   2 433.436 22.0617  -2
  -9   3   5 433.436 22.0617   1
   8   3   2 -12.956 18.0959  -2
  -8   3   5 -12.956 18.0959   1
   7   3   3 656.879 47.5063  -2
  -7   3   5 656.879 47.5063   1
   6   3   3 123.673 7.25700  -2
  -6   3   5 123.673 7.25700   1
   5   3   3 348.562 15.2655  -2
  -5   3   5 348.562 15.2655   1
   4   3   4 422.829 15.8124  -2
  -4   3   5 422.829 15.8124   1
   3   3   4 692.985 28.5540  -2
  -3   3   5 692.985 28.5540   1
   2   3   4 867.163 32.8556  -2
  -2   3   5 867.163 32.8556   1
   1   3   5 955.251 43.4009  -2
  -1   3   5 955.251 43.4009   1
   0   3   5 161.490 9.01867  -2
   0   3   5 161.490 9.01867   1
  -1   3   5 1163.68 38.4377  -2
   1   3   5 1163.68 38.4377   1
  -2   3   6 240.279 9.62338  -2
   2   3   5 240.279 9.62338   1
  -3   3   6 1010.31 32.8060  -2
   3   3   5 1010.31 32.8060   1
  -4   3   6 293.721 11.8314  -2
   4   3   5 293.721 11.8314   1
  -5   3   7 998.139 40.2399  -2
   5   3   5 998.139 40.2399   1
  -6   3   7 321.383 15.1837  -2
   6   3   5 321.383 15.1837   1
  -7   3   7 235.208 19.4912  -2
   7   3   5 235.208 19.4912   1
  -8   3   8 340.519 17.0734  -2
   8   3   5 340.519 17.0734   1
  -9   3   8 230.831 10.5024  -2
   9   3   5 230.831 10.5024   1
 -10   3   8 1914.24 700.393  -2
  10   3   5 1914.24 700.393   1
 -11   3   9 270.735 27.9103  -2
  11   3   5 270.735 27.9103   1
 -12   3   9 79.1449 20.1115  -2
  12   3   5 79.1449 20.1115   1
  13   4   1 143.308 35.6868  -2
 -13   4   5 143.308 35.6868   1
  12   4   1 81.4535 22.1060  -2
 -12   4   5 81.4535 22.1060   1
  11   4   1 343.030 36.7204  -2
 -11   4   5 343.030 36.7204   1
  10   4   2 -331.83 580.277  -2
 -10   4   5 -331.83 580.277   1
   9   4   2 319.126 18.8583  -2
  -9   4   5 319.126 18.8583   1
   8   4   2 50.2208 18.4410  -2
  -8   4   5 50.2208 18.4410   1
   7   4   3 48.0464 186.992  -2
  -7   4   5 48.0464 186.992   1
   6   4   3 199.642 16.6355  -2
  -6   4   5 199.642 16.6355   1
   5   4   3 1056.31 45.5652  -2
  -5   4   5 1056.31 45.5652   1
   4   4   4 261.804 15.9544  -2
  -4   4   5 261.804 15.9544   1
   3   4   4 926.841 32.0113  -2
  -3   4   5 926.841 32.0113   1
   2   4   4 452.313 17.1428  -2
  -2   4   5 452.313 17.1428   1
   1   4   5 678.209 26.6815  -2
  -1   4   5 678.209 26.6815   1
   0   4   5 456.114 15.2978  -2
   0   4   5 456.114 15.2978   1
  -1   4   5 483.262 19.0946  -2
   1   4   5 483.262 19.0946   1
  -2   4   6 517.560 21.9358  -2
   2   4   5 517.560 21.9358   1
  -3   4   6 186.082 10.0174  -2
   3   4   5 186.082 10.0174   1
  -4   4   6 324.500 18.5241  -2
   4   4   5 324.500 18.5241   1
  -5   4   7 323.689 14.5174  -2
   5   4   5 323.689 14.5174   1
  -6   4   7 35.6847 10.7581  -2
   6   4   5 35.6847 10.7581   1
  -7   4   7 4.76625 37.3459  -2
   7   4   5 4.76625 37.3459   1
  -8   4   8 -63.028 17.8560  -2
   8   4   5 -63.028 17.8560   1
  -9   4   8 178.512 15.1105  -2
   9   4   5 178.512 15.1105   1
 -10   4   8 65.0555 35.7689  -2
  10   4   5 65.0555 35.7689   1
 -11   4   9 261.841 30.3773  -2
  11   4   5 261.841 30.3773   1
 -12   4   9 26.6225 29.7440  -2
  12   4   5 26.6225 29.7440   1
  12   5   1 97.2509 22.8820  -2
 -12   5   5 97.2509 22.8820   1
  11   5   1 106.006 27.2023  -2
 -11   5   5 106.006 27.2023   1
  10   5   2 607.924 66.1840  -2
 -10   5   5 607.924 66.1840   1
   9   5   2 120.996 10.4207  -2
  -9   5   5 120.996 10.4207   1
   8   5   2 386.702 28.9531  -2
  -8   5   5 386.702 28.9531   1
   7   5   3 415.151 255.234  -2
  -7   5   5 415.151 255.234   1
   6   5   3 193.631 12.3149  -2
  -6   5   5 193.631 12.3149   1
   5   5   3 -281.89 381.297  -2
  -5   5   5 -281.89 381.297   1
   4   5   4 356.123 35.6239  -2
  -4   5   5 356.123 35.6239   1
   3   5   4 666.370 21.8011  -2
  -3   5   5 666.370 21.8011   1
   2   5   4 394.997 20.1058  -2
  -2   5   5 394.997 20.1058   1
   1   5   5 518.182 35.3088  -2
  -1   5   5 518.182 35.3088   1
   0   5   5 193.301 9.88361  -2
   0   5   5 193.301 9.88361   1
  -1   5   5 367.835 18.4733  -2
   1   5   5 367.835 18.4733   1
  -2   5   6 381.102 24.0766  -2
   2   5   5 381.102 24.0766   1
  -3   5   6 355.510 19.6159  -2
   3   5   5 355.510 19.6159   1
  -4   5   6 571.658 27.7549  -2
   4   5   5 571.658 27.7549   1
  -5   5   7 392.213 21.8826  -2
   5   5   5 392.213 21.8826   1
  -6   5   7 146.716 13.0740  -2
   6   5   5 146.716 13.0740   1
  -7   5   7 740.241 53.9384  -2
   7   5   5 740.241 53.9384   1
  -8   5   8 100.665 31.0197  -2
   8   5   5 100.665 31.0197   1
  -9   5   8 373.291 25.8763  -2
   9   5   5 373.291 25.8763   1
  11   6   1 371.060 93.8870  -2
 -11   6   5 371.060 93.8870   1
  10   6   2 453.090 85.5239  -2
 -10   6   5 453.090 85.5239   1
   9   6   2 76.8630 14.2266  -2
  -9   6   5 76.8630 14.2266   1
   8   6   2 383.727 33.9069  -2
  -8   6   5 383.727 33.9069   1
   7   6   3 278.453 18.6252  -2
  -7   6   5 278.453 18.6252   1
   6   6   3 407.175 20.0982  -2
  -6   6   5 407.175 20.0982   1
   5   6   3 335.166 25.3254  -2
  -5   6   5 335.166 25.3254   1
   4   6   4 1061.18 503.096  -2
  -4   6   5 1061.18 503.096   1
   3   6   4 176.101 10.4133  -2
  -3   6   5 176.101 10.4133   1
   2   6   4 599.692 26.5725  -2
  -2   6   5 599.692 26.5725   1
   1   6   5 233.208 20.4682  -2
  -1   6   5 233.208 20.4682   1
   0   6   5 399.467 23.4864  -2
   0   6   5 399.467 23.4864   1
  -1   6   5 472.474 154.415  -2
   1   6   5 472.474 154.415   1
  -1   6   5 86.3202 39.7601  -2
  -1   6   6 86.3202 39.7601  -2
   1   6   5 86.3202 39.7601   1
  -2   6   6 303.274 20.0363  -2
   2   6   5 303.274 20.0363   1
  -3   6   6 130.058 12.3262  -2
   3   6   5 130.058 12.3262   1
  -4   6   6 274.484 19.6056  -2
   4   6   5 274.484 19.6056   1
  -5   6   7 194.400 31.1066  -2
   5   6   5 194.400 31.1066   1
  -6   6   7 116.558 13.6635  -2
   6   6   5 116.558 13.6635   1
  -7   6   7 298.239 63.8910  -2
   7   6   5 298.239 63.8910   1
  -8   6   8 177.526 37.5342  -2
   8   6   5 177.526 37.5342   1
  -9   6   8 205.605 33.6520  -2
   9   6   5 205.605 33.6520   1
 -10   7   5 79.8353 78.8828   1
   9   7   2 91.6724 22.4457  -2
  -9   7   5 91.6724 22.4457   1
   8   7   2 76.8747 29.8235  -2
  -8   7   5 76.8747 29.8235   1
   7   7   3 78.5127 26.6379  -2
  -7   7   5 78.5127 26.6379   1
   6   7   3 193.878 14.6957  -2
  -6   7   5 193.878 14.6957   1
   5   7   3 102.045 15.6939  -2
  -5   7   5 102.045 15.6939   1
   4   7   4 336.785 26.0456  -2
  -4   7   5 336.785 26.0456   1
   3   7   4 111.617 10.1696  -2
  -3   7   5 111.617 10.1696   1
   2   7   4 555.693 29.8339  -2
  -2   7   5 555.693 29.8339   1
   1   7   5 42.1609 15.0898  -2
  -1   7   5 42.1609 15.0898   1
   0   7   5 388.083 17.9186  -2
   0   7   5 388.083 17.9186   1
  -1   7   5 68.3511 14.5377  -2
   1   7   5 68.3511 14.5377   1
  -2   7   6 184.348 23.8687  -2
   2   7   5 184.348 23.8687   1
  -3   7   6 88.7357 8.71863  -2
   3   7   5 88.7357 8.71863   1
  -4   7   6 270.461 21.7102  -2
   4   7   5 270.461 21.7102   1
  -5   7   7 241.845 31.7572  -2
   5   7   5 241.845 31.7572   1
  -6   7   7 470.182 30.1948  -2
   6   7   5 470.182 30.1948   1
  -7   7   7 275.034 78.5830  -2
   7   7   5 275.034 78.5830   1
  -8   7   8 370.944 58.9020  -2
   8   7   5 370.944 58.9020   1
   7   8   3 174.558 58.4576  -2
  -7   8   5 174.558 58.4576   1
   6   8   3 265.917 18.8813  -2
  -6   8   5 265.917 18.8813   1
   5   8   3 125.231 18.2941  -2
  -5   8   5 125.231 18.2941   1
   4   8   4 217.337 24.3395  -2
  -4   8   5 217.337 24.3395   1
   3   8   4 131.440 12.2690  -2
  -3   8   5 131.440 12.2690   1
   2   8   4 186.796 21.8590  -2
  -2   8   5 186.796 21.8590   1
   1   8   5 87.6820 20.2846  -2
  -1   8   5 87.6820 20.2846   1
   0   8   5 20.9028 8.74364  -2
   0   8   5 20.9028 8.74364   1
  -1   8   5 106.247 21.2628  -2
   1   8   5 106.247 21.2628   1
  -2   8   6 118.416 18.9062  -2
   2   8   5 118.416 18.9062   1
  -3   8   6 134.869 13.0095  -2
   3   8   5 134.869 13.0095   1
  -4   8   6 190.464 31.7458  -2
   4   8   5 190.464 31.7458   1
  -5   8   7 229.393 30.7036  -2
   5   8   5 229.393 30.7036   1
  -6   8   7 67.0878 15.9941  -2
   6   8   5 67.0878 15.9941   1
   3   9   4 117.652 14.6528  -2
  -3   9   5 117.652 14.6528   1
   2   9   4 149.173 34.9601  -2
  -2   9   5 149.173 34.9601   1
   1   9   5 143.687 35.4578  -2
  -1   9   5 143.687 35.4578   1
   0   9   5 165.993 24.7391  -2
   0   9   5 165.993 24.7391   1
 -15   0   6 70.6231 74.4414   1
  14   0   1 515.585 96.6867  -2
 -14   0   6 515.585 96.6867   1
  12   0   2 469.143 41.1311  -2
 -12   0   6 469.143 41.1311   1
  11   0   2 19.0610 30.9461  -2
 -11   0   6 19.0610 30.9461   1
  10   0   3 902.852 383.090  -2
 -10   0   6 902.852 383.090   1
   9   0   3 -55.383 12.7437  -2
  -9   0   6 -55.383 12.7437   1
   8   0   3 478.365 36.7469  -2
  -8   0   6 478.365 36.7469   1
   7   0   4 120.560 25.2088  -2
  -7   0   6 120.560 25.2088   1
   6   0   4 206.722 11.3000  -2
  -6   0   6 206.722 11.3000   1
   5   0   4 10.0512 5.93223  -2
  -5   0   6 10.0512 5.93223   1
   4   0   5 760.098 31.8474  -2
  -4   0   6 760.098 31.8474   1
   3   0   5 -1.2637 3.09461  -2
  -3   0   6 -1.2637 3.09461   1
   2   0   5 488.965 24.1272  -2
  -2   0   6 488.965 24.1272   1
   0   0   6 359.457 16.5419  -2
   0   0   6 359.457 16.5419   1
  -1   0   6 20.3056 11.0922  -2
   1   0   6 20.3056 11.0922   1
  -2   0   7 1228.46 47.1206  -2
   2   0   6 1228.46 47.1206   1
  -3   0   7 10.6503 4.70929  -2
   3   0   6 10.6503 4.70929   1
  -4   0   7 829.105 31.3331  -2
   4   0   6 829.105 31.3331   1
  -5   0   8 227.176 259.366  -2
   5   0   6 227.176 259.366   1
  -6   0   8 515.944 26.2544  -2
   6   0   6 515.944 26.2544   1
  -7   0   8 239.642 415.477  -2
   7   0   6 239.642 415.477   1
  -9   0   9 7.70614 23.2128  -2
   9   0   6 7.70614 23.2128   1
 -10   0   9 -290.70 607.831  -2
  10   0   6 -290.70 607.831   1
 -11   0  10 9.18429 45.5916  -2
  11   0   6 9.18429 45.5916   1
 -12   0  10 309.016 33.4915  -2
  12   0   6 309.016 33.4915   1
  14   1   1 290.549 62.1061  -2
 -14   1   6 290.549 62.1061   1
  12   1   2 336.587 23.3973  -2
 -12   1   6 336.587 23.3973   1
  11   1   2 222.038 21.4876  -2
 -11   1   6 222.038 21.4876   1
  10   1   3 681.767 49.6740  -2
 -10   1   6 681.767 49.6740   1
   9   1   3 130.137 8.09423  -2
  -9   1   6 130.137 8.09423   1
   8   1   3 391.992 22.9673  -2
  -8   1   6 391.992 22.9673   1
   7   1   4 370.897 20.4239  -2
  -7   1   6 370.897 20.4239   1
   6   1   4 624.730 20.2682  -2
  -6   1   6 624.730 20.2682   1
   5   1   4 487.457 18.9346  -2
  -5   1   6 487.457 18.9346   1
   4   1   5 1714.12 49.5661  -2
  -4   1   6 1714.12 49.5661   1
   3   1   5 918.310 26.6345  -2
  -3   1   6 918.310 26.6345   1
   2   1   5 3354.66 95.1127  -2
  -2   1   6 3354.66 95.1127   1
   1   1   6 1426.96 44.4288  -2
  -1   1   6 1426.96 44.4288   1
   0   1   6 5020.07 137.887  -2
   0   1   6 5020.07 137.887   1
  -1   1   6 1250.57 35.2694  -2
   1   1   6 1250.57 35.2694   1
  -2   1   7 1711.67 56.1644  -2
   2   1   6 1711.67 56.1644   1
  -3   1   7 482.379 14.2183  -2
   3   1   6 482.379 14.2183   1
  -4   1   7 943.332 28.5376  -2
   4   1   6 943.332 28.5376   1
  -5   1   8 284.180 12.1128  -2
   5   1   6 284.180 12.1128   1
  -6   1   8 637.843 20.9037  -2
   6   1   6 637.843 20.9037   1
  -7   1   8 72.5890 12.6079  -2
   7   1   6 72.5890 12.6079   1
  -8   1   9 271.500 17.9278  -2
   8   1   6 271.500 17.9278   1
  -9   1   9 -61.005 22.0711  -2
   9   1   6 -61.005 22.0711   1
 -10   1   9 -586.50 618.379  -2
  10   1   6 -586.50 618.379   1
 -11   1  10 65.5189 33.6701  -2
  11   1   6 65.5189 33.6701   1
 -12   1  10 72.5992 28.1656  -2
  12   1   6 72.5992 28.1656   1
  14   2   1 146.342 57.7216  -2
 -14   2   6 146.342 57.7216   1
  12   2   2 188.345 14.8008  -2
 -12   2   6 188.345 14.8008   1
  11   2   2 392.418 31.8845  -2
 -11   2   6 392.418 31.8845   1
  10   2   3 259.350 386.379  -2
 -10   2   6 259.350 386.379   1
   9   2   3 195.266 18.9865  -2
  -9   2   6 195.266 18.9865   1
   8   2   3 -99.542 29.9845  -2
  -8   2   6 -99.542 29.9845   1
   7   2   4 368.675 16.0953  -2
  -7   2   6 368.675 16.0953   1
   6   2   4 70.4731 5.13769  -2
  -6   2   6 70.4731 5.13769   1
   5   2   4 843.784 24.6493  -2
  -5   2   6 843.784 24.6493   1
   4   2   5 137.129 5.91925  -2
  -4   2   6 137.129 5.91925   1
   3   2   5 640.937 20.1800  -2
  -3   2   6 640.937 20.1800   1
   2   2   5 221.297 6.51476  -2
  -2   2   6 221.297 6.51476   1
   1   2   6 143.217 6.31858  -2
  -1   2   6 143.217 6.31858   1
   0   2   6 -72.968 78.5031  -2
   0   2   6 -72.968 78.5031   1
  -1   2   6 220.017 8.08075  -2
   1   2   6 220.017 8.08075   1
  -2   2   7 236.943 8.77393  -2
   2   2   6 236.943 8.77393   1
  -3   2   7 1272.81 42.5382  -2
   3   2   6 1272.81 42.5382   1
  -4   2   7 157.189 10.2286  -2
   4   2   6 157.189 10.2286   1
  -5   2   8 653.436 27.6535  -2
   5   2   6 653.436 27.6535   1
  -6   2   8 220.163 8.84828  -2
   6   2   6 220.163 8.84828   1
  -7   2   8 212.723 16.2718  -2
   7   2   6 212.723 16.2718   1
  -8   2   9 350.283 18.6742  -2
   8   2   6 350.283 18.6742   1
  -9   2   9 245.136 16.4135  -2
   9   2   6 245.136 16.4135   1
 -10   2   9 177.447 30.9387  -2
  10   2   6 177.447 30.9387   1
 -11   2  10 200.429 37.1545  -2
  11   2   6 200.429 37.1545   1
 -12   2  10 70.8099 25.9208  -2
  12   2   6 70.8099 25.9208   1
  14   3   1 321.520 89.6820  -2
 -14   3   6 321.520 89.6820   1
  12   3   2 66.0396 17.2872  -2
 -12   3   6 66.0396 17.2872   1
  11   3   2 316.796 33.5402  -2
 -11   3   6 316.796 33.5402   1
  10   3   3 -9.3648 25.7708  -2
 -10   3   6 -9.3648 25.7708   1
   9   3   3 253.022 17.3080  -2
  -9   3   6 253.022 17.3080   1
   7   3   4 688.198 77.4431  -2
  -7   3   6 688.198 77.4431   1
   6   3   4 371.429 15.6964  -2
  -6   3   6 371.429 15.6964   1
   5   3   4 1161.82 33.3520  -2
  -5   3   6 1161.82 33.3520   1
   4   3   5 287.542 16.4494  -2
  -4   3   6 287.542 16.4494   1
   3   3   5 1620.37 45.1751  -2
  -3   3   6 1620.37 45.1751   1
   2   3   5 194.024 10.9621  -2
  -2   3   6 194.024 10.9621   1
   1   3   6 2692.29 90.0452  -2
  -1   3   6 2692.29 90.0452   1
   0   3   6 173.172 8.78140  -2
   0   3   6 173.172 8.78140   1
  -1   3   6 2414.20 92.2296  -2
   1   3   6 2414.20 92.2296   1
  -2   3   7 324.115 10.7573  -2
   2   3   6 324.115 10.7573   1
  -3   3   7 902.040 30.2643  -2
   3   3   6 902.040 30.2643   1
  -4   3   7 162.966 9.06265  -2
   4   3   6 162.966 9.06265   1
  -5   3   8 643.771 19.8404  -2
   5   3   6 643.771 19.8404   1
  -6   3   8 121.939 9.96831  -2
   6   3   6 121.939 9.96831   1
  -7   3   8 402.081 21.2635  -2
   7   3   6 402.081 21.2635   1
  -8   3   9 128.678 17.1091  -2
   8   3   6 128.678 17.1091   1
  -9   3   9 178.719 14.9628  -2
   9   3   6 178.719 14.9628   1
 -10   3   9 -18.785 43.7582  -2
  10   3   6 -18.785 43.7582   1
 -11   3  10 278.717 33.7364  -2
  11   3   6 278.717 33.7364   1
 -12   3  10 54.4684 23.1988  -2
  12   3   6 54.4684 23.1988   1
  13   4   2 150.287 35.0048  -2
 -13   4   6 150.287 35.0048   1
  12   4   2 142.219 32.7049  -2
 -12   4   6 142.219 32.7049   1
  11   4   2 272.185 33.0224  -2
 -11   4   6 272.185 33.0224   1
  10   4   3 799.142 618.302  -2
 -10   4   6 799.142 618.302   1
   9   4   3 122.858 17.7875  -2
  -9   4   6 122.858 17.7875   1
   8   4   3 288.205 25.2089  -2
  -8   4   6 288.205 25.2089   1
   7   4   4 97.1621 26.6140  -2
  -7   4   6 97.1621 26.6140   1
   6   4   4 103.428 8.60461  -2
  -6   4   6 103.428 8.60461   1
   5   4   4 221.401 8.67639  -2
  -5   4   6 221.401 8.67639   1
   4   4   5 119.527 24.6259  -2
  -4   4   6 119.527 24.6259   1
   3   4   5 90.4698 6.91620  -2
  -3   4   6 90.4698 6.91620   1
   2   4   5 139.013 11.2652  -2
  -2   4   6 139.013 11.2652   1
   1   4   6 65.3178 7.92609  -2
  -1   4   6 65.3178 7.92609   1
   0   4   6 103.992 6.78172  -2
   0   4   6 103.992 6.78172   1
  -1   4   6 132.440 14.8885  -2
   1   4   6 132.440 14.8885   1
  -2   4   7 322.224 15.4768  -2
   2   4   6 322.224 15.4768   1
  -3   4   7 142.074 11.7215  -2
   3   4   6 142.074 11.7215   1
  -4   4   7 249.827 18.0971  -2
   4   4   6 249.827 18.0971   1
  -5   4   8 292.778 22.6040  -2
   5   4   6 292.778 22.6040   1
  -6   4   8 93.3385 11.8551  -2
   6   4   6 93.3385 11.8551   1
  -7   4   8 497.564 33.1270  -2
   7   4   6 497.564 33.1270   1
  -8   4   9 394.856 21.0277  -2
   8   4   6 394.856 21.0277   1
  -9   4   9 205.288 19.7394  -2
   9   4   6 205.288 19.7394   1
 -11   4  10 356.093 50.5365  -2
  11   4   6 356.093 50.5365   1
  12   5   2 187.836 31.4093  -2
 -12   5   6 187.836 31.4093   1
  11   5   2 137.333 37.4010  -2
 -11   5   6 137.333 37.4010   1
  10   5   3 1552.08 1284.52  -2
 -10   5   6 1552.08 1284.52   1
   9   5   3 -338.10 327.962  -2
  -9   5   6 -338.10 327.962   1
   7   5   4 -113.47 190.552  -2
  -7   5   6 -113.47 190.552   1
   6   5   4 262.927 13.6777  -2
  -6   5   6 262.927 13.6777   1
   5   5   4 675.357 29.5688  -2
  -5   5   6 675.357 29.5688   1
   4   5   5 271.046 23.6698  -2
  -4   5   6 271.046 23.6698   1
   3   5   5 513.226 23.1620  -2
  -3   5   6 513.226 23.1620   1
   2   5   5 29.0159 437.442  -2
  -2   5   6 29.0159 437.442   1
   1   5   6 313.107 18.0387  -2
  -1   5   6 313.107 18.0387   1
   0   5   6 1050.65 47.3294  -2
   0   5   6 1050.65 47.3294   1
  -1   5   6 334.917 22.5425  -2
   1   5   6 334.917 22.5425   1
  -2   5   7 553.442 23.9574  -2
   2   5   6 553.442 23.9574   1
  -3   5   7 579.674 24.3505  -2
   3   5   6 579.674 24.3505   1
  -4   5   7 647.390 255.501  -2
   4   5   6 647.390 255.501   1
  -5   5   8 239.992 22.9290  -2
   5   5   6 239.992 22.9290   1
  -6   5   8 266.702 13.3718  -2
   6   5   6 266.702 13.3718   1
  -7   5   8 189.707 36.9595  -2
   7   5   6 189.707 36.9595   1
  -8   5   9 332.092 47.4879  -2
   8   5   6 332.092 47.4879   1
  -9   5   9 47.1410 20.3819  -2
   9   5   6 47.1410 20.3819   1
  11   6   2 353.429 97.4294  -2
 -11   6   6 353.429 97.4294   1
  10   6   3 180.767 40.4064  -2
 -10   6   6 180.767 40.4064   1
   9   6   3 166.514 19.0854  -2
  -9   6   6 166.514 19.0854   1
   8   6   3 179.979 33.1306  -2
  -8   6   6 179.979 33.1306   1
   7   6   4 233.348 20.8771  -2
  -7   6   6 233.348 20.8771   1
   6   6   4 115.155 7.09435  -2
  -6   6   6 115.155 7.09435   1
   5   6   4 213.558 17.0857  -2
  -5   6   6 213.558 17.0857   1
   4   6   5 282.117 553.324  -2
  -4   6   6 282.117 553.324   1
   3   6   5 101.124 10.3938  -2
  -3   6   6 101.124 10.3938   1
   2   6   5 110.532 21.5240  -2
  -2   6   6 110.532 21.5240   1
   1   6   6 128.178 16.7899  -2
  -1   6   6 128.178 16.7899   1
   0   6   6 123.859 13.1031  -2
   0   6   6 123.859 13.1031   1
  -1   6   6 122.348 16.5886  -2
   1   6   6 122.348 16.5886   1
  -2   6   7 972.781 203.294  -2
   2   6   6 972.781 203.294   1
  -3   6   7 194.314 10.1984  -2
   3   6   6 194.314 10.1984   1
  -4   6   7 130.829 19.5017  -2
   4   6   6 130.829 19.5017   1
  -5   6   8 189.671 27.3697  -2
   5   6   6 189.671 27.3697   1
  -6   6   8 157.630 16.9317  -2
   6   6   6 157.630 16.9317   1
  -7   6   8 396.392 56.2646  -2
   7   6   6 396.392 56.2646   1
  -8   6   9 210.483 50.3861  -2
   8   6   6 210.483 50.3861   1
  -9   6   9 290.269 47.9176  -2
   9   6   6 290.269 47.9176   1
   9   7   3 93.6382 29.6954  -2
  -9   7   6 93.6382 29.6954   1
   8   7   3 375.749 48.2076  -2
  -8   7   6 375.749 48.2076   1
   7   7   4 171.491 29.4933  -2
  -7   7   6 171.491 29.4933   1
   6   7   4 439.937 22.8605  -2
  -6   7   6 439.937 22.8605   1
   5   7   4 149.742 16.4645  -2
  -5   7   6 149.742 16.4645   1
   4   7   5 426.493 41.7857  -2
  -4   7   6 426.493 41.7857   1
   3   7   5 53.0140 7.94188  -2
  -3   7   6 53.0140 7.94188   1
   2   7   5 333.781 20.2351  -2
  -2   7   6 333.781 20.2351   1
   1   7   6 57.5862 17.8266  -2
  -1   7   6 57.5862 17.8266   1
   0   7   6 248.677 16.0442  -2
   0   7   6 248.677 16.0442   1
  -1   7   6 108.968 20.0933  -2
   1   7   6 108.968 20.0933   1
  -2   7   7 289.117 27.0197  -2
   2   7   6 289.117 27.0197   1
  -3   7   7 94.4728 12.3479  -2
   3   7   6 94.4728 12.3479   1
  -4   7   7 455.352 36.5718  -2
   4   7   6 455.352 36.5718   1
  -5   7   8 109.557 33.6684  -2
   5   7   6 109.557 33.6684   1
  -6   7   8 489.002 39.9894  -2
   6   7   6 489.002 39.9894   1
  -7   7   8 205.398 42.6129  -2
   7   7   6 205.398 42.6129   1
  -7   8   6 74.1506 41.4485   1
   6   8   4 109.612 31.3304  -2
  -6   8   6 109.612 31.3304   1
   5   8   4 156.515 40.4454  -2
  -5   8   6 156.515 40.4454   1
   4   8   5 49.2561 20.1630  -2
  -4   8   6 49.2561 20.1630   1
   3   8   5 100.394 10.8895  -2
  -3   8   6 100.394 10.8895   1
   2   8   5 42.4357 17.9298  -2
  -2   8   6 42.4357 17.9298   1
   1   8   6 12.6429 18.7351  -2
  -1   8   6 12.6429 18.7351   1
   0   8   6 27.2808 8.60026  -2
   0   8   6 27.2808 8.60026   1
  -1   8   6 54.4973 29.4377  -2
   1   8   6 54.4973 29.4377   1
  -2   8   7 120.774 20.3672  -2
   2   8   6 120.774 20.3672   1
  -3   8   7 28.9525 9.16680  -2
   3   8   6 28.9525 9.16680   1
  -4   8   7 219.099 26.7381  -2
   4   8   6 219.099 26.7381   1
  14   0   2 203.079 85.5688  -2
 -14   0   7 203.079 85.5688   1
  12   0   3 147.443 24.2451  -2
 -12   0   7 147.443 24.2451   1
  11   0   3 -12.237 63.7423  -2
 -11   0   7 -12.237 63.7423   1
  10   0   4 36.0347 32.9037  -2
 -10   0   7 36.0347 32.9037   1
   9   0   4 -65.641 12.5294  -2
  -9   0   7 -65.641 12.5294   1
   8   0   4 59.9087 11.3812  -2
  -8   0   7 59.9087 11.3812   1
   7   0   5 -194.63 13.9111  -2
  -7   0   7 -194.63 13.9111   1
   6   0   5 68.5097 6.38055  -2
  -6   0   7 68.5097 6.38055   1
   5   0   5 -9.9076 14.8037  -2
  -5   0   7 -9.9076 14.8037   1
   4   0   6 1442.02 66.6191  -2
  -4   0   7 1442.02 66.6191   1
   3   0   6 -0.9255 3.70879  -2
  -3   0   7 -0.9255 3.70879   1
   2   0   6 2724.17 124.508  -2
  -2   0   7 2724.17 124.508   1
   1   0   7 101.508 218.490  -2
  -1   0   7 101.508 218.490   1
   0   0   7 3876.88 176.808  -2
   0   0   7 3876.88 176.808   1
  -1   0   7 -4.7141 8.26110  -2
   1   0   7 -4.7141 8.26110   1
  -2   0   8 2073.70 106.201  -2
   2   0   7 2073.70 106.201   1
  -3   0   8 9.81758 7.12586  -2
   3   0   7 9.81758 7.12586   1
  -4   0   8 1699.83 77.5204  -2
   4   0   7 1699.83 77.5204   1
  -5   0   9 191.617 290.179  -2
   5   0   7 191.617 290.179   1
  -6   0   9 1120.93 53.1832  -2
   6   0   7 1120.93 53.1832   1
  -7   0   9 814.815 672.652  -2
   7   0   7 814.815 672.652   1
  -8   0  10 702.467 46.7587  -2
   8   0   7 702.467 46.7587   1
  -9   0  10 -38.502 16.2541  -2
   9   0   7 -38.502 16.2541   1
 -10   0  10 1009.77 92.0013  -2
  10   0   7 1009.77 92.0013   1
 -11   0  11 -39.801 45.2733  -2
  11   0   7 -39.801 45.2733   1
 -12   0  11 316.995 35.4839  -2
  12   0   7 316.995 35.4839   1
  14   1   2 365.849 64.2013  -2
 -14   1   7 365.849 64.2013   1
  12   1   3 330.268 27.5560  -2
 -12   1   7 330.268 27.5560   1
  11   1   3 174.183 21.0590  -2
 -11   1   7 174.183 21.0590   1
  10   1   4 48.0612 591.691  -2
 -10   1   7 48.0612 591.691   1
   9   1   4 86.6607 8.57162  -2
  -9   1   7 86.6607 8.57162   1
   8   1   4 584.798 23.6235  -2
  -8   1   7 584.798 23.6235   1
   7   1   5 -258.78 17.4144  -2
  -7   1   7 -258.78 17.4144   1
   6   1   5 727.383 32.6631  -2
  -6   1   7 727.383 32.6631   1
   5   1   5 255.230 9.18228  -2
  -5   1   7 255.230 9.18228   1
   4   1   6 832.379 26.2778  -2
  -4   1   7 832.379 26.2778   1
   3   1   6 234.027 9.10796  -2
  -3   1   7 234.027 9.10796   1
   2   1   6 729.732 22.0140  -2
  -2   1   7 729.732 22.0140   1
   1   1   7 127.809 6.63689  -2
  -1   1   7 127.809 6.63689   1
   0   1   7 48.9914 3.49017  -2
   0   1   7 48.9914 3.49017   1
  -1   1   7 253.634 7.10928  -2
   1   1   7 253.634 7.10928   1
  -2   1   8 418.064 15.7039  -2
   2   1   7 418.064 15.7039   1
  -3   1   8 552.498 20.0337  -2
   3   1   7 552.498 20.0337   1
  -4   1   8 805.222 22.1696  -2
   4   1   7 805.222 22.1696   1
  -5   1   9 359.822 16.6075  -2
   5   1   7 359.822 16.6075   1
  -6   1   9 236.068 12.6512  -2
   6   1   7 236.068 12.6512   1
  -7   1   9 270.908 19.5751  -2
   7   1   7 270.908 19.5751   1
  -8   1  10 303.684 17.5412  -2
   8   1   7 303.684 17.5412   1
  -9   1  10 226.684 13.4278  -2
   9   1   7 226.684 13.4278   1
 -10   1  10 182.810 34.4701  -2
  10   1   7 182.810 34.4701   1
 -11   1  11 114.881 35.1554  -2
  11   1   7 114.881 35.1554   1
 -12   1  11 76.9025 44.0470  -2
  12   1   7 76.9025 44.0470   1
  14   2   2 94.9904 56.1910  -2
 -14   2   7 94.9904 56.1910   1
  12   2   3 104.528 17.1694  -2
 -12   2   7 104.528 17.1694   1
  11   2   3 296.870 26.1584  -2
 -11   2   7 296.870 26.1584   1
  10   2   4 -326.71 510.971  -2
 -10   2   7 -326.71 510.971   1
   9   2   4 0.97571 10.7741  -2
  -9   2   7 0.97571 10.7741   1
   8   2   4 246.273 204.382  -2
  -8   2   7 246.273 204.382   1
   7   2   5 124.282 17.3398  -2
  -7   2   7 124.282 17.3398   1
   6   2   5 231.309 9.10143  -2
  -6   2   7 231.309 9.10143   1
   5   2   5 822.184 29.4207  -2
  -5   2   7 822.184 29.4207   1
   4   2   6 273.436 10.1278  -2
  -4   2   7 273.436 10.1278   1
   3   2   6 1885.63 58.2984  -2
  -3   2   7 1885.63 58.2984   1
   2   2   6 479.444 12.9338  -2
  -2   2   7 479.444 12.9338   1
   1   2   7 2065.80 66.9976  -2
  -1   2   7 2065.80 66.9976   1
   0   2   7 471.623 22.2090  -2
   0   2   7 471.623 22.2090   1
  -1   2   7 2069.20 61.7100  -2
   1   2   7 2069.20 61.7100   1
  -2   2   8 641.825 21.2036  -2
   2   2   7 641.825 21.2036   1
  -3   2   8 769.014 31.3079  -2
   3   2   7 769.014 31.3079   1
  -4   2   8 576.775 25.7211  -2
   4   2   7 576.775 25.7211   1
  -5   2   9 672.237 30.1566  -2
   5   2   7 672.237 30.1566   1
  -6   2   9 316.562 17.5946  -2
   6   2   7 316.562 17.5946   1
  -7   2   9 345.507 28.1949  -2
   7   2   7 345.507 28.1949   1
  -8   2  10 -397.35 537.546  -2
   8   2   7 -397.35 537.546   1
  -9   2  10 635.243 22.4305  -2
   9   2   7 635.243 22.4305   1
 -10   2  10 -140.91 30.8192  -2
  10   2   7 -140.91 30.8192   1
 -11   2  11 523.558 50.4025  -2
  11   2   7 523.558 50.4025   1
 -12   2  11 171.771 53.9975  -2
  12   2   7 171.771 53.9975   1
  12   3   3 197.732 16.7370  -2
 -12   3   7 197.732 16.7370   1
  11   3   3 353.925 35.0392  -2
 -11   3   7 353.925 35.0392   1
  10   3   4 167.672 30.5179  -2
 -10   3   7 167.672 30.5179   1
   9   3   4 316.767 15.6105  -2
  -9   3   7 316.767 15.6105   1
   8   3   4 485.189 31.3342  -2
  -8   3   7 485.189 31.3342   1
   7   3   5 139.218 294.237  -2
  -7   3   7 139.218 294.237   1
   6   3   5 159.157 9.44741  -2
  -6   3   7 159.157 9.44741   1
   5   3   5 589.911 23.3797  -2
  -5   3   7 589.911 23.3797   1
   4   3   6 -28.923 9.88148  -2
  -4   3   7 -28.923 9.88148   1
   3   3   6 456.396 15.6378  -2
  -3   3   7 456.396 15.6378   1
   2   3   6 163.429 8.03865  -2
  -2   3   7 163.429 8.03865   1
   1   3   7 129.220 10.1130  -2
  -1   3   7 129.220 10.1130   1
   0   3   7 39.3039 97.8101  -2
   0   3   7 39.3039 97.8101   1
  -1   3   7 37.3954 8.83567  -2
   1   3   7 37.3954 8.83567   1
  -2   3   8 149.312 15.7990  -2
   2   3   7 149.312 15.7990   1
  -3   3   8 200.968 9.39574  -2
   3   3   7 200.968 9.39574   1
  -4   3   8 188.572 15.4364  -2
   4   3   7 188.572 15.4364   1
  -5   3   9 44.6450 513.095  -2
   5   3   7 44.6450 513.095   1
  -6   3   9 -152.85 191.148  -2
   6   3   7 -152.85 191.148   1
  -7   3   9 84.9447 18.0111  -2
   7   3   7 84.9447 18.0111   1
  -8   3  10 90.3803 16.4458  -2
   8   3   7 90.3803 16.4458   1
  -9   3  10 -50.160 29.3881  -2
   9   3   7 -50.160 29.3881   1
 -10   3  10 54.7751 48.3229  -2
  10   3   7 54.7751 48.3229   1
 -11   3  11 102.891 42.2771  -2
  11   3   7 102.891 42.2771   1
  12   4   3 93.0793 32.6340  -2
 -12   4   7 93.0793 32.6340   1
  11   4   3 220.452 32.4462  -2
 -11   4   7 220.452 32.4462   1
  10   4   4 19.1991 31.0277  -2
 -10   4   7 19.1991 31.0277   1
   9   4   4 155.368 16.2861  -2
  -9   4   7 155.368 16.2861   1
   8   4   4 228.112 22.4858  -2
  -8   4   7 228.112 22.4858   1
   7   4   5 56.7041 15.6630  -2
  -7   4   7 56.7041 15.6630   1
   6   4   5 242.314 13.0059  -2
  -6   4   7 242.314 13.0059   1
   5   4   5 15.6705 94.3581  -2
  -5   4   7 15.6705 94.3581   1
   4   4   6 209.281 14.4976  -2
  -4   4   7 209.281 14.4976   1
   3   4   6 379.568 14.8435  -2
  -3   4   7 379.568 14.8435   1
   2   4   6 405.595 18.9068  -2
  -2   4   7 405.595 18.9068   1
   1   4   7 974.638 36.2983  -2
  -1   4   7 974.638 36.2983   1
   0   4   7 307.947 12.8351  -2
   0   4   7 307.947 12.8351   1
  -1   4   7 648.902 48.5827  -2
   1   4   7 648.902 48.5827   1
  -2   4   8 117.793 11.6143  -2
   2   4   7 117.793 11.6143   1
  -3   4   8 1031.33 33.7715  -2
   3   4   7 1031.33 33.7715   1
  -4   4   8 854.808 301.720  -2
   4   4   7 854.808 301.720   1
  -5   4   9 -198.83 330.860  -2
   5   4   7 -198.83 330.860   1
  -6   4   9 145.179 9.63219  -2
   6   4   7 145.179 9.63219   1
  -7   4   9 -51.155 564.739  -2
   7   4   7 -51.155 564.739   1
  -8   4  10 23.2346 19.3550  -2
   8   4   7 23.2346 19.3550   1
  -9   4  10 240.576 20.6719  -2
   9   4   7 240.576 20.6719   1
  12   5   3 144.810 31.4980  -2
 -12   5   7 144.810 31.4980   1
  11   5   3 388.266 49.4625  -2
 -11   5   7 388.266 49.4625   1
  10   5   4 88.6718 35.4244  -2
 -10   5   7 88.6718 35.4244   1
   9   5   4 301.409 19.4107  -2
  -9   5   7 301.409 19.4107   1
   8   5   4 -266.99 1267.55  -2
  -8   5   7 -266.99 1267.55   1
   7   5   5 135.869 158.139  -2
  -7   5   7 135.869 158.139   1
   6   5   5 113.617 12.7048  -2
  -6   5   7 113.617 12.7048   1
   5   5   5 343.100 15.3647  -2
  -5   5   7 343.100 15.3647   1
   4   5   6 239.582 18.6347  -2
  -4   5   7 239.582 18.6347   1
   3   5   6 389.699 21.0621  -2
  -3   5   7 389.699 21.0621   1
   2   5   6 1723.30 737.079  -2
  -2   5   7 1723.30 737.079   1
   1   5   7 190.180 15.2592  -2
  -1   5   7 190.180 15.2592   1
   0   5   7 70.5909 17.8600  -2
   0   5   7 70.5909 17.8600   1
  -1   5   7 174.900 18.0931  -2
   1   5   7 174.900 18.0931   1
  -2   5   8 207.209 13.2476  -2
   2   5   7 207.209 13.2476   1
  -3   5   8 24.9920 6.54426  -2
   3   5   7 24.9920 6.54426   1
  -4   5   8 169.285 15.1909  -2
   4   5   7 169.285 15.1909   1
  -5   5   9 140.385 15.1078  -2
   5   5   7 140.385 15.1078   1
  -6   5   9 202.775 12.9909  -2
   6   5   7 202.775 12.9909   1
  -7   5   9 159.408 32.6441  -2
   7   5   7 159.408 32.6441   1
  -8   5  10 159.353 47.6748  -2
   8   5   7 159.353 47.6748   1
  -9   5  10 91.6938 25.5155  -2
   9   5   7 91.6938 25.5155   1
  10   6   4 355.086 89.1253  -2
 -10   6   7 355.086 89.1253   1
   9   6   4 180.990 30.9749  -2
  -9   6   7 180.990 30.9749   1
   8   6   4 152.226 34.1794  -2
  -8   6   7 152.226 34.1794   1
   7   6   5 444.072 62.9236  -2
  -7   6   7 444.072 62.9236   1
   6   6   5 174.576 12.2096  -2
  -6   6   7 174.576 12.2096   1
   5   6   5 2557.59 638.231  -2
  -5   6   7 2557.59 638.231   1
   4   6   6 -202.85 43.5913  -2
  -4   6   7 -202.85 43.5913   1
   3   6   6 135.429 15.3514  -2
  -3   6   7 135.429 15.3514   1
   2   6   6 768.400 25.1367  -2
  -2   6   7 768.400 25.1367   1
   1   6   7 39.7055 15.8838  -2
  -1   6   7 39.7055 15.8838   1
   0   6   7 490.708 24.4577  -2
   0   6   7 490.708 24.4577   1
  -1   6   7 -422.01 30.9304  -2
   1   6   7 -422.01 30.9304   1
  -2   6   8 584.696 26.9758  -2
   2   6   7 584.696 26.9758   1
  -3   6   8 -33.062 212.349  -2
   3   6   7 -33.062 212.349   1
  -4   6   8 516.865 32.4341  -2
   4   6   7 516.865 32.4341   1
  -5   6   9 264.024 26.7533  -2
   5   6   7 264.024 26.7533   1
  -6   6   9 306.479 24.2030  -2
   6   6   7 306.479 24.2030   1
  -7   6   9 66.5323 47.3011  -2
   7   6   7 66.5323 47.3011   1
  -8   6  10 249.537 55.8320  -2
   8   6   7 249.537 55.8320   1
  -9   6  10 -4.9149 37.4109  -2
   9   6   7 -4.9149 37.4109   1
   9   7   4 479.147 94.6957  -2
  -9   7   7 479.147 94.6957   1
   8   7   4 272.255 42.7658  -2
  -8   7   7 272.255 42.7658   1
   7   7   5 92.9830 33.9292  -2
  -7   7   7 92.9830 33.9292   1
   6   7   5 233.635 16.3267  -2
  -6   7   7 233.635 16.3267   1
   5   7   5 180.922 19.1033  -2
  -5   7   7 180.922 19.1033   1
   4   7   6 213.753 25.3984  -2
  -4   7   7 213.753 25.3984   1
   3   7   6 46.0763 12.1432  -2
  -3   7   7 46.0763 12.1432   1
   2   7   6 207.485 21.9151  -2
  -2   7   7 207.485 21.9151   1
   1   7   7 65.3226 17.9666  -2
  -1   7   7 65.3226 17.9666   1
   0   7   7 195.079 15.6764  -2
   0   7   7 195.079 15.6764   1
  -1   7   7 80.0632 20.9794  -2
   1   7   7 80.0632 20.9794   1
  -2   7   8 122.332 18.9898  -2
   2   7   7 122.332 18.9898   1
  -3   7   8 93.7267 12.2195  -2
   3   7   7 93.7267 12.2195   1
  -4   7   8 120.389 26.6694  -2
   4   7   7 120.389 26.6694   1
  -5   7   9 147.055 29.7757  -2
   5   7   7 147.055 29.7757   1
  -6   7   9 78.0238 20.6360  -2
   6   7   7 78.0238 20.6360   1
  -7   7   9 126.670 56.1989  -2
   7   7   7 126.670 56.1989   1
   6   8   5 155.600 14.4441  -2
  -6   8   7 155.600 14.4441   1
   5   8   5 158.953 25.9026  -2
  -5   8   7 158.953 25.9026   1
   4   8   6 182.262 26.5024  -2
  -4   8   7 182.262 26.5024   1
   3   8   6 6.10478 9.87524  -2
  -3   8   7 6.10478 9.87524   1
   2   8   6 149.101 31.6641  -2
  -2   8   7 149.101 31.6641   1
   1   8   7 45.8822 20.6654  -2
  -1   8   7 45.8822 20.6654   1
   0   8   7 66.2918 10.6863  -2
   0   8   7 66.2918 10.6863   1
  -1   8   7 130.432 20.2399  -2
   1   8   7 130.432 20.2399   1
  -2   8   8 219.460 27.6922  -2
   2   8   7 219.460 27.6922   1
  -3   8   8 125.383 17.7361  -2
   3   8   7 125.383 17.7361   1
  -4   8   8 513.278 57.6207  -2
   4   8   7 513.278 57.6207   1
  12   0   4 179.350 42.3003  -2
 -12   0   8 179.350 42.3003   1
  10   0   5 272.593 40.5574  -2
 -10   0   8 272.593 40.5574   1
   9   0   5 109.804 12.8876  -2
  -9   0   8 109.804 12.8876   1
   8   0   5 -43.147 15.9327  -2
  -8   0   8 -43.147 15.9327   1
   7   0   6 59.1535 21.6385  -2
  -7   0   8 59.1535 21.6385   1
   6   0   6 872.562 243.757  -2
  -6   0   8 872.562 243.757   1
   5   0   6 0.52753 17.9203  -2
  -5   0   8 0.52753 17.9203   1
   4   0   7 1524.05 88.8896  -2
  -4   0   8 1524.05 88.8896   1
   3   0   7 -8.0926 9.75031  -2
  -3   0   8 -8.0926 9.75031   1
   2   0   7 883.877 77.9105  -2
  -2   0   8 883.877 77.9105   1
   1   0   8 168.562 276.641  -2
  -1   0   8 168.562 276.641   1
   0   0   8 175.010 8.13734  -2
   0   0   8 175.010 8.13734   1
  -1   0   8 -2.1042 10.0939  -2
   1   0   8 -2.1042 10.0939   1
  -2   0   9 580.494 27.9702  -2
   2   0   8 580.494 27.9702   1
  -3   0   9 78.4122 5.16608  -2
   3   0   8 78.4122 5.16608   1
  -4   0   9 858.322 102.559  -2
   4   0   8 858.322 102.559   1
  -5   0  10 25.7611 17.1732  -2
   5   0   8 25.7611 17.1732   1
  -6   0  10 483.827 25.9692  -2
   6   0   8 483.827 25.9692   1
  -7   0  10 -95.466 20.0061  -2
   7   0   8 -95.466 20.0061   1
  -8   0  11 382.526 29.2250  -2
   8   0   8 382.526 29.2250   1
  -9   0  11 -27.432 25.3181  -2
   9   0   8 -27.432 25.3181   1
 -10   0  11 221.963 44.8281  -2
  10   0   8 221.963 44.8281   1
 -11   0  12 49.4788 50.4098  -2
  11   0   8 49.4788 50.4098   1
 -12   0  12 159.817 44.4047  -2
  12   0   8 159.817 44.4047   1
  12   1   4 234.969 23.1856  -2
 -12   1   8 234.969 23.1856   1
  11   1   4 313.214 26.6403  -2
 -11   1   8 313.214 26.6403   1
  10   1   5 375.837 27.6182  -2
 -10   1   8 375.837 27.6182   1
   9   1   5 172.587 11.6196  -2
  -9   1   8 172.587 11.6196   1
   8   1   5 655.905 20.5817  -2
  -8   1   8 655.905 20.5817   1
   7   1   6 702.748 212.481  -2
  -7   1   8 702.748 212.481   1
   6   1   6 581.904 25.5333  -2
  -6   1   8 581.904 25.5333   1
   5   1   6 413.793 40.0252  -2
  -5   1   8 413.793 40.0252   1
   4   1   7 708.096 35.5639  -2
  -4   1   8 708.096 35.5639   1
   3   1   7 468.293 14.1653  -2
  -3   1   8 468.293 14.1653   1
   2   1   7 623.462 19.5352  -2
  -2   1   8 623.462 19.5352   1
   1   1   8 158.850 9.01961  -2
  -1   1   8 158.850 9.01961   1
   0   1   8 504.595 18.0844  -2
   0   1   8 504.595 18.0844   1
  -1   1   8 166.034 7.34805  -2
   1   1   8 166.034 7.34805   1
  -2   1   9 427.731 22.8213  -2
   2   1   8 427.731 22.8213   1
  -3   1   9 61.1408 5.35200  -2
   3   1   8 61.1408 5.35200   1
  -4   1   9 838.773 29.4399  -2
   4   1   8 838.773 29.4399   1
  -5   1  10 260.645 14.1888  -2
   5   1   8 260.645 14.1888   1
  -6   1  10 456.032 16.0344  -2
   6   1   8 456.032 16.0344   1
  -7   1  10 274.097 17.9936  -2
   7   1   8 274.097 17.9936   1
  -8   1  11 493.546 23.6930  -2
   8   1   8 493.546 23.6930   1
  -9   1  11 301.515 16.4813  -2
   9   1   8 301.515 16.4813   1
 -10   1  11 589.673 34.0080  -2
  10   1   8 589.673 34.0080   1
 -11   1  12 190.821 32.9614  -2
  11   1   8 190.821 32.9614   1
 -12   1  12 185.684 41.9738  -2
  12   1   8 185.684 41.9738   1
  14   2   3 117.809 63.8090  -2
 -14   2   8 117.809 63.8090   1
  12   2   4 193.125 20.0512  -2
 -12   2   8 193.125 20.0512   1
  11   2   4 347.094 73.2672  -2
 -11   2   8 347.094 73.2672   1
   9   2   5 -8.2717 11.6537  -2
  -9   2   8 -8.2717 11.6537   1
   8   2   5 260.538 14.7542  -2
  -8   2   8 260.538 14.7542   1
   7   2   6 569.838 213.601  -2
  -7   2   8 569.838 213.601   1
   6   2   6 196.085 9.20765  -2
  -6   2   8 196.085 9.20765   1
   5   2   6 714.940 29.5776  -2
  -5   2   8 714.940 29.5776   1
   4   2   7 462.112 17.3339  -2
  -4   2   8 462.112 17.3339   1
   3   2   7 495.233 17.3973  -2
  -3   2   8 495.233 17.3973   1
   2   2   7 647.324 19.2952  -2
  -2   2   8 647.324 19.2952   1
   1   2   8 86.3529 10.6195  -2
  -1   2   8 86.3529 10.6195   1
   0   2   8 629.252 28.2661  -2
   0   2   8 629.252 28.2661   1
  -1   2   8 608.626 152.552  -2
   1   2   8 608.626 152.552   1
  -2   2   9 520.625 29.1437  -2
   2   2   8 520.625 29.1437   1
  -3   2   9 420.415 20.0978  -2
   3   2   8 420.415 20.0978   1
  -4   2   9 1218.88 399.431  -2
   4   2   8 1218.88 399.431   1
  -5   2  10 560.346 19.4529  -2
   5   2   8 560.346 19.4529   1
  -6   2  10 137.160 11.8286  -2
   6   2   8 137.160 11.8286   1
  -7   2  10 314.792 17.9233  -2
   7   2   8 314.792 17.9233   1
  -8   2  11 307.019 16.6623  -2
   8   2   8 307.019 16.6623   1
  -9   2  11 117.911 15.0096  -2
   9   2   8 117.911 15.0096   1
 -10   2  11 71.4616 21.4583  -2
  10   2   8 71.4616 21.4583   1
 -11   2  12 58.8177 28.8550  -2
  11   2   8 58.8177 28.8550   1
  12   3   4 135.070 20.0634  -2
 -12   3   8 135.070 20.0634   1
  11   3   4 474.294 50.5741  -2
 -11   3   8 474.294 50.5741   1
   9   3   5 246.512 14.6917  -2
  -9   3   8 246.512 14.6917   1
   8   3   5 42.4723 12.6855  -2
  -8   3   8 42.4723 12.6855   1
   7   3   6 330.862 25.9083  -2
  -7   3   8 330.862 25.9083   1
   6   3   6 240.048 10.8408  -2
  -6   3   8 240.048 10.8408   1
   5   3   6 -83.878 192.134  -2
  -5   3   8 -83.878 192.134   1
   4   3   7 536.397 18.1417  -2
  -4   3   8 536.397 18.1417   1
   3   3   7 370.802 11.5566  -2
  -3   3   8 370.802 11.5566   1
   2   3   7 19.3464 127.600  -2
  -2   3   8 19.3464 127.600   1
   1   3   8 476.554 26.4028  -2
  -1   3   8 476.554 26.4028   1
   0   3   8 74.2865 10.6787  -2
   0   3   8 74.2865 10.6787   1
  -1   3   8 534.099 51.2220  -2
   1   3   8 534.099 51.2220   1
  -2   3   9 184.199 10.9409  -2
   2   3   8 184.199 10.9409   1
  -3   3   9 663.586 24.8928  -2
   3   3   8 663.586 24.8928   1
  -4   3   9 194.586 11.1635  -2
   4   3   8 194.586 11.1635   1
  -5   3  10 425.831 21.0293  -2
   5   3   8 425.831 21.0293   1
  -6   3  10 233.721 10.4723  -2
   6   3   8 233.721 10.4723   1
  -7   3  10 324.667 25.4459  -2
   7   3   8 324.667 25.4459   1
  -8   3  11 158.629 17.3098  -2
   8   3   8 158.629 17.3098   1
  -9   3  11 500.931 28.0637  -2
   9   3   8 500.931 28.0637   1
 -10   3  11 31.8906 33.4509  -2
  10   3   8 31.8906 33.4509   1
 -11   3  12 377.196 47.9754  -2
  11   3   8 377.196 47.9754   1
  12   4   4 62.9971 17.8331  -2
 -12   4   8 62.9971 17.8331   1
  11   4   4 405.624 49.3384  -2
 -11   4   8 405.624 49.3384   1
  10   4   5 84.0065 33.5807  -2
 -10   4   8 84.0065 33.5807   1
   9   4   5 163.314 16.5216  -2
  -9   4   8 163.314 16.5216   1
   8   4   5 233.560 15.5576  -2
  -8   4   8 233.560 15.5576   1
   7   4   6 278.783 29.1953  -2
  -7   4   8 278.783 29.1953   1
   6   4   6 146.810 9.11998  -2
  -6   4   8 146.810 9.11998   1
   5   4   6 489.623 17.7712  -2
  -5   4   8 489.623 17.7712   1
   4   4   7 52.0603 10.3950  -2
  -4   4   8 52.0603 10.3950   1
   3   4   7 837.844 36.0439  -2
  -3   4   8 837.844 36.0439   1
   2   4   7 -408.42 728.806  -2
  -2   4   8 -408.42 728.806   1
   1   4   8 592.487 26.7948  -2
  -1   4   8 592.487 26.7948   1
   0   4   8 -253.41 326.554  -2
   0   4   8 -253.41 326.554   1
  -1   4   8 672.523 27.6640  -2
   1   4   8 672.523 27.6640   1
  -2   4   9 279.371 14.7729  -2
   2   4   8 279.371 14.7729   1
  -3   4   9 593.631 24.5457  -2
   3   4   8 593.631 24.5457   1
  -4   4   9 287.310 15.1390  -2
   4   4   8 287.310 15.1390   1
  -5   4  10 271.808 16.3259  -2
   5   4   8 271.808 16.3259   1
  -6   4  10 2078.60 807.887  -2
   6   4   8 2078.60 807.887   1
  -7   4  10 -706.63 767.287  -2
   7   4   8 -706.63 767.287   1
  -8   4  11 155.317 23.1027  -2
   8   4   8 155.317 23.1027   1
  -9   4  11 150.419 17.9536  -2
   9   4   8 150.419 17.9536   1
  11   5   4 234.878 44.5578  -2
 -11   5   8 234.878 44.5578   1
  10   5   5 57.2280 36.6877  -2
 -10   5   8 57.2280 36.6877   1
   9   5   5 -115.41 31.9075  -2
  -9   5   8 -115.41 31.9075   1
   8   5   5 95.3882 30.3509  -2
  -8   5   8 95.3882 30.3509   1
   7   5   6 19.6335 1374.24  -2
  -7   5   8 19.6335 1374.24   1
   6   5   6 462.047 17.7030  -2
  -6   5   8 462.047 17.7030   1
   5   5   6 73.1136 29.4311  -2
  -5   5   8 73.1136 29.4311   1
   4   5   7 309.340 19.1646  -2
  -4   5   8 309.340 19.1646   1
   3   5   7 133.188 12.5282  -2
  -3   5   8 133.188 12.5282   1
   2   5   7 306.122 21.1809  -2
  -2   5   8 306.122 21.1809   1
   1   5   8 328.820 44.2162  -2
  -1   5   8 328.820 44.2162   1
   0   5   8 242.317 14.6696  -2
   0   5   8 242.317 14.6696   1
  -1   5   8 29.9004 25.8002  -2
   1   5   8 29.9004 25.8002   1
  -2   5   9 189.545 17.2817  -2
   2   5   8 189.545 17.2817   1
  -3   5   9 296.444 14.4849  -2
   3   5   8 296.444 14.4849   1
  -4   5   9 355.711 15.4749  -2
   4   5   8 355.711 15.4749   1
  -5   5  10 302.963 23.5442  -2
   5   5   8 302.963 23.5442   1
  -6   5  10 164.300 13.4214  -2
   6   5   8 164.300 13.4214   1
  -7   5  10 274.943 37.6373  -2
   7   5   8 274.943 37.6373   1
  -8   5  11 169.528 36.3359  -2
   8   5   8 169.528 36.3359   1
  -9   5  11 64.6582 33.0690  -2
   9   5   8 64.6582 33.0690   1
  10   6   5 837.902 140.179  -2
 -10   6   8 837.902 140.179   1
   9   6   5 323.303 43.8792  -2
  -9   6   8 323.303 43.8792   1
   8   6   5 388.456 70.3073  -2
  -8   6   8 388.456 70.3073   1
   6   6   6 296.005 15.8934  -2
  -6   6   8 296.005 15.8934   1
   5   6   6 413.617 19.7849  -2
  -5   6   8 413.617 19.7849   1
   4   6   7 1748.40 695.360  -2
  -4   6   8 1748.40 695.360   1
   3   6   7 142.032 11.8219  -2
  -3   6   8 142.032 11.8219   1
   2   6   7 1397.95 984.168  -2
  -2   6   8 1397.95 984.168   1
   1   6   8 -876.70 681.925  -2
  -1   6   8 -876.70 681.925   1
   0   6   8 133.196 12.6395  -2
   0   6   8 133.196 12.6395   1
  -1   6   8 1033.92 28.6315  -2
   1   6   8 1033.92 28.6315   1
  -2   6   9 477.200 24.5656  -2
   2   6   8 477.200 24.5656   1
  -3   6   9 264.280 16.6350  -2
   3   6   8 264.280 16.6350   1
  -4   6   9 296.568 25.2957  -2
   4   6   8 296.568 25.2957   1
  -5   6  10 103.718 25.9625  -2
   5   6   8 103.718 25.9625   1
  -6   6  10 44.4131 15.1127  -2
   6   6   8 44.4131 15.1127   1
   8   6   8 -0.3433 57.3491   1
   8   7   5 348.011 82.1833  -2
  -8   7   8 348.011 82.1833   1
   6   7   6 157.897 14.5919  -2
  -6   7   8 157.897 14.5919   1
   5   7   6 308.373 23.3962  -2
  -5   7   8 308.373 23.3962   1
   4   7   7 42.9424 21.6850  -2
  -4   7   8 42.9424 21.6850   1
   3   7   7 136.969 11.8016  -2
  -3   7   8 136.969 11.8016   1
   2   7   7 34.1533 23.0154  -2
  -2   7   8 34.1533 23.0154   1
   1   7   8 120.092 21.8238  -2
  -1   7   8 120.092 21.8238   1
   0   7   8 45.5729 11.3450  -2
   0   7   8 45.5729 11.3450   1
  -1   7   8 148.396 24.2708  -2
   1   7   8 148.396 24.2708   1
  -2   7   9 340.621 25.7225  -2
   2   7   8 340.621 25.7225   1
  -3   7   9 47.7200 10.7331  -2
   3   7   8 47.7200 10.7331   1
  -4   7   9 329.859 34.6341  -2
   4   7   8 329.859 34.6341   1
  -5   7  10 70.2374 43.0117  -2
   5   7   8 70.2374 43.0117   1
  -6   7  10 243.578 30.6995  -2
   6   7   8 243.578 30.6995   1
   5   8   6 122.263 27.3851  -2
  -5   8   8 122.263 27.3851   1
   4   8   7 329.570 27.7437  -2
  -4   8   8 329.570 27.7437   1
   3   8   7 55.3058 13.4438  -2
  -3   8   8 55.3058 13.4438   1
   2   8   7 367.467 31.6015  -2
  -2   8   8 367.467 31.6015   1
   1   8   8 162.636 38.5954  -2
  -1   8   8 162.636 38.5954   1
   0   8   8 694.887 38.0703  -2
   0   8   8 694.887 38.0703   1
  -1   8   8 40.3066 37.4047  -2
   1   8   8 40.3066 37.4047   1
  -2   8   9 255.163 44.8863  -2
   2   8   8 255.163 44.8863   1
  -3   8   9 52.8776 15.1510  -2
   3   8   8 52.8776 15.1510   1
  12   0   5 371.898 51.2545  -2
 -12   0   9 371.898 51.2545   1
  10   0   6 1288.71 105.260  -2
 -10   0   9 1288.71 105.260   1
   9   0   6 -34.431 10.6098  -2
  -9   0   9 -34.431 10.6098   1
   8   0   6 740.978 45.4012  -2
  -8   0   9 740.978 45.4012   1
   7   0   7 15.5905 13.4287  -2
  -7   0   9 15.5905 13.4287   1
   6   0   7 1024.63 62.7455  -2
  -6   0   9 1024.63 62.7455   1
   4   0   8 1016.42 83.5921  -2
  -4   0   9 1016.42 83.5921   1
   3   0   8 3.10043 4.95373  -2
  -3   0   9 3.10043 4.95373   1
   2   0   8 336.653 18.6369  -2
  -2   0   9 336.653 18.6369   1
   1   0   9 1.89897 318.066  -2
  -1   0   9 1.89897 318.066   1
   0   0   9 550.709 226.596  -2
   0   0   9 550.709 226.596   1
  -1   0   9 86.1012 310.835  -2
   1   0   9 86.1012 310.835   1
  -2   0  10 196.788 14.5362  -2
   2   0   9 196.788 14.5362   1
  -3   0  10 184.562 221.006  -2
   3   0   9 184.562 221.006   1
  -4   0  10 188.593 15.2612  -2
   4   0   9 188.593 15.2612   1
  -5   0  11 44.3828 18.7738  -2
   5   0   9 44.3828 18.7738   1
  -6   0  11 346.982 15.8801  -2
   6   0   9 346.982 15.8801   1
  -7   0  11 -23.956 20.8086  -2
   7   0   9 -23.956 20.8086   1
  -8   0  12 325.871 43.9381  -2
   8   0   9 325.871 43.9381   1
  -9   0  12 118.018 45.6750  -2
   9   0   9 118.018 45.6750   1
 -10   0  12 363.307 54.1849  -2
  10   0   9 363.307 54.1849   1
 -11   0  13 22.4529 43.4423  -2
  11   0   9 22.4529 43.4423   1
  12   1   5 109.825 20.1348  -2
 -12   1   9 109.825 20.1348   1
  11   1   5 308.406 31.4755  -2
 -11   1   9 308.406 31.4755   1
  10   1   6 334.568 33.6829  -2
 -10   1   9 334.568 33.6829   1
   9   1   6 41.3880 10.2539  -2
  -9   1   9 41.3880 10.2539   1
   8   1   6 592.665 333.625  -2
  -8   1   9 592.665 333.625   1
   7   1   7 270.821 247.186  -2
  -7   1   9 270.821 247.186   1
   6   1   7 250.305 11.2529  -2
  -6   1   9 250.305 11.2529   1
   5   1   7 325.787 11.8289  -2
  -5   1   9 325.787 11.8289   1
   4   1   8 973.256 35.2353  -2
  -4   1   9 973.256 35.2353   1
   3   1   8 -97.764 12.6699  -2
  -3   1   9 -97.764 12.6699   1
   2   1   8 165.961 15.1077  -2
  -2   1   9 165.961 15.1077   1
   1   1   9 105.148 340.627  -2
  -1   1   9 105.148 340.627   1
   0   1   9 88.3396 9.36232  -2
   0   1   9 88.3396 9.36232   1
  -1   1   9 26.5995 11.2698  -2
   1   1   9 26.5995 11.2698   1
  -2   1  10 702.923 26.8996  -2
   2   1   9 702.923 26.8996   1
  -3   1  10 441.413 15.6844  -2
   3   1   9 441.413 15.6844   1
  -4   1  10 1058.63 43.1137  -2
   4   1   9 1058.63 43.1137   1
  -5   1  11 466.320 15.4181  -2
   5   1   9 466.320 15.4181   1
  -6   1  11 412.106 19.6460  -2
   6   1   9 412.106 19.6460   1
  -7   1  11 80.0846 18.6307  -2
   7   1   9 80.0846 18.6307   1
  -8   1  12 387.178 21.6998  -2
   8   1   9 387.178 21.6998   1
  -9   1  12 93.1173 13.6836  -2
   9   1   9 93.1173 13.6836   1
 -10   1  12 162.942 26.4449  -2
  10   1   9 162.942 26.4449   1
 -11   1  13 56.9710 30.8069  -2
  11   1   9 56.9710 30.8069   1
  12   2   5 193.324 22.7458  -2
 -12   2   9 193.324 22.7458   1
   9   2   6 472.700 35.4376  -2
  -9   2   9 472.700 35.4376   1
   8   2   6 175.795 20.8577  -2
  -8   2   9 175.795 20.8577   1
   7   2   7 631.748 32.7548  -2
  -7   2   9 631.748 32.7548   1
   6   2   7 376.330 12.9951  -2
  -6   2   9 376.330 12.9951   1
   5   2   7 844.790 29.8224  -2
  -5   2   9 844.790 29.8224   1
   4   2   8 526.177 15.9968  -2
  -4   2   9 526.177 15.9968   1
   3   2   8 351.200 14.9557  -2
  -3   2   9 351.200 14.9557   1
   2   2   8 -41.269 155.548  -2
  -2   2   9 -41.269 155.548   1
   1   2   9 13.0480 9.92952  -2
  -1   2   9 13.0480 9.92952   1
   0   2   9 -49.966 4.03584  -2
   0   2   9 -49.966 4.03584   1
  -1   2   9 457.027 184.244  -2
   1   2   9 457.027 184.244   1
  -2   2  10 459.620 246.508  -2
   2   2   9 459.620 246.508   1
  -3   2  10 285.761 12.4595  -2
   3   2   9 285.761 12.4595   1
  -4   2  10 280.166 326.395  -2
   4   2   9 280.166 326.395   1
  -5   2  11 255.808 14.6209  -2
   5   2   9 255.808 14.6209   1
  -6   2  11 176.722 9.07102  -2
   6   2   9 176.722 9.07102   1
  -7   2  11 -509.16 721.197  -2
   7   2   9 -509.16 721.197   1
  -8   2  12 109.285 17.8346  -2
   8   2   9 109.285 17.8346   1
  -9   2  12 277.887 16.5474  -2
   9   2   9 277.887 16.5474   1
 -10   2  12 56.9814 29.7822  -2
  10   2   9 56.9814 29.7822   1
  11   2   9 112.953 15.6462   1
  12   3   5 128.248 19.9187  -2
 -12   3   9 128.248 19.9187   1
   9   3   6 61.5277 12.1456  -2
  -9   3   9 61.5277 12.1456   1
   8   3   6 -206.02 15.9292  -2
  -8   3   9 -206.02 15.9292   1
   7   3   7 147.216 15.1228  -2
  -7   3   9 147.216 15.1228   1
   6   3   7 -88.935 14.9671  -2
  -6   3   9 -88.935 14.9671   1
   5   3   7 318.027 13.2676  -2
  -5   3   9 318.027 13.2676   1
   4   3   8 219.123 11.9496  -2
  -4   3   9 219.123 11.9496   1
   3   3   8 482.217 25.6374  -2
  -3   3   9 482.217 25.6374   1
   2   3   8 268.646 15.6914  -2
  -2   3   9 268.646 15.6914   1
   1   3   9 248.334 11.3934  -2
  -1   3   9 248.334 11.3934   1
   0   3   9 246.231 15.7162  -2
   0   3   9 246.231 15.7162   1
  -1   3   9 374.289 11.6524  -2
   1   3   9 374.289 11.6524   1
  -2   3  10 674.369 24.9086  -2
   2   3   9 674.369 24.9086   1
  -3   3  10 821.759 28.6778  -2
   3   3   9 821.759 28.6778   1
  -4   3  10 197.200 12.1746  -2
   4   3   9 197.200 12.1746   1
  -5   3  11 598.517 25.8696  -2
   5   3   9 598.517 25.8696   1
  -6   3  11 116.322 9.57819  -2
   6   3   9 116.322 9.57819   1
  -7   3  11 471.861 27.1282  -2
   7   3   9 471.861 27.1282   1
  -8   3  12 29.4212 20.6072  -2
   8   3   9 29.4212 20.6072   1
  -9   3  12 294.811 18.0525  -2
   9   3   9 294.811 18.0525   1
 -10   3  12 21.9168 47.6456  -2
  10   3   9 21.9168 47.6456   1
  12   4   5 56.4869 20.1159  -2
 -12   4   9 56.4869 20.1159   1
  11   4   5 558.402 60.5179  -2
 -11   4   9 558.402 60.5179   1
  10   4   6 58.4988 66.4871  -2
 -10   4   9 58.4988 66.4871   1
   9   4   6 311.110 20.1557  -2
  -9   4   9 311.110 20.1557   1
   8   4   6 680.870 308.650  -2
  -8   4   9 680.870 308.650   1
   7   4   7 -455.03 246.699  -2
  -7   4   9 -455.03 246.699   1
   6   4   7 -9.1677 20.0115  -2
  -6   4   9 -9.1677 20.0115   1
   5   4   7 193.702 21.8639  -2
  -5   4   9 193.702 21.8639   1
   4   4   8 188.326 22.8857  -2
  -4   4   9 188.326 22.8857   1
   3   4   8 507.510 18.0631  -2
  -3   4   9 507.510 18.0631   1
   2   4   8 306.133 20.4519  -2
  -2   4   9 306.133 20.4519   1
   1   4   9 -444.38 693.328  -2
  -1   4   9 -444.38 693.328   1
   0   4   9 203.977 9.26984  -2
   0   4   9 203.977 9.26984   1
  -1   4   9 32.8741 13.7880  -2
   1   4   9 32.8741 13.7880   1
  -2   4  10 -76.358 14.2450  -2
   2   4   9 -76.358 14.2450   1
  -3   4  10 26.9696 6.41428  -2
   3   4   9 26.9696 6.41428   1
  -4   4  10 63.2564 13.7939  -2
   4   4   9 63.2564 13.7939   1
  -5   4  11 135.478 15.5896  -2
   5   4   9 135.478 15.5896   1
  -6   4  11 133.792 13.5775  -2
   6   4   9 133.792 13.5775   1
  -7   4  11 1524.65 898.946  -2
   7   4   9 1524.65 898.946   1
  -8   4  12 121.336 25.1272  -2
   8   4   9 121.336 25.1272   1
  -9   4  12 146.124 19.5870  -2
   9   4   9 146.124 19.5870   1
 -11   5   9 3.35008 56.6409   1
   9   5   6 102.300 15.9790  -2
  -9   5   9 102.300 15.9790   1
   8   5   6 1248.72 806.139  -2
  -8   5   9 1248.72 806.139   1
   7   5   7 -98.826 727.181  -2
  -7   5   9 -98.826 727.181   1
   6   5   7 -104.99 33.7355  -2
  -6   5   9 -104.99 33.7355   1
   5   5   7 14.5611 16.1066  -2
  -5   5   9 14.5611 16.1066   1
   4   5   8 81.5115 17.4958  -2
  -4   5   9 81.5115 17.4958   1
   3   5   8 451.980 19.2768  -2
  -3   5   9 451.980 19.2768   1
   2   5   8 152.730 14.9165  -2
  -2   5   9 152.730 14.9165   1
   1   5   9 878.549 46.1583  -2
  -1   5   9 878.549 46.1583   1
   0   5   9 139.099 10.7418  -2
   0   5   9 139.099 10.7418   1
  -1   5   9 1213.45 39.8241  -2
   1   5   9 1213.45 39.8241   1
  -2   5  10 658.214 19.9738  -2
   2   5   9 658.214 19.9738   1
  -3   5  10 749.021 29.9420  -2
   3   5   9 749.021 29.9420   1
  -4   5  10 505.972 20.7140  -2
   4   5   9 505.972 20.7140   1
  -5   5  11 234.717 20.0297  -2
   5   5   9 234.717 20.0297   1
  -6   5  11 186.861 15.0356  -2
   6   5   9 186.861 15.0356   1
  -7   5  11 245.172 29.1944  -2
   7   5   9 245.172 29.1944   1
  -8   5  12 67.1524 90.5412  -2
   8   5   9 67.1524 90.5412   1
   8   6   6 223.448 80.4170  -2
  -8   6   9 223.448 80.4170   1
   7   6   7 127.018 35.6533  -2
  -7   6   9 127.018 35.6533   1
   6   6   7 295.431 17.7908  -2
  -6   6   9 295.431 17.7908   1
   4   6   8 1514.11 807.573  -2
  -4   6   9 1514.11 807.573   1
   3   6   8 488.818 21.5777  -2
  -3   6   9 488.818 21.5777   1
   2   6   8 1225.66 792.000  -2
  -2   6   9 1225.66 792.000   1
   1   6   9 237.889 31.7795  -2
  -1   6   9 237.889 31.7795   1
   0   6   9 -246.43 33.8208  -2
   0   6   9 -246.43 33.8208   1
  -1   6   9 155.852 21.6915  -2
   1   6   9 155.852 21.6915   1
  -2   6  10 148.941 18.4565  -2
   2   6   9 148.941 18.4565   1
  -3   6  10 79.5996 10.3667  -2
   3   6   9 79.5996 10.3667   1
  -4   6  10 143.135 23.1766  -2
   4   6   9 143.135 23.1766   1
  -5   6  11 128.080 33.3213  -2
   5   6   9 128.080 33.3213   1
  -6   6  11 74.8230 20.6649  -2
   6   6   9 74.8230 20.6649   1
   6   7   7 79.9819 13.1557  -2
  -6   7   9 79.9819 13.1557   1
   5   7   7 125.911 26.1150  -2
  -5   7   9 125.911 26.1150   1
   4   7   8 167.909 33.7616  -2
  -4   7   9 167.909 33.7616   1
   3   7   8 57.4838 10.2399  -2
  -3   7   9 57.4838 10.2399   1
   2   7   8 368.552 30.0486  -2
  -2   7   9 368.552 30.0486   1
   1   7   9 345.531 32.3513  -2
  -1   7   9 345.531 32.3513   1
   0   7   9 519.563 32.8492  -2
   0   7   9 519.563 32.8492   1
  -1   7   9 288.452 25.5851  -2
   1   7   9 288.452 25.5851   1
  -2   7  10 557.679 33.7502  -2
   2   7   9 557.679 33.7502   1
  -3   7  10 96.2673 11.9009  -2
   3   7   9 96.2673 11.9009   1
  -4   7  10 281.695 41.7152  -2
   4   7   9 281.695 41.7152   1
   5   7   9 72.3797 21.0477   1
   3   8   8 201.829 23.3856  -2
  -3   8   9 201.829 23.3856   1
   2   8   8 129.934 71.5186  -2
  -2   8   9 129.934 71.5186   1
  -1   8   9 74.7609 15.4111   1
   0   8   9 212.092 22.8283  -2
   0   8   9 212.092 22.8283   1
  12   0   6 203.357 35.3201  -2
 -12   0  10 203.357 35.3201   1
  10   0   7 817.965 69.3734  -2
 -10   0  10 817.965 69.3734   1
   9   0   7 27.3157 11.2130  -2
  -9   0  10 27.3157 11.2130   1
   8   0   7 449.970 41.7599  -2
  -8   0  10 449.970 41.7599   1
   6   0   8 149.066 14.5041  -2
  -6   0  10 149.066 14.5041   1
   5   0   8 -20.544 17.0294  -2
  -5   0  10 -20.544 17.0294   1
   4   0   9 204.530 22.2154  -2
  -4   0  10 204.530 22.2154   1
   3   0   9 -3.1434 8.70117  -2
  -3   0  10 -3.1434 8.70117   1
   2   0   9 -56.746 191.210  -2
  -2   0  10 -56.746 191.210   1
   1   0  10 -245.36 382.244  -2
  -1   0  10 -245.36 382.244   1
   0   0  10 147.400 13.7697  -2
   0   0  10 147.400 13.7697   1
  -1   0  10 145.774 371.714  -2
   1   0  10 145.774 371.714   1
  -2   0  11 343.951 30.1351  -2
   2   0  10 343.951 30.1351   1
  -3   0  11 27.3603 6.86542  -2
   3   0  10 27.3603 6.86542   1
  -4   0  11 804.395 53.7071  -2
   4   0  10 804.395 53.7071   1
  -5   0  12 244.441 590.983  -2
   5   0  10 244.441 590.983   1
  -6   0  12 529.846 31.3652  -2
   6   0  10 529.846 31.3652   1
  -7   0  12 43.8093 23.7804  -2
   7   0  10 43.8093 23.7804   1
  -8   0  13 182.892 40.9874  -2
   8   0  10 182.892 40.9874   1
  -9   0  13 -18.316 47.8440  -2
   9   0  10 -18.316 47.8440   1
 -10   0  13 100.476 51.3353  -2
  10   0  10 100.476 51.3353   1
  12   1   6 226.841 27.5835  -2
 -12   1  10 226.841 27.5835   1
   9   1   7 235.277 17.5350  -2
  -9   1  10 235.277 17.5350   1
   8   1   7 517.719 37.2087  -2
  -8   1  10 517.719 37.2087   1
   7   1   8 232.793 13.8971  -2
  -7   1  10 232.793 13.8971   1
   6   1   8 807.357 23.1033  -2
  -6   1  10 807.357 23.1033   1
   5   1   8 579.431 18.2490  -2
  -5   1  10 579.431 18.2490   1
   4   1   9 1169.69 41.0789  -2
  -4   1  10 1169.69 41.0789   1
   3   1   9 429.861 13.2563  -2
  -3   1  10 429.861 13.2563   1
   2   1   9 437.710 27.3583  -2
  -2   1  10 437.710 27.3583   1
   1   1  10 164.965 13.0113  -2
  -1   1  10 164.965 13.0113   1
   0   1  10 667.427 22.2962  -2
   0   1  10 667.427 22.2962   1
  -1   1  10 675.316 338.579  -2
   1   1  10 675.316 338.579   1
  -2   1  11 413.652 25.2405  -2
   2   1  10 413.652 25.2405   1
  -3   1  11 583.791 17.7818  -2
   3   1  10 583.791 17.7818   1
  -4   1  11 518.888 22.8446  -2
   4   1  10 518.888 22.8446   1
  -5   1  12 117.261 14.0499  -2
   5   1  10 117.261 14.0499   1
  -6   1  12 36.6644 7.79341  -2
   6   1  10 36.6644 7.79341   1
  -7   1  12 -5.4624 17.5977  -2
   7   1  10 -5.4624 17.5977   1
  -8   1  13 23.3827 22.3369  -2
   8   1  10 23.3827 22.3369   1
  -9   1  13 12.6306 15.2541  -2
   9   1  10 12.6306 15.2541   1
 -10   1  13 -49.253 54.0853  -2
  10   1  10 -49.253 54.0853   1
  12   2   6 14.2037 30.1856  -2
 -12   2  10 14.2037 30.1856   1
   9   2   7 164.594 13.0279  -2
  -9   2  10 164.594 13.0279   1
   8   2   7 64.2557 17.4490  -2
  -8   2  10 64.2557 17.4490   1
   7   2   8 690.232 276.901  -2
  -7   2  10 690.232 276.901   1
   6   2   8 93.8779 8.12992  -2
  -6   2  10 93.8779 8.12992   1
   5   2   8 470.321 14.3095  -2
  -5   2  10 470.321 14.3095   1
   4   2   9 153.710 14.3943  -2
  -4   2  10 153.710 14.3943   1
   3   2   9 286.438 10.5854  -2
  -3   2  10 286.438 10.5854   1
   2   2   9 65.2292 25.9734  -2
  -2   2  10 65.2292 25.9734   1
   1   2  10 525.282 210.075  -2
  -1   2  10 525.282 210.075   1
   0   2  10 7.07687 4.33080  -2
   0   2  10 7.07687 4.33080   1
  -1   2  10 177.756 12.4041  -2
   1   2  10 177.756 12.4041   1
  -2   2  11 206.464 11.6923  -2
   2   2  10 206.464 11.6923   1
  -3   2  11 310.792 14.8328  -2
   3   2  10 310.792 14.8328   1
  -4   2  11 276.229 12.0185  -2
   4   2  10 276.229 12.0185   1
  -5   2  12 468.102 21.1801  -2
   5   2  10 468.102 21.1801   1
  -6   2  12 172.654 11.8962  -2
   6   2  10 172.654 11.8962   1
  -7   2  12 229.772 21.9190  -2
   7   2  10 229.772 21.9190   1
  -8   2  13 193.087 21.0210  -2
   8   2  10 193.087 21.0210   1
  -9   2  13 127.816 16.8376  -2
   9   2  10 127.816 16.8376   1
 -10   2  13 146.154 41.6290  -2
  10   2  10 146.154 41.6290   1
  12   3   6 219.751 31.5466  -2
 -12   3  10 219.751 31.5466   1
   9   3   7 460.044 25.2031  -2
  -9   3  10 460.044 25.2031   1
   8   3   7 89.9361 21.1933  -2
  -8   3  10 89.9361 21.1933   1
   7   3   8 892.170 39.9092  -2
  -7   3  10 892.170 39.9092   1
   6   3   8 3.76930 8.11594  -2
  -6   3  10 3.76930 8.11594   1
   5   3   8 1109.07 34.5568  -2
  -5   3  10 1109.07 34.5568   1
   4   3   9 176.456 12.2858  -2
  -4   3  10 176.456 12.2858   1
   3   3   9 1012.96 31.8468  -2
  -3   3  10 1012.96 31.8468   1
   2   3   9 212.138 21.5661  -2
  -2   3  10 212.138 21.5661   1
   1   3  10 502.631 22.9729  -2
  -1   3  10 502.631 22.9729   1
   0   3  10 50.2618 7.16107  -2
   0   3  10 50.2618 7.16107   1
  -1   3  10 354.954 17.0437  -2
   1   3  10 354.954 17.0437   1
  -2   3  11 657.434 327.512  -2
   2   3  10 657.434 327.512   1
  -3   3  11 386.924 21.7099  -2
   3   3  10 386.924 21.7099   1
  -4   3  11 2002.30 1092.13  -2
   4   3  10 2002.30 1092.13   1
  -5   3  12 409.406 17.6791  -2
   5   3  10 409.406 17.6791   1
  -6   3  12 558.755 344.957  -2
   6   3  10 558.755 344.957   1
  -7   3  12 85.5606 26.0656  -2
   7   3  10 85.5606 26.0656   1
  -8   3  13 37.8966 20.8451  -2
   8   3  10 37.8966 20.8451   1
  -9   3  13 42.1336 16.0328  -2
   9   3  10 42.1336 16.0328   1
  11   4   6 226.163 63.8217  -2
 -11   4  10 226.163 63.8217   1
   9   4   7 132.625 15.4726  -2
  -9   4  10 132.625 15.4726   1
   8   4   7 69.8001 15.3215  -2
  -8   4  10 69.8001 15.3215   1
   7   4   8 233.197 36.1902  -2
  -7   4  10 233.197 36.1902   1
   6   4   8 205.590 11.4400  -2
  -6   4  10 205.590 11.4400   1
   5   4   8 191.716 14.0704  -2
  -5   4  10 191.716 14.0704   1
   4   4   9 458.940 275.821  -2
  -4   4  10 458.940 275.821   1
   3   4   9 78.3725 6.94464  -2
  -3   4  10 78.3725 6.94464   1
   2   4   9 -42.975 42.3491  -2
  -2   4  10 -42.975 42.3491   1
   1   4  10 -48.636 27.8045  -2
  -1   4  10 -48.636 27.8045   1
   0   4  10 308.194 13.4571  -2
   0   4  10 308.194 13.4571   1
  -1   4  10 -176.84 10.6258  -2
   1   4  10 -176.84 10.6258   1
  -2   4  11 521.566 20.6355  -2
   2   4  10 521.566 20.6355   1
  -3   4  11 224.032 16.4483  -2
   3   4  10 224.032 16.4483   1
  -4   4  11 137.243 17.3543  -2
   4   4  10 137.243 17.3543   1
  -5   4  12 275.793 21.6439  -2
   5   4  10 275.793 21.6439   1
  -6   4  12 69.3531 15.6397  -2
   6   4  10 69.3531 15.6397   1
  -7   4  12 406.182 35.2994  -2
   7   4  10 406.182 35.2994   1
  -8   4  13 63.2822 80.4425  -2
   8   4  10 63.2822 80.4425   1
  -9   4  13 195.919 46.2387  -2
   9   4  10 195.919 46.2387   1
  10   5   7 -89.941 87.9661  -2
 -10   5  10 -89.941 87.9661   1
   9   5   7 61.0933 16.7629  -2
  -9   5  10 61.0933 16.7629   1
   6   5   8 306.431 14.8201  -2
  -6   5  10 306.431 14.8201   1
   5   5   8 -392.90 1364.88  -2
  -5   5  10 -392.90 1364.88   1
   4   5   9 339.802 30.3392  -2
  -4   5  10 339.802 30.3392   1
   3   5   9 630.730 32.8345  -2
  -3   5  10 630.730 32.8345   1
   2   5   9 409.573 21.7936  -2
  -2   5  10 409.573 21.7936   1
   1   5  10 -484.45 1053.65  -2
  -1   5  10 -484.45 1053.65   1
   0   5  10 62.0463 7.09216  -2
   0   5  10 62.0463 7.09216   1
  -1   5  10 -113.83 355.697  -2
   1   5  10 -113.83 355.697   1
  -2   5  11 -246.45 34.8417  -2
   2   5  10 -246.45 34.8417   1
  -3   5  11 118.961 9.80262  -2
   3   5  10 118.961 9.80262   1
  -4   5  11 237.429 21.4082  -2
   4   5  10 237.429 21.4082   1
  -5   5  12 186.976 28.5146  -2
   5   5  10 186.976 28.5146   1
  -6   5  12 120.202 14.8076  -2
   6   5  10 120.202 14.8076   1
  -7   5  12 223.903 59.7675  -2
   7   5  10 223.903 59.7675   1
   9   6   7 387.706 84.4337  -2
  -9   6  10 387.706 84.4337   1
   8   6   7 42.3969 86.9093  -2
  -8   6  10 42.3969 86.9093   1
   7   6   8 73.1739 36.2000  -2
  -7   6  10 73.1739 36.2000   1
   6   6   8 71.3631 11.1036  -2
  -6   6  10 71.3631 11.1036   1
   5   6   8 25.8623 28.8072  -2
  -5   6  10 25.8623 28.8072   1
   4   6   9 63.8257 28.5718  -2
  -4   6  10 63.8257 28.5718   1
   3   6   9 -56.014 17.9859  -2
  -3   6  10 -56.014 17.9859   1
   2   6   9 115.221 21.6845  -2
  -2   6  10 115.221 21.6845   1
   1   6  10 396.812 33.1395  -2
  -1   6  10 396.812 33.1395   1
   0   6  10 29.9800 8.37657  -2
   0   6  10 29.9800 8.37657   1
  -1   6  10 310.367 23.8438  -2
   1   6  10 310.367 23.8438   1
  -2   6  11 249.750 30.6671  -2
   2   6  10 249.750 30.6671   1
  -3   6  11 157.052 14.2447  -2
   3   6  10 157.052 14.2447   1
  -4   6  11 228.838 27.1577  -2
   4   6  10 228.838 27.1577   1
  -5   6  12 253.999 49.2509  -2
   5   6  10 253.999 49.2509   1
  -6   6  12 128.892 25.8739  -2
   6   6  10 128.892 25.8739   1
   6   7   8 285.121 21.6133  -2
  -6   7  10 285.121 21.6133   1
   3   7   9 111.773 13.6966  -2
  -3   7  10 111.773 13.6966   1
   2   7   9 666.552 74.4853  -2
  -2   7  10 666.552 74.4853   1
   1   7  10 331.009 56.3371  -2
  -1   7  10 331.009 56.3371   1
   0   7  10 318.290 21.9097  -2
   0   7  10 318.290 21.9097   1
  -1   7  10 154.850 23.3170  -2
   1   7  10 154.850 23.3170   1
  -2   7  11 97.5964 30.1126  -2
   2   7  10 97.5964 30.1126   1
  -3   7  11 63.8638 15.2924  -2
   3   7  10 63.8638 15.2924   1
   9   0   8 23.4882 18.9063  -2
  -9   0  11 23.4882 18.9063   1
   8   0   8 498.672 49.3351  -2
  -8   0  11 498.672 49.3351   1
   7   0   9 46.0200 20.8057  -2
  -7   0  11 46.0200 20.8057   1
   6   0   9 564.151 37.1840  -2
  -6   0  11 564.151 37.1840   1
   5   0   9 2.47577 14.7611  -2
  -5   0  11 2.47577 14.7611   1
   4   0  10 543.436 30.3585  -2
  -4   0  11 543.436 30.3585   1
   3   0  10 -1.1640 7.63536  -2
  -3   0  11 -1.1640 7.63536   1
   2   0  10 499.396 26.9530  -2
  -2   0  11 499.396 26.9530   1
   1   0  11 382.230 434.267  -2
  -1   0  11 382.230 434.267   1
   0   0  11 1089.22 49.6647  -2
   0   0  11 1089.22 49.6647   1
  -1   0  11 616.178 419.614  -2
   1   0  11 616.178 419.614   1
  -2   0  12 700.046 40.6084  -2
   2   0  11 700.046 40.6084   1
  -3   0  12 796.913 332.841  -2
   3   0  11 796.913 332.841   1
  -4   0  12 454.439 42.4761  -2
   4   0  11 454.439 42.4761   1
  -5   0  13 54.2680 34.6060  -2
   5   0  11 54.2680 34.6060   1
  -6   0  13 257.761 25.0071  -2
   6   0  11 257.761 25.0071   1
  -7   0  13 6.34261 35.8643  -2
   7   0  11 6.34261 35.8643   1
  -8   0  14 48.7627 33.2526  -2
   8   0  11 48.7627 33.2526   1
  -9   0  14 -8.6750 23.5087  -2
   9   0  11 -8.6750 23.5087   1
  12   1   7 241.899 45.3496  -2
 -12   1  11 241.899 45.3496   1
   9   1   8 128.900 12.8687  -2
  -9   1  11 128.900 12.8687   1
   8   1   8 336.582 40.5340  -2
  -8   1  11 336.582 40.5340   1
   7   1   9 33.9810 15.5965  -2
  -7   1  11 33.9810 15.5965   1
   6   1   9 220.661 13.9076  -2
  -6   1  11 220.661 13.9076   1
   5   1   9 335.235 13.9221  -2
  -5   1  11 335.235 13.9221   1
   4   1  10 469.662 22.5352  -2
  -4   1  11 469.662 22.5352   1
   3   1  10 265.039 10.6877  -2
  -3   1  11 265.039 10.6877   1
   2   1  10 426.889 20.5882  -2
  -2   1  11 426.889 20.5882   1
   1   1  11 1411.49 318.708  -2
  -1   1  11 1411.49 318.708   1
   0   1  11 -86.655 204.171  -2
   0   1  11 -86.655 204.171   1
  -1   1  11 178.738 12.5752  -2
   1   1  11 178.738 12.5752   1
  -2   1  12 252.450 13.7134  -2
   2   1  11 252.450 13.7134   1
  -3   1  12 232.856 11.5525  -2
   3   1  11 232.856 11.5525   1
  -4   1  12 652.156 242.545  -2
   4   1  11 652.156 242.545   1
  -5   1  13 114.383 17.2337  -2
   5   1  11 114.383 17.2337   1
  -6   1  13 53.9866 8.67575  -2
   6   1  11 53.9866 8.67575   1
  -7   1  13 -23.955 46.4991  -2
   7   1  11 -23.955 46.4991   1
  -8   1  14 58.4492 23.5714  -2
   8   1  11 58.4492 23.5714   1
  -9   1  14 10.9034 19.1903  -2
   9   1  11 10.9034 19.1903   1
  12   2   7 17.8515 38.2540  -2
 -12   2  11 17.8515 38.2540   1
  11   2   7 695.704 64.6831  -2
 -11   2  11 695.704 64.6831   1
   9   2   8 281.241 19.8844  -2
  -9   2  11 281.241 19.8844   1
   8   2   8 186.364 16.7609  -2
  -8   2  11 186.364 16.7609   1
   7   2   9 477.389 34.5120  -2
  -7   2  11 477.389 34.5120   1
   6   2   9 168.027 10.9704  -2
  -6   2  11 168.027 10.9704   1
   5   2   9 629.167 18.5703  -2
  -5   2  11 629.167 18.5703   1
   4   2  10 186.787 21.3175  -2
  -4   2  11 186.787 21.3175   1
   3   2  10 240.307 10.9456  -2
  -3   2  11 240.307 10.9456   1
   2   2  10 226.848 14.1109  -2
  -2   2  11 226.848 14.1109   1
   1   2  11 489.223 16.6151  -2
  -1   2  11 489.223 16.6151   1
   0   2  11 193.445 10.2221  -2
   0   2  11 193.445 10.2221   1
  -1   2  11 637.855 22.0886  -2
   1   2  11 637.855 22.0886   1
  -2   2  12 337.074 19.5601  -2
   2   2  11 337.074 19.5601   1
  -3   2  12 381.369 28.2230  -2
   3   2  11 381.369 28.2230   1
  -4   2  12 151.294 15.6759  -2
   4   2  11 151.294 15.6759   1
  -5   2  13 218.072 18.1379  -2
   5   2  11 218.072 18.1379   1
  -6   2  13 104.699 10.0309  -2
   6   2  11 104.699 10.0309   1
  -7   2  13 -12.471 19.5757  -2
   7   2  11 -12.471 19.5757   1
  -8   2  14 115.040 23.4107  -2
   8   2  11 115.040 23.4107   1
  -9   2  14 42.3115 16.2457  -2
   9   2  11 42.3115 16.2457   1
   9   3   8 257.486 26.6291  -2
  -9   3  11 257.486 26.6291   1
   8   3   8 200.835 35.3774  -2
  -8   3  11 200.835 35.3774   1
   7   3   9 469.668 48.9859  -2
  -7   3  11 469.668 48.9859   1
   6   3   9 137.788 11.4203  -2
  -6   3  11 137.788 11.4203   1
   5   3   9 422.921 27.1846  -2
  -5   3  11 422.921 27.1846   1
   4   3  10 62.4468 21.2919  -2
  -4   3  11 62.4468 21.2919   1
   3   3  10 523.956 19.7544  -2
  -3   3  11 523.956 19.7544   1
   2   3  10 345.434 449.767  -2
  -2   3  11 345.434 449.767   1
   1   3  11 302.874 19.2307  -2
  -1   3  11 302.874 19.2307   1
   0   3  11 65.9489 7.57271  -2
   0   3  11 65.9489 7.57271   1
  -1   3  11 292.908 19.6883  -2
   1   3  11 292.908 19.6883   1
  -2   3  12 144.534 17.8470  -2
   2   3  11 144.534 17.8470   1
  -3   3  12 735.754 478.068  -2
   3   3  11 735.754 478.068   1
  -4   3  12 358.087 17.8439  -2
   4   3  11 358.087 17.8439   1
  -5   3  13 95.9159 19.9862  -2
   5   3  11 95.9159 19.9862   1
  -6   3  13 45.3082 10.7403  -2
   6   3  11 45.3082 10.7403   1
  -7   3  13 20.6482 28.6620  -2
   7   3  11 20.6482 28.6620   1
  -8   3  14 56.7787 37.3290  -2
   8   3  11 56.7787 37.3290   1
   9   4   8 188.650 16.5126  -2
  -9   4  11 188.650 16.5126   1
   8   4   8 292.762 44.2022  -2
  -8   4  11 292.762 44.2022   1
   7   4   9 328.578 47.8071  -2
  -7   4  11 328.578 47.8071   1
   6   4   9 126.455 21.7541  -2
  -6   4  11 126.455 21.7541   1
   5   4   9 267.777 26.9560  -2
  -5   4  11 267.777 26.9560   1
   4   4  10 410.948 19.5557  -2
  -4   4  11 410.948 19.5557   1
   3   4  10 540.421 23.0581  -2
  -3   4  11 540.421 23.0581   1
   2   4  10 428.673 18.3463  -2
  -2   4  11 428.673 18.3463   1
   1   4  11 423.742 24.7351  -2
  -1   4  11 423.742 24.7351   1
   0   4  11 374.294 517.289  -2
   0   4  11 374.294 517.289   1
  -1   4  11 698.354 19.2887  -2
   1   4  11 698.354 19.2887   1
  -2   4  12 182.806 19.6970  -2
   2   4  11 182.806 19.6970   1
  -3   4  12 572.963 17.1217  -2
   3   4  11 572.963 17.1217   1
  -4   4  12 144.538 19.1289  -2
   4   4  11 144.538 19.1289   1
  -5   4  13 265.500 23.9592  -2
   5   4  11 265.500 23.9592   1
  -6   4  13 127.330 13.9158  -2
   6   4  11 127.330 13.9158   1
   8   4  11 4.76152 36.0138   1
   9   5   8 209.571 30.3314  -2
  -9   5  11 209.571 30.3314   1
   8   5   8 126.058 53.3727  -2
  -8   5  11 126.058 53.3727   1
   6   5   9 147.979 17.2364  -2
  -6   5  11 147.979 17.2364   1
   5   5   9 184.277 26.6187  -2
  -5   5  11 184.277 26.6187   1
   4   5  10 2127.61 1019.39  -2
  -4   5  11 2127.61 1019.39   1
   3   5  10 30.0413 10.5211  -2
  -3   5  11 30.0413 10.5211   1
   2   5  10 316.036 23.5889  -2
  -2   5  11 316.036 23.5889   1
   1   5  11 19.4517 59.5065  -2
  -1   5  11 19.4517 59.5065   1
   0   5  11 4.48271 37.7990  -2
   0   5  11 4.48271 37.7990   1
  -1   5  11 382.034 24.4330  -2
   1   5  11 382.034 24.4330   1
  -2   5  12 188.706 17.5250  -2
   2   5  11 188.706 17.5250   1
  -3   5  12 77.6323 13.6601  -2
   3   5  11 77.6323 13.6601   1
  -4   5  12 184.068 22.0196  -2
   4   5  11 184.068 22.0196   1
  -5   5  13 14.0813 65.7181  -2
   5   5  11 14.0813 65.7181   1
  -6   5  13 33.1756 26.4471  -2
   6   5  11 33.1756 26.4471   1
   6   6   9 166.140 20.8588  -2
  -6   6  11 166.140 20.8588   1
   5   6   9 198.821 36.5127  -2
  -5   6  11 198.821 36.5127   1
   4   6  10 288.561 40.9265  -2
  -4   6  11 288.561 40.9265   1
   3   6  10 60.8102 19.4237  -2
  -3   6  11 60.8102 19.4237   1
   2   6  10 329.241 30.8179  -2
  -2   6  11 329.241 30.8179   1
   1   6  11 295.446 54.6151  -2
  -1   6  11 295.446 54.6151   1
   0   6  11 210.023 18.5100  -2
   0   6  11 210.023 18.5100   1
  -1   6  11 35.6376 19.0019  -2
   1   6  11 35.6376 19.0019   1
  -2   6  12 163.117 25.4469  -2
   2   6  11 163.117 25.4469   1
  -3   6  12 112.918 16.2435  -2
   3   6  11 112.918 16.2435   1
  -4   6  12 246.018 35.2678  -2
   4   6  11 246.018 35.2678   1
  -4   7  11 66.0554 17.7858   1
   3   7  10 20.7623 12.9255  -2
  -3   7  11 20.7623 12.9255   1
   0   7  11 0.03656 11.5302  -2
   0   7  11 0.03656 11.5302   1
  -1   7  11 51.8997 36.5604  -2
   1   7  11 51.8997 36.5604   1
  10   0   9 678.654 67.3552  -2
 -10   0  12 678.654 67.3552   1
   9   0   9 10.2023 16.4698  -2
  -9   0  12 10.2023 16.4698   1
   8   0   9 260.720 38.7042  -2
  -8   0  12 260.720 38.7042   1
   7   0  10 34.0538 32.1248  -2
  -7   0  12 34.0538 32.1248   1
   6   0  10 306.077 23.6801  -2
  -6   0  12 306.077 23.6801   1
   5   0  10 -26.313 19.5296  -2
  -5   0  12 -26.313 19.5296   1
   4   0  11 881.928 45.0994  -2
  -4   0  12 881.928 45.0994   1
   3   0  11 7.05637 8.82789  -2
  -3   0  12 7.05637 8.82789   1
   2   0  11 1117.89 65.1856  -2
  -2   0  12 1117.89 65.1856   1
   1   0  12 67.2538 18.1785  -2
  -1   0  12 67.2538 18.1785   1
   0   0  12 1457.70 61.6752  -2
   0   0  12 1457.70 61.6752   1
  -1   0  12 -27.274 23.3010  -2
   1   0  12 -27.274 23.3010   1
  -2   0  13 764.430 40.6230  -2
   2   0  12 764.430 40.6230   1
  -3   0  13 1.10589 9.40240  -2
   3   0  12 1.10589 9.40240   1
  -4   0  13 124.384 32.5220  -2
   4   0  12 124.384 32.5220   1
  -5   0  14 51.7496 26.1950  -2
   5   0  12 51.7496 26.1950   1
  -6   0  14 113.257 26.4545  -2
   6   0  12 113.257 26.4545   1
  -7   0  14 42.7222 40.3863  -2
   7   0  12 42.7222 40.3863   1
  -8   0  15 11.0745 48.1866  -2
   8   0  12 11.0745 48.1866   1
   9   1   9 79.1378 14.0326  -2
  -9   1  12 79.1378 14.0326   1
   8   1   9 237.621 29.8678  -2
  -8   1  12 237.621 29.8678   1
   7   1  10 7.12577 18.8883  -2
  -7   1  12 7.12577 18.8883   1
   6   1  10 55.8272 8.56180  -2
  -6   1  12 55.8272 8.56180   1
   5   1  10 127.502 12.6844  -2
  -5   1  12 127.502 12.6844   1
   4   1  11 19.3768 11.5578  -2
  -4   1  12 19.3768 11.5578   1
   3   1  11 661.580 251.931  -2
  -3   1  12 661.580 251.931   1
   2   1  11 1146.91 750.649  -2
  -2   1  12 1146.91 750.649   1
   1   1  12 180.607 13.0521  -2
  -1   1  12 180.607 13.0521   1
   0   1  12 502.689 19.2051  -2
   0   1  12 502.689 19.2051   1
  -1   1  12 404.029 13.9058  -2
   1   1  12 404.029 13.9058   1
  -2   1  13 435.648 32.3497  -2
   2   1  12 435.648 32.3497   1
  -3   1  13 269.710 15.2263  -2
   3   1  12 269.710 15.2263   1
  -4   1  13 194.092 20.9818  -2
   4   1  12 194.092 20.9818   1
  -5   1  14 127.780 22.2899  -2
   5   1  12 127.780 22.2899   1
  -6   1  14 133.956 12.4370  -2
   6   1  12 133.956 12.4370   1
  -7   1  14 23.3944 36.5021  -2
   7   1  12 23.3944 36.5021   1
  -8   1  15 103.447 31.1254  -2
   8   1  12 103.447 31.1254   1
  11   2   8 494.704 53.6687  -2
 -11   2  12 494.704 53.6687   1
   9   2   9 125.737 16.9844  -2
  -9   2  12 125.737 16.9844   1
   8   2   9 44.0950 43.5404  -2
  -8   2  12 44.0950 43.5404   1
   7   2  10 171.456 29.0740  -2
  -7   2  12 171.456 29.0740   1
   6   2  10 178.878 11.5602  -2
  -6   2  12 178.878 11.5602   1
   5   2  10 366.642 19.1854  -2
  -5   2  12 366.642 19.1854   1
   4   2  11 184.683 14.2931  -2
  -4   2  12 184.683 14.2931   1
   3   2  11 662.113 22.2544  -2
  -3   2  12 662.113 22.2544   1
   2   2  11 305.012 17.8463  -2
  -2   2  12 305.012 17.8463   1
   1   2  12 666.662 30.4123  -2
  -1   2  12 666.662 30.4123   1
   0   2  12 188.847 11.8296  -2
   0   2  12 188.847 11.8296   1
  -1   2  12 978.732 30.0926  -2
   1   2  12 978.732 30.0926   1
  -2   2  13 97.2591 16.9059  -2
   2   2  12 97.2591 16.9059   1
  -3   2  13 171.048 12.5022  -2
   3   2  12 171.048 12.5022   1
  -4   2  13 136.934 19.0909  -2
   4   2  12 136.934 19.0909   1
  -5   2  14 88.9211 18.6503  -2
   5   2  12 88.9211 18.6503   1
  -6   2  14 67.5039 11.6010  -2
   6   2  12 67.5039 11.6010   1
  -7   2  14 79.6597 30.8854  -2
   7   2  12 79.6597 30.8854   1
  -8   2  15 -53.613 50.3048  -2
   8   2  12 -53.613 50.3048   1
   9   3   9 112.175 20.1063  -2
  -9   3  12 112.175 20.1063   1
   8   3   9 55.6479 42.5705  -2
  -8   3  12 55.6479 42.5705   1
   7   3  10 128.014 45.1552  -2
  -7   3  12 128.014 45.1552   1
   6   3  10 57.8877 9.58495  -2
  -6   3  12 57.8877 9.58495   1
   5   3  10 69.3148 19.3256  -2
  -5   3  12 69.3148 19.3256   1
   4   3  11 118.180 16.7832  -2
  -4   3  12 118.180 16.7832   1
   3   3  11 87.5528 9.04541  -2
  -3   3  12 87.5528 9.04541   1
   2   3  11 80.8102 17.0800  -2
  -2   3  12 80.8102 17.0800   1
   1   3  12 273.701 23.5776  -2
  -1   3  12 273.701 23.5776   1
   0   3  12 18.1311 7.17081  -2
   0   3  12 18.1311 7.17081   1
  -1   3  12 351.865 26.1548  -2
   1   3  12 351.865 26.1548   1
  -2   3  13 18.6642 18.9628  -2
   2   3  12 18.6642 18.9628   1
  -3   3  13 289.787 19.8143  -2
   3   3  12 289.787 19.8143   1
  -4   3  13 58.2757 19.8798  -2
   4   3  12 58.2757 19.8798   1
  -5   3  14 194.418 23.9234  -2
   5   3  12 194.418 23.9234   1
  -6   3  14 101.451 14.5857  -2
   6   3  12 101.451 14.5857   1
  -7   3  14 58.1486 56.6065  -2
   7   3  12 58.1486 56.6065   1
   9   4   9 338.344 31.0314  -2
  -9   4  12 338.344 31.0314   1
   7   4  10 367.780 51.3029  -2
  -7   4  12 367.780 51.3029   1
   6   4  10 94.7869 17.0258  -2
  -6   4  12 94.7869 17.0258   1
   5   4  10 385.691 27.7912  -2
  -5   4  12 385.691 27.7912   1
   4   4  11 255.989 26.5980  -2
  -4   4  12 255.989 26.5980   1
   3   4  11 291.567 21.3321  -2
  -3   4  12 291.567 21.3321   1
   2   4  11 489.176 22.7370  -2
  -2   4  12 489.176 22.7370   1
   1   4  12 387.638 24.2478  -2
  -1   4  12 387.638 24.2478   1
   0   4  12 367.130 18.3781  -2
   0   4  12 367.130 18.3781   1
  -1   4  12 377.210 21.5515  -2
   1   4  12 377.210 21.5515   1
  -2   4  13 114.439 20.9840  -2
   2   4  12 114.439 20.9840   1
  -3   4  13 261.322 21.9155  -2
   3   4  12 261.322 21.9155   1
  -4   4  13 101.672 24.8796  -2
   4   4  12 101.672 24.8796   1
  -5   4  14 368.183 48.3431  -2
   5   4  12 368.183 48.3431   1
  -6   4  14 36.5152 18.7119  -2
   6   4  12 36.5152 18.7119   1
   6   5  10 37.3471 13.7897  -2
  -6   5  12 37.3471 13.7897   1
   5   5  10 191.986 36.0325  -2
  -5   5  12 191.986 36.0325   1
   4   5  11 107.243 32.2287  -2
  -4   5  12 107.243 32.2287   1
   3   5  11 105.867 17.1637  -2
  -3   5  12 105.867 17.1637   1
   2   5  11 199.654 24.9164  -2
  -2   5  12 199.654 24.9164   1
   1   5  12 31.7341 26.4093  -2
  -1   5  12 31.7341 26.4093   1
   0   5  12 342.555 18.3552  -2
   0   5  12 342.555 18.3552   1
  -1   5  12 118.997 19.7690  -2
   1   5  12 118.997 19.7690   1
  -2   5  13 236.959 21.3032  -2
   2   5  12 236.959 21.3032   1
  -3   5  13 117.576 14.4708  -2
   3   5  12 117.576 14.4708   1
  -4   5  13 236.316 43.7453  -2
   4   5  12 236.316 43.7453   1
   5   5  12 231.751 27.3209   1
   6   6  10 197.997 28.3394  -2
  -6   6  12 197.997 28.3394   1
   3   6  11 94.5632 15.1327  -2
  -3   6  12 94.5632 15.1327   1
   2   6  11 441.478 64.9861  -2
  -2   6  12 441.478 64.9861   1
   0   6  12 181.776 18.7578  -2
   0   6  12 181.776 18.7578   1
  -1   6  12 67.4366 28.0544  -2
   1   6  12 67.4366 28.0544   1
  -3   6  13 115.169 18.7710  -2
   3   6  12 115.169 18.7710   1
   9   0  10 13.2143 18.5710  -2
  -9   0  13 13.2143 18.5710   1
   8   0  10 132.642 27.2606  -2
  -8   0  13 132.642 27.2606   1
   7   0  11 16.7354 34.2747  -2
  -7   0  13 16.7354 34.2747   1
   6   0  11 188.424 20.7817  -2
  -6   0  13 188.424 20.7817   1
   5   0  11 13.6100 17.3173  -2
  -5   0  13 13.6100 17.3173   1
   4   0  12 227.312 21.4214  -2
  -4   0  13 227.312 21.4214   1
   3   0  12 1.44742 9.35300  -2
  -3   0  13 1.44742 9.35300   1
   2   0  12 310.279 26.5797  -2
  -2   0  13 310.279 26.5797   1
   1   0  13 12.2142 19.2412  -2
  -1   0  13 12.2142 19.2412   1
   0   0  13 213.540 20.0230  -2
   0   0  13 213.540 20.0230   1
  -1   0  13 12.3228 20.8127  -2
   1   0  13 12.3228 20.8127   1
  -2   0  14 196.429 26.3381  -2
   2   0  13 196.429 26.3381   1
  -3   0  14 7.28556 10.6097  -2
   3   0  13 7.28556 10.6097   1
  -4   0  14 325.847 33.7197  -2
   4   0  13 325.847 33.7197   1
  -6   0  15 46.5301 22.7193  -2
   6   0  13 46.5301 22.7193   1
  -7   0  15 0.53182 45.5528  -2
   7   0  13 0.53182 45.5528   1
   9   1  10 33.4234 13.1384  -2
  -9   1  13 33.4234 13.1384   1
   8   1  10 99.4089 26.9181  -2
  -8   1  13 99.4089 26.9181   1
   7   1  11 8.96720 17.6638  -2
  -7   1  13 8.96720 17.6638   1
   6   1  11 138.754 11.4263  -2
  -6   1  13 138.754 11.4263   1
   5   1  11 171.481 15.2229  -2
  -5   1  13 171.481 15.2229   1
   4   1  12 447.312 26.5811  -2
  -4   1  13 447.312 26.5811   1
   3   1  12 341.893 15.2748  -2
  -3   1  13 341.893 15.2748   1
   2   1  12 832.042 36.2942  -2
  -2   1  13 832.042 36.2942   1
   1   1  13 551.038 26.9439  -2
  -1   1  13 551.038 26.9439   1
   0   1  13 975.369 40.6751  -2
   0   1  13 975.369 40.6751   1
  -1   1  13 333.051 21.0776  -2
   1   1  13 333.051 21.0776   1
  -2   1  14 453.662 29.6270  -2
   2   1  13 453.662 29.6270   1
  -3   1  14 38.1488 9.63548  -2
   3   1  13 38.1488 9.63548   1
  -4   1  14 329.040 43.6988  -2
   4   1  13 329.040 43.6988   1
  -5   1  15 78.3230 24.9905  -2
   5   1  13 78.3230 24.9905   1
  -6   1  15 194.114 17.5020  -2
   6   1  13 194.114 17.5020   1
  -7   1  15 64.8003 38.4811  -2
   7   1  13 64.8003 38.4811   1
   9   2  10 76.1153 17.2269  -2
  -9   2  13 76.1153 17.2269   1
   8   2  10 112.368 29.5246  -2
  -8   2  13 112.368 29.5246   1
   7   2  11 69.0817 22.3847  -2
  -7   2  13 69.0817 22.3847   1
   6   2  11 68.9822 10.6462  -2
  -6   2  13 68.9822 10.6462   1
   5   2  11 108.004 17.0387  -2
  -5   2  13 108.004 17.0387   1
   4   2  12 41.4095 18.3362  -2
  -4   2  13 41.4095 18.3362   1
   3   2  12 160.271 11.0590  -2
  -3   2  13 160.271 11.0590   1
   2   2  12 86.0271 16.2874  -2
  -2   2  13 86.0271 16.2874   1
   1   2  13 58.5506 14.0827  -2
  -1   2  13 58.5506 14.0827   1
   0   2  13 25.7627 6.94503  -2
   0   2  13 25.7627 6.94503   1
  -1   2  13 59.3867 16.2164  -2
   1   2  13 59.3867 16.2164   1
  -2   2  14 38.8104 17.6684  -2
   2   2  13 38.8104 17.6684   1
  -3   2  14 156.268 13.2189  -2
   3   2  13 156.268 13.2189   1
  -4   2  14 73.7709 23.2200  -2
   4   2  13 73.7709 23.2200   1
  -5   2  15 120.517 23.8354  -2
   5   2  13 120.517 23.8354   1
  -6   2  15 15.8872 12.2713  -2
   6   2  13 15.8872 12.2713   1
   9   3  10 126.358 25.7375  -2
  -9   3  13 126.358 25.7375   1
   8   3  10 65.0114 31.7247  -2
  -8   3  13 65.0114 31.7247   1
   7   3  11 121.722 50.7854  -2
  -7   3  13 121.722 50.7854   1
   6   3  11 88.5207 14.6472  -2
  -6   3  13 88.5207 14.6472   1
   5   3  11 67.3596 29.9715  -2
  -5   3  13 67.3596 29.9715   1
   4   3  12 85.7659 19.1700  -2
  -4   3  13 85.7659 19.1700   1
   3   3  12 459.431 21.1355  -2
  -3   3  13 459.431 21.1355   1
   2   3  12 72.0279 21.3076  -2
  -2   3  13 72.0279 21.3076   1
   1   3  13 770.025 47.8101  -2
  -1   3  13 770.025 47.8101   1
   0   3  13 2.67104 8.64431  -2
   0   3  13 2.67104 8.64431   1
  -1   3  13 748.889 67.1270  -2
   1   3  13 748.889 67.1270   1
  -2   3  14 122.568 24.6428  -2
   2   3  13 122.568 24.6428   1
  -3   3  14 268.325 22.4730  -2
   3   3  13 268.325 22.4730   1
  -4   3  14 75.5269 22.7085  -2
   4   3  13 75.5269 22.7085   1
  -5   3  15 74.6823 59.2520  -2
   5   3  13 74.6823 59.2520   1
  -6   3  15 37.8931 18.5289  -2
   6   3  13 37.8931 18.5289   1
   9   4  10 169.754 38.5662  -2
  -9   4  13 169.754 38.5662   1
   7   4  11 95.8018 50.0240  -2
  -7   4  13 95.8018 50.0240   1
   6   4  11 80.9556 19.6579  -2
  -6   4  13 80.9556 19.6579   1
   5   4  11 142.729 29.4135  -2
  -5   4  13 142.729 29.4135   1
   4   4  12 27.8277 27.7777  -2
  -4   4  13 27.8277 27.7777   1
   3   4  12 64.1277 18.0461  -2
  -3   4  13 64.1277 18.0461   1
   2   4  12 118.992 22.4537  -2
  -2   4  13 118.992 22.4537   1
   1   4  13 113.717 22.7623  -2
  -1   4  13 113.717 22.7623   1
   0   4  13 60.6059 25.1504  -2
   0   4  13 60.6059 25.1504   1
  -1   4  13 -26.794 56.8398  -2
   1   4  13 -26.794 56.8398   1
  -2   4  14 121.924 24.0697  -2
   2   4  13 121.924 24.0697   1
  -3   4  14 18.4771 12.4405  -2
   3   4  13 18.4771 12.4405   1
   5   4  13 11.7668 33.2986   1
   6   5  11 95.1030 19.9703  -2
  -6   5  13 95.1030 19.9703   1
   5   5  11 77.4573 55.6058  -2
  -5   5  13 77.4573 55.6058   1
   4   5  12 77.7546 61.4261  -2
  -4   5  13 77.7546 61.4261   1
   3   5  12 126.889 15.6088  -2
  -3   5  13 126.889 15.6088   1
   2   5  12 383.531 36.3754  -2
  -2   5  13 383.531 36.3754   1
   0   5  13 255.147 23.9474  -2
   0   5  13 255.147 23.9474   1
  -1   5  13 195.939 65.8050  -2
   1   5  13 195.939 65.8050   1
  -3   5  14 159.213 32.9843  -2
   3   5  13 159.213 32.9843   1
   3   6  12 68.7137 16.9791  -2
  -3   6  13 68.7137 16.9791   1
  -1   6  13 94.9509 17.3058   1
 -10   0  14 210.029 36.9652   1
   9   0  11 65.4692 24.6303  -2
  -9   0  14 65.4692 24.6303   1
   8   0  11 230.861 47.4086  -2
  -8   0  14 230.861 47.4086   1
   7   0  12 49.7152 42.4126  -2
  -7   0  14 49.7152 42.4126   1
   6   0  12 221.143 20.2274  -2
  -6   0  14 221.143 20.2274   1
   5   0  12 10.6099 22.5790  -2
  -5   0  14 10.6099 22.5790   1
   4   0  13 368.432 60.5463  -2
  -4   0  14 368.432 60.5463   1
   3   0  13 3.21529 16.3993  -2
  -3   0  14 3.21529 16.3993   1
   2   0  13 337.129 30.1116  -2
  -2   0  14 337.129 30.1116   1
   1   0  14 -2.1401 22.7607  -2
  -1   0  14 -2.1401 22.7607   1
   0   0  14 284.148 24.9196  -2
   0   0  14 284.148 24.9196   1
  -1   0  14 113.123 29.4756  -2
   1   0  14 113.123 29.4756   1
  -2   0  15 179.855 37.4534  -2
   2   0  14 179.855 37.4534   1
  -3   0  15 7.08720 12.2976  -2
   3   0  14 7.08720 12.2976   1
  -4   0  15 259.722 46.7733  -2
   4   0  14 259.722 46.7733   1
 -10   1  14 73.8240 21.3314   1
   9   1  11 84.3229 20.1754  -2
  -9   1  14 84.3229 20.1754   1
   8   1  11 154.988 25.6255  -2
  -8   1  14 154.988 25.6255   1
   7   1  12 64.9640 23.9619  -2
  -7   1  14 64.9640 23.9619   1
   6   1  12 237.010 14.7144  -2
  -6   1  14 237.010 14.7144   1
   5   1  12 93.2243 18.2573  -2
  -5   1  14 93.2243 18.2573   1
   4   1  13 342.987 25.9780  -2
  -4   1  14 342.987 25.9780   1
   3   1  13 45.0807 9.72724  -2
  -3   1  14 45.0807 9.72724   1
   2   1  13 267.598 25.7316  -2
  -2   1  14 267.598 25.7316   1
   1   1  14 42.9505 27.0153  -2
  -1   1  14 42.9505 27.0153   1
   0   1  14 92.6700 10.2004  -2
   0   1  14 92.6700 10.2004   1
  -1   1  14 -14.293 21.8444  -2
   1   1  14 -14.293 21.8444   1
  -2   1  15 67.2357 21.6416  -2
   2   1  14 67.2357 21.6416   1
  -3   1  15 52.3191 11.3499  -2
   3   1  14 52.3191 11.3499   1
  -4   1  15 104.581 25.2624  -2
   4   1  14 104.581 25.2624   1
  -5   1  16 -13.423 60.2837  -2
   5   1  14 -13.423 60.2837   1
  -6   1  16 71.6098 18.4969  -2
   6   1  14 71.6098 18.4969   1
   9   2  11 191.412 40.7713  -2
  -9   2  14 191.412 40.7713   1
   8   2  11 1.37389 46.6984  -2
  -8   2  14 1.37389 46.6984   1
   7   2  12 79.8449 53.1038  -2
  -7   2  14 79.8449 53.1038   1
   6   2  12 26.8388 11.6303  -2
  -6   2  14 26.8388 11.6303   1
   5   2  12 114.828 20.8844  -2
  -5   2  14 114.828 20.8844   1
   4   2  13 23.3407 29.2045  -2
  -4   2  14 23.3407 29.2045   1
   3   2  13 206.700 13.6006  -2
  -3   2  14 206.700 13.6006   1
   2   2  13 47.0431 21.9863  -2
  -2   2  14 47.0431 21.9863   1
   1   2  14 319.316 31.1955  -2
  -1   2  14 319.316 31.1955   1
   0   2  14 70.1641 10.4100  -2
   0   2  14 70.1641 10.4100   1
  -1   2  14 159.781 25.7678  -2
   1   2  14 159.781 25.7678   1
  -2   2  15 48.6897 22.7104  -2
   2   2  14 48.6897 22.7104   1
  -3   2  15 121.115 13.7406  -2
   3   2  14 121.115 13.7406   1
  -4   2  15 160.786 28.7654  -2
   4   2  14 160.786 28.7654   1
  -5   2  16 107.561 42.4620  -2
   5   2  14 107.561 42.4620   1
   8   3  11 90.1853 45.9468  -2
  -8   3  14 90.1853 45.9468   1
   7   3  12 182.382 58.7137  -2
  -7   3  14 182.382 58.7137   1
   6   3  12 57.1765 16.4982  -2
  -6   3  14 57.1765 16.4982   1
   5   3  12 185.424 28.8943  -2
  -5   3  14 185.424 28.8943   1
   4   3  13 63.4605 27.1012  -2
  -4   3  14 63.4605 27.1012   1
   3   3  13 217.821 17.5516  -2
  -3   3  14 217.821 17.5516   1
   2   3  13 102.488 29.4623  -2
  -2   3  14 102.488 29.4623   1
   1   3  14 144.251 31.4940  -2
  -1   3  14 144.251 31.4940   1
   0   3  14 152.564 17.4586  -2
   0   3  14 152.564 17.4586   1
  -1   3  14 119.406 30.1510  -2
   1   3  14 119.406 30.1510   1
  -3   3  15 56.8509 13.7249  -2
   3   3  14 56.8509 13.7249   1
  -4   3  15 -21.754 61.5794  -2
   4   3  14 -21.754 61.5794   1
  -7   4  14 11.3558 28.3815   1
   6   4  12 280.722 30.9533  -2
  -6   4  14 280.722 30.9533   1
   5   4  12 44.8412 59.7617  -2
  -5   4  14 44.8412 59.7617   1
   4   4  13 -71.502 61.6986  -2
  -4   4  14 -71.502 61.6986   1
   3   4  13 57.8246 13.8358  -2
  -3   4  14 57.8246 13.8358   1
   2   4  13 131.214 33.3029  -2
  -2   4  14 131.214 33.3029   1
   0   4  14 20.7238 14.3614  -2
   0   4  14 20.7238 14.3614   1
  -3   4  15 121.300 23.9278  -2
   3   4  14 121.300 23.9278   1
  -4   5  14 58.2083 19.3574   1
   3   5  13 290.959 21.4239  -2
  -3   5  14 290.959 21.4239   1
  -1   5  14 435.258 60.9722   1
   0   5  14 19.5664 14.6653  -2
   0   5  14 19.5664 14.6653   1
   8   0  12 195.686 52.8918  -2
  -8   0  15 195.686 52.8918   1
   7   0  13 65.9910 50.2978  -2
  -7   0  15 65.9910 50.2978   1
   6   0  13 187.088 21.6556  -2
  -6   0  15 187.088 21.6556   1
   5   0  13 32.0156 39.8155  -2
  -5   0  15 32.0156 39.8155   1
   3   0  14 11.8805 27.8512  -2
  -3   0  15 11.8805 27.8512   1
   2   0  14 101.639 36.3829  -2
  -2   0  15 101.639 36.3829   1
   1   0  15 22.5885 26.6853  -2
  -1   0  15 22.5885 26.6853   1
   0   0  15 65.1744 13.9122  -2
   0   0  15 65.1744 13.9122   1
  -3   0  16 10.3742 17.0439  -2
   3   0  15 10.3742 17.0439   1
   8   1  12 291.795 39.7763  -2
  -8   1  15 291.795 39.7763   1
   7   1  13 284.992 39.3896  -2
  -7   1  15 284.992 39.3896   1
   6   1  13 191.798 19.5461  -2
  -6   1  15 191.798 19.5461   1
   5   1  13 141.282 51.7361  -2
  -5   1  15 141.282 51.7361   1
   3   1  14 22.5702 12.8383  -2
  -3   1  15 22.5702 12.8383   1
   2   1  14 44.0476 30.5220  -2
  -2   1  15 44.0476 30.5220   1
   1   1  15 14.3992 25.2428  -2
  -1   1  15 14.3992 25.2428   1
   0   1  15 34.0168 9.22861  -2
   0   1  15 34.0168 9.22861   1
  -1   1  15 44.2051 22.8851  -2
   1   1  15 44.2051 22.8851   1
  -2   1  16 14.0950 57.7185  -2
   2   1  15 14.0950 57.7185   1
  -3   1  16 65.7717 14.7583  -2
   3   1  15 65.7717 14.7583   1
  -4   1  16 -66.118 64.8425  -2
   4   1  15 -66.118 64.8425   1
   8   2  12 111.633 49.6548  -2
  -8   2  15 111.633 49.6548   1
   7   2  13 59.7015 56.9970  -2
  -7   2  15 59.7015 56.9970   1
   6   2  13 78.6547 30.0293  -2
  -6   2  15 78.6547 30.0293   1
   5   2  13 92.1908 33.1276  -2
  -5   2  15 92.1908 33.1276   1
   3   2  14 72.8138 14.9468  -2
  -3   2  15 72.8138 14.9468   1
   2   2  14 175.984 34.4468  -2
  -2   2  15 175.984 34.4468   1
   1   2  15 202.271 40.8936  -2
  -1   2  15 202.271 40.8936   1
   0   2  15 94.7431 12.3630  -2
   0   2  15 94.7431 12.3630   1
  -1   2  15 183.601 56.2995  -2
   1   2  15 183.601 56.2995   1
  -2   2  16 176.865 60.6757  -2
   2   2  15 176.865 60.6757   1
  -3   2  16 130.833 17.7125  -2
   3   2  15 130.833 17.7125   1
   6   3  13 85.2137 31.3043  -2
  -6   3  15 85.2137 31.3043   1
   5   3  13 206.371 40.2558  -2
  -5   3  15 206.371 40.2558   1
   4   3  14 -16.071 60.1943  -2
  -4   3  15 -16.071 60.1943   1
   3   3  14 41.5267 16.3051  -2
  -3   3  15 41.5267 16.3051   1
   0   3  15 22.6775 17.1605  -2
   0   3  15 22.6775 17.1605   1
   2   3  15 4.34228 16.4516   1
  -4   4  15 -0.9174 17.9301   1
   3   4  14 141.299 27.6768  -2
  -3   4  15 141.299 27.6768   1
  -1   4  15 104.213 17.7304   1
   0   4  15 96.8002 17.6488  -2
   0   4  15 96.8002 17.6488   1
   6   0  14 332.373 49.3392  -2
  -6   0  16 332.373 49.3392   1
   3   0  15 42.8227 18.8338  -2
  -3   0  16 42.8227 18.8338   1
   2   0  15 220.781 44.3725  -2
  -2   0  16 220.781 44.3725   1
   1   0  16 17.9820 48.2150  -2
  -1   0  16 17.9820 48.2150   1
   0   0  16 300.233 35.7592  -2
   0   0  16 300.233 35.7592   1
   6   1  14 82.1852 25.6503  -2
  -6   1  16 82.1852 25.6503   1
   5   1  14 134.515 57.0196  -2
  -5   1  16 134.515 57.0196   1
   3   1  15 31.5798 18.2648  -2
  -3   1  16 31.5798 18.2648   1
   2   1  15 -2.5178 44.7696  -2
  -2   1  16 -2.5178 44.7696   1
   0   1  16 -15.271 20.2068  -2
   0   1  16 -15.271 20.2068   1
   2   1  16 29.4907 15.6048   1
   5   2  14 228.602 61.2541  -2
  -5   2  16 228.602 61.2541   1
   3   2  15 109.100 35.5502  -2
  -3   2  16 109.100 35.5502   1
   2   2  15 368.725 67.2290  -2
  -2   2  16 368.725 67.2290   1
   1   2  16 260.617 65.5383  -2
  -1   2  16 260.617 65.5383   1
   0   2  16 54.1312 12.7080  -2
   0   2  16 54.1312 12.7080   1
   0   0   0    0.00    0.00   0
;
_shelx_hkl_checksum   64115
