# Supplementary material for: Mono-, Di- and Tetra-iron Complexes with Selenium or Sulphur Functionalized Vinyliminium Ligands: Synthesis, Structural Characterization and Antiproliferative Activity
Source: Molecules. 2020 Apr 3;25(7):1656. doi: 10.3390/molecules25071656 (PMC7180837; doi:10.3390/molecules25071656)
Supplement: Supplementary file 1 [file molecules-25-01656-s001.zip › Supporting Material/DFT coordinates.xyz]

63
2b-is1-edf2
Fe      -2.152000000     -0.142000000     -0.099000000
Fe       0.229000000     -0.861000000      0.442000000
C       -4.180000000      0.016000000     -0.607000000
H       -4.589000000      0.798000000     -1.230000000
C       -3.717000000     -1.243000000     -1.058000000
H       -3.672000000     -1.570000000     -2.084000000
C       -3.259000000     -1.964000000      0.066000000
H       -2.841000000     -2.958000000      0.054000000
C       -3.464000000     -1.156000000      1.220000000
H       -3.202000000     -1.419000000      2.235000000
C       -4.038000000      0.067000000      0.815000000
H       -4.294000000      0.897000000      1.456000000
C        0.379000000     -2.097000000      2.146000000
H       -0.261000000     -2.012000000      3.012000000
C        0.142000000     -2.924000000      1.014000000
H       -0.694000000     -3.595000000      0.886000000
C        1.192000000     -2.701000000      0.093000000
H        1.282000000     -3.123000000     -0.897000000
C        2.079000000     -1.747000000      0.659000000
H        2.956000000     -1.357000000      0.168000000
C        1.581000000     -1.375000000      1.940000000
H        2.016000000     -0.655000000      2.616000000
C       -1.940000000      1.515000000     -0.568000000
O       -1.899000000      2.620000000     -0.910000000
C       -1.017000000      0.116000000      1.421000000
O       -1.156000000      0.583000000      2.499000000
C       -0.692000000     -0.616000000     -1.346000000
C        0.491000000      0.192000000     -1.472000000
C        0.834000000      0.784000000     -0.207000000
N        1.413000000      1.921000000      0.066000000
C        1.566000000      2.991000000     -0.928000000
H        1.085000000      2.698000000     -1.856000000
H        2.626000000      3.166000000     -1.120000000
H        1.117000000      3.903000000     -0.530000000
S        1.736000000      0.092000000     -2.650000000
C       -1.024000000     -1.499000000     -2.491000000
C       -1.788000000     -3.068000000     -4.706000000
C       -1.248000000     -0.919000000     -3.749000000
C       -1.182000000     -2.885000000     -2.378000000
C       -1.554000000     -3.662000000     -3.471000000
C       -1.635000000     -1.690000000     -4.837000000
H       -1.113000000      0.150000000     -3.865000000
H       -1.019000000     -3.360000000     -1.419000000
H       -1.663000000     -4.735000000     -3.353000000
H       -1.806000000     -1.213000000     -5.796000000
H       -2.083000000     -3.671000000     -5.558000000
C        2.058000000      2.161000000      1.339000000
C        3.324000000      2.585000000      3.762000000
C        3.389000000      1.740000000      1.492000000
C        1.374000000      2.854000000      2.346000000
C        2.030000000      3.043000000      3.564000000
C        4.000000000      1.950000000      2.728000000
H        1.508000000      3.559000000      4.364000000
H        5.023000000      1.617000000      2.870000000
H        3.813000000      2.735000000      4.719000000
C       -0.004000000      3.421000000      2.159000000
H        0.024000000      4.514000000      2.225000000
H       -0.679000000      3.057000000      2.936000000
H       -0.442000000      3.154000000      1.200000000
C        4.185000000      1.132000000      0.368000000
H        4.908000000      1.861000000     -0.016000000
H        3.576000000      0.808000000     -0.478000000
H        4.766000000      0.277000000      0.724000000
63
2b-is2-edf2
Fe      -2.249000000     -0.338000000      0.561000000
Fe       0.112000000     -0.962000000      1.182000000
C       -4.298000000     -0.326000000      0.095000000
H       -4.769000000      0.403000000     -0.549000000
C       -3.776000000     -1.576000000     -0.317000000
H       -3.742000000     -1.945000000     -1.330000000
C       -3.251000000     -2.220000000      0.822000000
H       -2.781000000     -3.190000000      0.837000000
C       -3.473000000     -1.375000000      1.948000000
H       -3.178000000     -1.581000000      2.966000000
C       -4.127000000     -0.205000000      1.507000000
H       -4.416000000      0.636000000      2.120000000
C        0.124000000     -2.184000000      2.917000000
H       -0.600000000     -2.117000000      3.716000000
C        0.040000000     -3.029000000      1.780000000
H       -0.752000000     -3.730000000      1.569000000
C        1.171000000     -2.775000000      0.970000000
H        1.380000000     -3.200000000      0.000000000
C        1.964000000     -1.788000000      1.616000000
H        2.886000000     -1.383000000      1.229000000
C        1.320000000     -1.427000000      2.831000000
H        1.669000000     -0.711000000      3.559000000
C       -2.192000000      1.259000000     -0.111000000
O       -2.320000000      2.296000000     -0.606000000
C       -1.144000000      0.145000000      2.016000000
O       -1.246000000      0.770000000      3.017000000
C       -0.727000000     -0.791000000     -0.640000000
C        0.483000000     -0.012000000     -0.810000000
C        0.826000000      0.592000000      0.453000000
N        1.545000000      1.638000000      0.779000000
C        1.778000000      1.972000000      2.188000000
H        1.099000000      1.406000000      2.817000000
H        1.593000000      3.038000000      2.327000000
H        2.816000000      1.769000000      2.466000000
S        1.641000000     -0.230000000     -2.041000000
C       -1.087000000     -1.687000000     -1.767000000
C       -1.937000000     -3.276000000     -3.934000000
C       -1.467000000     -1.107000000     -2.987000000
C       -1.125000000     -3.081000000     -1.670000000
C       -1.543000000     -3.867000000     -2.740000000
C       -1.896000000     -1.888000000     -4.051000000
H       -1.424000000     -0.028000000     -3.091000000
H       -0.827000000     -3.558000000     -0.746000000
H       -1.560000000     -4.947000000     -2.635000000
H       -2.189000000     -1.411000000     -4.980000000
H       -2.269000000     -3.887000000     -4.767000000
C        2.245000000      2.529000000     -0.137000000
C        3.690000000      4.314000000     -1.681000000
C        1.628000000      3.710000000     -0.561000000
C        3.587000000      2.240000000     -0.433000000
C        4.290000000      3.150000000     -1.219000000
C        2.375000000      4.591000000     -1.347000000
H        5.323000000      2.934000000     -1.469000000
H        1.907000000      5.509000000     -1.689000000
H        4.256000000      5.012000000     -2.290000000
C        4.257000000      0.983000000      0.034000000
H        5.319000000      0.998000000     -0.217000000
H        3.793000000      0.127000000     -0.467000000
H        4.176000000      0.836000000      1.116000000
C        0.210000000      4.054000000     -0.216000000
H        0.086000000      5.136000000     -0.144000000
H       -0.116000000      3.611000000      0.727000000
H       -0.477000000      3.695000000     -0.984000000
63
2b-is1-wB97X
Fe      -1.238792000      1.525539000     -0.172430000
Fe       0.108620000     -0.251860000      1.030431000
C       -2.564035000      2.996011000     -0.829131000
H       -2.693173000      3.285265000     -1.872522000
C       -3.300509000      1.986347000     -0.153259000
H       -4.068784000      1.351993000     -0.593639000
C       -2.824015000      1.921554000      1.179911000
H       -3.182535000      1.244682000      1.952829000
C       -1.797544000      2.896280000      1.326089000
H       -1.221466000      3.084085000      2.232539000
C       -1.633967000      3.569949000      0.087819000
H       -0.916522000      4.360647000     -0.128137000
C        0.565223000      0.329887000      2.983146000
H        0.737285000      1.357825000      3.301916000
C       -0.690501000     -0.345480000      2.986930000
H       -1.637737000      0.072164000      3.325524000
C       -0.474976000     -1.644497000      2.465460000
H       -1.232410000     -2.404966000      2.274927000
C        0.906323000     -1.776025000      2.148842000
H        1.361525000     -2.656041000      1.697371000
C        1.557907000     -0.553334000      2.479804000
H        2.613552000     -0.321283000      2.337111000
C       -0.611452000      1.459492000     -1.825324000
O       -0.280589000      1.430162000     -2.920670000
C        0.516445000      1.553015000      0.559993000
O        1.375752000      2.322386000      0.755577000
C       -1.391910000     -0.439217000     -0.328445000
C       -0.336411000     -1.269402000     -0.802560000
C        0.952944000     -0.670048000     -0.593539000
N        2.038866000     -0.674945000     -1.305474000
C        2.075136000     -1.128762000     -2.699448000
H        1.100088000     -1.550910000     -2.968896000
H        2.845354000     -1.906373000     -2.804595000
H        2.331678000     -0.280237000     -3.351043000
S       -0.372569000     -2.965609000     -1.153157000
C       -2.763778000     -1.028479000     -0.337765000
C       -5.395488000     -2.036434000     -0.501917000
C       -3.366735000     -1.283376000     -1.580447000
C       -3.505020000     -1.299518000      0.817580000
C       -4.806042000     -1.801485000      0.737763000
C       -4.666487000     -1.773141000     -1.664275000
H       -2.798092000     -1.088903000     -2.494986000
H       -3.064547000     -1.114018000      1.799333000
H       -5.361076000     -2.007182000      1.657708000
H       -5.114361000     -1.956868000     -2.645263000
H       -6.415513000     -2.425499000     -0.565276000
C        3.314845000     -0.321943000     -0.717222000
C        5.732796000      0.326371000      0.467885000
C        4.020582000     -1.322474000     -0.026957000
C        3.823152000      0.975393000     -0.885182000
C        5.039730000      1.282722000     -0.267080000
C        5.231752000     -0.967663000      0.575109000
H        5.445785000      2.293409000     -0.371310000
H        5.790627000     -1.727684000      1.129618000
H        6.679222000      0.587317000      0.949333000
C        3.141425000      2.017891000     -1.732589000
H        3.669804000      2.129918000     -2.693186000
H        3.152911000      2.994089000     -1.228393000
H        2.097632000      1.767691000     -1.953953000
C        3.555159000     -2.756797000      0.037573000
H        4.202579000     -3.383535000     -0.597057000
H        2.519843000     -2.900968000     -0.303858000
H        3.643234000     -3.147319000      1.062862000
63
2d-is1-edf2
Fe      -2.134000000     -0.149000000     -0.091000000
Fe       0.253000000     -0.873000000      0.427000000
C       -4.169000000      0.014000000     -0.567000000
H       -4.587000000      0.801000000     -1.178000000
C       -3.715000000     -1.242000000     -1.034000000
H       -3.684000000     -1.561000000     -2.064000000
C       -3.240000000     -1.972000000      0.078000000
H       -2.825000000     -2.966000000      0.052000000
C       -3.428000000     -1.172000000      1.241000000
H       -3.152000000     -1.443000000      2.249000000
C       -4.007000000      0.055000000      0.853000000
H       -4.253000000      0.880000000      1.504000000
C        0.396000000     -2.109000000      2.129000000
H       -0.244000000     -2.019000000      2.994000000
C        0.157000000     -2.936000000      0.998000000
H       -0.684000000     -3.601000000      0.868000000
C        1.208000000     -2.718000000      0.077000000
H        1.296000000     -3.136000000     -0.915000000
C        2.098000000     -1.768000000      0.643000000
H        2.973000000     -1.378000000      0.145000000
C        1.602000000     -1.392000000      1.922000000
H        2.038000000     -0.671000000      2.597000000
C       -1.928000000      1.505000000     -0.577000000
O       -1.891000000      2.605000000     -0.934000000
C       -0.984000000      0.116000000      1.414000000
O       -1.106000000      0.586000000      2.492000000
C       -0.688000000     -0.620000000     -1.352000000
C        0.506000000      0.160000000     -1.460000000
C        0.864000000      0.773000000     -0.222000000
N        1.433000000      1.915000000      0.055000000
C        1.597000000      2.978000000     -0.944000000
H        1.144000000      2.668000000     -1.882000000
H        2.660000000      3.162000000     -1.111000000
H        1.127000000      3.888000000     -0.567000000
Se       1.894000000     -0.003000000     -2.726000000
C       -1.040000000     -1.493000000     -2.498000000
C       -1.852000000     -3.037000000     -4.711000000
C       -1.297000000     -0.898000000     -3.742000000
C       -1.191000000     -2.879000000     -2.396000000
C       -1.586000000     -3.645000000     -3.489000000
C       -1.707000000     -1.657000000     -4.829000000
H       -1.169000000      0.174000000     -3.849000000
H       -1.001000000     -3.365000000     -1.448000000
H       -1.688000000     -4.720000000     -3.381000000
H       -1.903000000     -1.169000000     -5.779000000
H       -2.166000000     -3.631000000     -5.562000000
C        2.053000000      2.165000000      1.339000000
C        3.261000000      2.613000000      3.789000000
C        3.378000000      1.743000000      1.530000000
C        1.347000000      2.871000000      2.323000000
C        1.974000000      3.072000000      3.554000000
C        3.959000000      1.965000000      2.779000000
H        1.434000000      3.599000000      4.335000000
H        4.978000000      1.630000000      2.948000000
H        3.727000000      2.773000000      4.756000000
C       -0.025000000      3.442000000      2.100000000
H        0.011000000      4.535000000      2.138000000
H       -0.712000000      3.104000000      2.878000000
H       -0.451000000      3.153000000      1.143000000
C        4.203000000      1.123000000      0.434000000
H        4.926000000      1.853000000      0.051000000
H        3.615000000      0.779000000     -0.419000000
H        4.785000000      0.281000000      0.817000000
63
2d-is2-edf2
Fe       2.233000000     -0.666000000      0.354000000
Fe      -0.165000000     -1.165000000      0.968000000
C        4.302000000     -0.295000000      0.348000000
H        4.807000000      0.310000000     -0.392000000
C        3.794000000      0.168000000      1.585000000
H        3.804000000      1.190000000      1.930000000
C        3.210000000     -0.930000000      2.249000000
H        2.731000000     -0.901000000      3.214000000
C        3.386000000     -2.084000000      1.432000000
H        3.043000000     -3.083000000      1.658000000
C        4.066000000     -1.700000000      0.256000000
H        4.330000000     -2.344000000     -0.569000000
C       -0.275000000     -2.888000000      2.194000000
H        0.405000000     -3.725000000      2.131000000
C       -0.130000000     -1.753000000      3.035000000
H        0.670000000     -1.586000000      3.739000000
C       -1.213000000     -0.882000000      2.774000000
H       -1.362000000      0.107000000      3.183000000
C       -2.038000000     -1.487000000      1.789000000
H       -2.933000000     -1.045000000      1.376000000
C       -1.463000000     -2.736000000      1.433000000
H       -1.848000000     -3.444000000      0.715000000
C        2.227000000     -0.060000000     -1.271000000
O        2.395000000      0.363000000     -2.333000000
C        1.067000000     -2.080000000     -0.107000000
O        1.128000000     -3.099000000     -0.708000000
C        0.771000000      0.616000000      0.778000000
C       -0.444000000      0.804000000      0.027000000
C       -0.837000000     -0.420000000     -0.603000000
N       -1.557000000     -0.720000000     -1.656000000
C       -1.793000000     -2.122000000     -2.018000000
H       -1.136000000     -2.767000000     -1.443000000
H       -1.576000000     -2.244000000     -3.081000000
H       -2.838000000     -2.394000000     -1.851000000
Se      -1.686000000      2.170000000      0.319000000
C        1.185000000      1.735000000      1.661000000
C        2.155000000      3.873000000      3.216000000
C        1.625000000      2.924000000      1.062000000
C        1.226000000      1.652000000      3.055000000
C        1.702000000      2.709000000      3.825000000
C        2.112000000      3.975000000      1.827000000
H        1.578000000      3.016000000     -0.018000000
H        0.881000000      0.750000000      3.545000000
H        1.719000000      2.618000000      4.906000000
H        2.450000000      4.882000000      1.337000000
H        2.532000000      4.695000000      3.815000000
C       -2.257000000      0.215000000     -2.528000000
C       -3.703000000      1.792000000     -4.285000000
C       -1.625000000      0.705000000     -3.675000000
C       -3.612000000      0.466000000     -2.258000000
C       -4.315000000      1.268000000     -3.154000000
C       -2.372000000      1.507000000     -4.541000000
H       -5.359000000      1.484000000     -2.951000000
H       -1.891000000      1.899000000     -5.431000000
H       -4.269000000      2.414000000     -4.970000000
C       -4.298000000     -0.047000000     -1.028000000
H       -5.370000000      0.153000000     -1.074000000
H       -3.886000000      0.470000000     -0.153000000
H       -4.169000000     -1.123000000     -0.881000000
C       -0.190000000      0.417000000     -3.994000000
H       -0.025000000      0.449000000     -5.073000000
H        0.140000000     -0.557000000     -3.630000000
H        0.470000000      1.161000000     -3.541000000
63
2d-is1-wB97X
Fe      -1.165264000      1.700761000     -0.321023000
Fe       0.136477000      0.054321000      1.101900000
C       -2.418168000      3.158802000     -1.131888000
H       -2.525460000      3.352446000     -2.199601000
C       -3.202758000      2.247449000     -0.372591000
H       -3.994193000      1.607715000     -0.761135000
C       -2.740632000      2.290693000      0.966344000
H       -3.129639000      1.700808000      1.793648000
C       -1.674138000      3.229305000      1.031455000
H       -1.097267000      3.477654000      1.922757000
C       -1.473151000      3.777303000     -0.263368000
H       -0.720113000      4.512231000     -0.544772000
C        0.616402000      0.906433000      2.944038000
H        0.818483000      1.965211000      3.105986000
C       -0.657791000      0.274221000      3.049042000
H       -1.593295000      0.765076000      3.314680000
C       -0.479712000     -1.093457000      2.730532000
H       -1.257471000     -1.853498000      2.654316000
C        0.895889000     -1.309934000      2.436876000
H        1.322062000     -2.260120000      2.118788000
C        1.582177000     -0.070604000      2.580113000
H        2.643217000      0.108837000      2.405242000
C       -0.586235000      1.391713000     -1.964618000
O       -0.287532000      1.200408000     -3.052415000
C        0.600756000      1.765326000      0.364263000
O        1.495902000      2.513051000      0.444830000
C       -1.378079000     -0.261624000     -0.224569000
C       -0.344394000     -1.176536000     -0.554508000
C        0.961836000     -0.604824000     -0.448884000
N        2.040222000     -0.722784000     -1.162764000
C        2.060878000     -1.378355000     -2.473644000
H        1.035791000     -1.599321000     -2.791034000
H        2.624850000     -2.320347000     -2.403985000
H        2.555001000     -0.712878000     -3.195722000
Se      -0.441050000     -3.067751000     -0.654434000
C       -2.772604000     -0.792659000     -0.169277000
C       -5.441257000     -1.705511000     -0.228270000
C       -3.391771000     -1.142408000     -1.380143000
C       -3.515536000     -0.919012000      1.009117000
C       -4.835715000     -1.374113000      0.981267000
C       -4.709966000     -1.586698000     -1.412525000
H       -2.822435000     -1.059353000     -2.311257000
H       -3.061904000     -0.657226000      1.967336000
H       -5.392708000     -1.467150000      1.918051000
H       -5.170419000     -1.847551000     -2.369842000
H       -6.476393000     -2.057305000     -0.250810000
C        3.326666000     -0.295831000     -0.648426000
C        5.766276000      0.521279000      0.380907000
C        4.033240000     -1.170151000      0.194748000
C        3.843696000      0.950089000     -1.039118000
C        5.070460000      1.345724000     -0.497318000
C        5.255781000     -0.729652000      0.712776000
H        5.482097000      2.320595000     -0.775210000
H        5.815973000     -1.390099000      1.381665000
H        6.720922000      0.850972000      0.799943000
C        3.160846000      1.845133000     -2.040374000
H        3.677045000      1.788659000     -3.012493000
H        3.192639000      2.891551000     -1.706282000
H        2.111181000      1.577703000     -2.205820000
C        3.558673000     -2.566045000      0.515701000
H        4.209700000     -3.301340000      0.016164000
H        2.526367000     -2.766264000      0.194692000
H        3.631623000     -2.760172000      1.596724000
31
3-edf2
Fe      -1.117000000     -0.300000000     -0.468000000
H        0.504000000     -0.741000000     -2.782000000
C       -0.395000000     -0.249000000     -2.445000000
C       -0.494000000      1.071000000     -1.936000000
H       -1.968000000     -1.805000000     -2.754000000
H        0.330000000      1.758000000     -1.813000000
C       -1.845000000      1.326000000     -1.600000000
H       -2.249000000      2.251000000     -1.216000000
C       -2.597000000      0.154000000     -1.923000000
H       -3.661000000      0.025000000     -1.787000000
C       -1.708000000     -0.804000000     -2.442000000
C       -2.191000000     -0.260000000      0.884000000
O       -2.936000000     -0.201000000      1.770000000
C        0.436000000      0.085000000      0.645000000
C        1.343000000     -0.978000000      0.946000000
H        2.286000000     -0.801000000      1.456000000
C        1.010000000     -2.280000000      0.686000000
Se      -0.637000000     -2.630000000     -0.108000000
C        1.900000000     -3.422000000      1.061000000
H        2.136000000     -4.033000000      0.185000000
H        1.401000000     -4.081000000      1.778000000
H        2.836000000     -3.074000000      1.505000000
N        0.775000000      1.297000000      1.122000000
C        2.020000000      1.550000000      1.846000000
H        2.041000000      1.021000000      2.804000000
H        2.106000000      2.618000000      2.039000000
H        2.887000000      1.240000000      1.258000000
C       -0.106000000      2.449000000      1.069000000
H        0.323000000      3.248000000      0.452000000
H       -0.260000000      2.846000000      2.078000000
H       -1.063000000      2.151000000      0.658000000
31
3-wB97X
Fe      -0.609758000     -0.554259000      0.073706000
H       -0.256542000     -0.883403000     -2.755367000
C       -0.919092000     -1.128691000     -1.926148000
C       -2.021716000     -0.355462000     -1.467046000
H       -0.098933000     -3.079757000     -1.182303000
H       -2.340146000      0.600430000     -1.883068000
C       -2.613665000     -1.019770000     -0.365763000
H       -3.488140000     -0.689556000      0.195215000
C       -1.880896000     -2.233371000     -0.145057000
H       -2.083539000     -2.974616000      0.627820000
C       -0.850871000     -2.294639000     -1.105851000
C       -0.725420000     -0.440007000      1.824495000
O       -0.810007000     -0.381658000      2.967955000
C       -0.077381000      1.341769000     -0.100461000
C        1.313383000      1.634103000     -0.371091000
H        1.656795000      2.646238000     -0.604963000
C        2.263395000      0.661236000     -0.239427000
Se       1.742141000     -1.062195000      0.213944000
C        3.724960000      0.947146000     -0.426417000
H        4.140464000      0.309777000     -1.222300000
H        4.281575000      0.709793000      0.493573000
H        3.904254000      2.000770000     -0.685544000
N       -0.899515000      2.390048000     -0.049793000
C       -0.469555000      3.756823000     -0.346081000
H        0.232896000      4.129483000      0.415597000
H       -1.348177000      4.413081000     -0.359558000
H        0.014349000      3.814697000     -1.330832000
C       -2.288340000      2.298055000      0.374554000
H       -2.974051000      2.514921000     -0.461370000
H       -2.476760000      3.034830000      1.170764000
H       -2.495283000      1.298461000      0.762530000
126
4b-wB97X
Fe       4.889178000     -1.141176000      0.803339000
Fe       3.851857000      0.281722000     -1.050767000
C        6.127682000     -2.307681000      2.015925000
H        6.029149000     -2.392889000      3.098526000
C        5.479959000     -3.137935000      1.051819000
H        4.799666000     -3.960614000      1.269339000
C        5.881881000     -2.697096000     -0.234311000
H        5.557539000     -3.122356000     -1.182745000
C        6.756556000     -1.594106000     -0.067191000
H        7.231589000     -1.026404000     -0.867195000
C        6.913484000     -1.349423000      1.328531000
H        7.513586000     -0.561865000      1.782631000
C        5.416881000      0.915113000     -2.277621000
H        6.438007000      1.102950000     -1.945763000
C        4.911222000     -0.322273000     -2.776309000
H        5.478236000     -1.243892000     -2.903226000
C        3.542103000     -0.129730000     -3.070721000
H        2.841828000     -0.881142000     -3.436078000
C        3.198443000      1.216184000     -2.756867000
H        2.210448000      1.657920000     -2.878419000
C        4.367905000      1.870106000     -2.273628000
H        4.446425000      2.902362000     -1.931587000
C        3.940874000     -0.824057000      2.275997000
O        3.328244000     -0.709092000      3.230780000
C        5.145164000      0.667208000      0.445784000
O        5.756660000      1.616939000      0.710989000
C        3.142974000     -1.368204000     -0.072096000
C        2.141793000     -0.370397000     -0.109406000
C        2.604375000      0.973041000      0.139396000
N        2.157467000      1.972809000      0.831870000
C        1.017282000      1.886870000      1.750867000
H        0.680279000      0.846401000      1.823620000
H        0.203863000      2.523892000      1.380320000
H        1.332187000      2.242153000      2.741300000
S        0.615055000     -0.823389000     -0.982339000
C        2.729885000     -2.763738000     -0.431482000
C        1.963229000     -5.427314000     -0.935324000
C        2.131934000     -3.546175000      0.570835000
C        2.933731000     -3.341215000     -1.689715000
C        2.551390000     -4.660797000     -1.938778000
C        1.753608000     -4.862969000      0.324349000
H        1.989673000     -3.120005000      1.569504000
H        3.407215000     -2.765638000     -2.487463000
H        2.723879000     -5.091950000     -2.928413000
H        1.298305000     -5.454003000      1.123808000
H        1.674572000     -6.463428000     -1.130468000
C        2.808641000      3.278951000      0.778531000
C        4.040348000      5.762643000      0.703024000
C        2.489353000      4.163041000     -0.265941000
C        3.693239000      3.631409000      1.813153000
C        4.308773000      4.883887000      1.746402000
C        3.132316000      5.405383000     -0.286480000
H        5.012088000      5.167990000      2.534414000
H        2.901002000      6.104086000     -1.095823000
H        4.533951000      6.737206000      0.667090000
C        3.992854000      2.746518000      2.994921000
H        3.546197000      3.167897000      3.909397000
H        5.077965000      2.681779000      3.158061000
H        3.610734000      1.726696000      2.881553000
C        1.479921000      3.865860000     -1.343844000
H        0.689142000      4.631263000     -1.339287000
H        0.988417000      2.894946000     -1.219585000
H        1.950621000      3.896787000     -2.338606000
Fe      -4.891330000      1.140413000      0.802145000
Fe      -3.850071000     -0.282116000     -1.049969000
C       -6.115128000      2.329800000      2.007908000
H       -6.003690000      2.435066000      3.087483000
C       -5.481039000      3.143294000      1.021750000
H       -4.797593000      3.969160000      1.216092000
C       -5.896342000      2.677987000     -0.251220000
H       -5.583945000      3.086867000     -1.210830000
C       -6.768434000      1.577302000     -0.053474000
H       -7.251622000      0.994255000     -0.837461000
C       -6.909035000      1.358097000      1.347598000
H       -7.503117000      0.578741000      1.823243000
C       -5.411892000     -0.920063000     -2.279053000
H       -6.432881000     -1.111694000     -1.949057000
C       -4.909752000      0.319357000     -2.776312000
H       -5.479953000      1.238969000     -2.902785000
C       -3.539661000      0.131885000     -3.069117000
H       -2.841554000      0.886079000     -3.432919000
C       -3.191862000     -1.213141000     -2.755672000
H       -2.202122000     -1.651397000     -2.875879000
C       -4.359730000     -1.871411000     -2.274423000
H       -4.435312000     -2.904172000     -1.933249000
C       -3.946633000      0.823360000      2.277135000
O       -3.336190000      0.708670000      3.233335000
C       -5.145303000     -0.668090000      0.444517000
O       -5.757026000     -1.617713000      0.709649000
C       -3.143922000      1.367816000     -0.070416000
C       -2.141657000      0.371010000     -0.107181000
C       -2.603134000     -0.972825000      0.141063000
N       -2.155208000     -1.972792000      0.832547000
C       -1.014203000     -1.886647000      1.750541000
H       -0.678242000     -0.845861000      1.823892000
H       -0.200472000     -2.522543000      1.378638000
H       -1.327797000     -2.243130000      2.740957000
S       -0.615211000      0.826554000     -0.979273000
C       -2.732246000      2.763748000     -0.429075000
C       -1.969765000      5.428876000     -0.930056000
C       -2.129730000      3.543974000      0.572280000
C       -2.943184000      3.344191000     -1.684662000
C       -2.562729000      4.664608000     -1.932381000
C       -1.753556000      4.861588000      0.327254000
H       -1.983107000      3.115407000      1.569283000
H       -3.420256000      2.770120000     -2.481372000
H       -2.740405000      5.098160000     -2.920042000
H       -1.294740000      5.451000000      1.125912000
H       -1.682630000      6.465613000     -1.124114000
C       -2.805961000     -3.279156000      0.779431000
C       -4.036075000     -5.763687000      0.705290000
C       -2.486513000     -4.163402000     -0.264845000
C       -3.690290000     -3.631645000      1.814270000
C       -4.305004000     -4.884565000      1.748226000
C       -3.128559000     -5.406231000     -0.284620000
H       -5.008019000     -5.168751000      2.536479000
H       -2.897007000     -6.105112000     -1.093740000
H       -4.528946000     -6.738643000      0.669981000
C       -3.990564000     -2.746179000      2.995419000
H       -3.545177000     -3.167494000      3.910531000
H       -5.075823000     -2.680682000      3.157374000
H       -3.607699000     -1.726657000      2.881981000
C       -1.478568000     -3.865320000     -1.343852000
H       -0.690001000     -4.632926000     -1.343817000
H       -0.984174000     -2.896153000     -1.217224000
H       -1.951516000     -3.891262000     -2.337712000
126
4d-wB97X
Fe      -4.923265000      1.090683000      1.062499000
Fe      -4.091425000     -0.272502000     -0.938542000
C       -6.086143000      2.109697000      2.463751000
H       -5.928472000      2.065562000      3.541776000
C       -5.476465000      3.040832000      1.564198000
H       -4.779091000      3.832120000      1.837372000
C       -5.960241000      2.758371000      0.261310000
H       -5.682555000      3.285218000     -0.650306000
C       -6.835017000      1.648764000      0.347625000
H       -7.363041000      1.182718000     -0.483875000
C       -6.918282000      1.245865000      1.714688000
H       -7.502132000      0.414441000      2.107714000
C       -5.800359000     -0.828917000     -1.997356000
H       -6.785646000     -0.980350000     -1.556511000
C       -5.302032000      0.393014000     -2.537085000
H       -5.839115000      1.339399000     -2.594376000
C       -3.981227000      0.148357000     -2.980144000
H       -3.295178000      0.875287000     -3.415731000
C       -3.663219000     -1.214378000     -2.719728000
H       -2.716382000     -1.695872000     -2.957632000
C       -4.796187000     -1.826236000     -2.114400000
H       -4.874619000     -2.859138000     -1.774271000
C       -3.807008000      0.722913000      2.398925000
O       -3.081623000      0.567646000      3.265331000
C       -5.217657000     -0.706181000      0.671793000
O       -5.802687000     -1.664331000      0.966496000
C       -3.290647000      1.358345000      0.004089000
C       -2.293347000      0.370259000     -0.156354000
C       -2.717615000     -0.979443000      0.101258000
N       -2.199995000     -1.988042000      0.730723000
C       -1.006792000     -1.896575000      1.579621000
H       -0.676181000     -0.852784000      1.635593000
H       -0.208614000     -2.524149000      1.162490000
H       -1.260602000     -2.255698000      2.586459000
Se      -0.742585000      0.901110000     -1.236889000
C       -2.916312000      2.760065000     -0.373258000
C       -2.116824000      5.396430000     -0.960822000
C       -2.236088000      3.537694000      0.578569000
C       -3.195438000      3.331699000     -1.620080000
C       -2.796533000      4.637890000     -1.910869000
C       -1.840458000      4.841001000      0.290139000
H       -2.028800000      3.114516000      1.567047000
H       -3.736639000      2.759453000     -2.376058000
H       -3.025125000      5.063574000     -2.891417000
H       -1.315563000      5.428012000      1.048930000
H       -1.810313000      6.420463000     -1.189153000
C       -2.818811000     -3.308264000      0.668946000
C       -4.003748000     -5.811123000      0.540690000
C       -2.531580000     -4.140065000     -0.428477000
C       -3.636698000     -3.726482000      1.731276000
C       -4.230723000     -4.989240000      1.637644000
C       -3.153346000     -5.391001000     -0.477025000
H       -4.885111000     -5.324627000      2.447388000
H       -2.954074000     -6.046813000     -1.329355000
H       -4.483616000     -6.791460000      0.482279000
C       -3.877269000     -2.908728000      2.973353000
H       -3.335858000     -3.346893000      3.826943000
H       -4.946351000     -2.904239000      3.227568000
H       -3.552650000     -1.867373000      2.875644000
C       -1.544193000     -3.779526000     -1.506890000
H       -0.546553000     -4.182492000     -1.262421000
H       -1.428267000     -2.698239000     -1.635934000
H       -1.845938000     -4.213407000     -2.470726000
Fe       4.911031000     -1.103526000      1.065002000
Fe       4.097429000      0.271211000     -0.936416000
C        6.087336000     -2.098535000      2.471936000
H        5.949204000     -2.022433000      3.550819000
C        5.448660000     -3.045252000      1.607907000
H        4.746849000     -3.820463000      1.914038000
C        5.915395000     -2.806462000      0.290145000
H        5.614123000     -3.353282000     -0.601985000
C        6.804753000     -1.706697000      0.330462000
H        7.325638000     -1.271814000     -0.521982000
C        6.916451000     -1.267696000      1.685008000
H        7.518345000     -0.434163000      2.045032000
C        5.819506000      0.804866000     -1.984296000
H        6.805554000      0.934843000     -1.538267000
C        5.301336000     -0.402859000     -2.536329000
H        5.820483000     -1.358844000     -2.599653000
C        3.986766000     -0.129953000     -2.982377000
H        3.289512000     -0.840381000     -3.427324000
C        3.692963000      1.236195000     -2.712048000
H        2.756608000      1.737620000     -2.950098000
C        4.834162000      1.821625000     -2.096739000
H        4.929764000      2.849894000     -1.747166000
C        3.791152000     -0.730653000      2.396842000
O        3.062844000     -0.571533000      3.260096000
C        5.220186000      0.692156000      0.680132000
O        5.809643000      1.645918000      0.980070000
C        3.281341000     -1.357941000     -0.001453000
C        2.291703000     -0.362527000     -0.162390000
C        2.724030000      0.983836000      0.100029000
N        2.211968000      1.993566000      0.732338000
C        1.023081000      1.905925000      1.587687000
H        0.685308000      0.864314000      1.640456000
H        0.226732000      2.541044000      1.178699000
H        1.286035000      2.257823000      2.594760000
Se       0.742104000     -0.872702000     -1.254891000
C        2.899832000     -2.755991000     -0.385525000
C        2.092126000     -5.387078000     -0.985701000
C        2.234552000     -3.542737000      0.569165000
C        3.158887000     -3.315368000     -1.642306000
C        2.756300000     -4.619041000     -1.939171000
C        1.834601000     -4.843373000      0.274320000
H        2.041545000     -3.129183000      1.564576000
H        3.688661000     -2.735714000     -2.400658000
H        2.969890000     -5.035330000     -2.927115000
H        1.321233000     -5.437546000      1.035399000
H        1.782703000     -6.409184000     -1.218722000
C        2.835749000      3.311200000      0.668854000
C        4.032292000      5.807685000      0.534108000
C        2.548108000      4.143318000     -0.428090000
C        3.658380000      3.726551000      1.728587000
C        4.258678000      4.986027000      1.631507000
C        3.175953000      5.391119000     -0.480093000
H        4.917478000      5.319155000      2.438562000
H        2.976759000      6.047355000     -1.332099000
H        4.517111000      6.785407000      0.472848000
C        3.892849000      2.909126000      2.971938000
H        3.313613000      3.321978000      3.813466000
H        4.953998000      2.938728000      3.255395000
H        3.606876000      1.858145000      2.857565000
C        1.552164000      3.786974000     -1.500118000
H        0.553554000      4.177675000     -1.239775000
H        1.444680000      2.706194000     -1.641692000
H        1.839114000      4.235387000     -2.461713000
